# Supplementary material for: Sulphur ylide-mediated cyclopropanation and subsequent spirocyclopropane rearrangement reactions
Source: Royal Society of Chemistry journal article supplement (doi:10.1039/d2ob00466f), 2022-01-01

# Sulphur Ylide-Mediated Cyclopropanation and Subsequent Spirocyclopropane Rearrangement Reactions

Qing-Song Dai,<sup>a,d,e</sup> Jun-Long Li,<sup>c,d</sup> Qi-Wei Wang,<sup>a,c,d,\*</sup> Si-Lin Yang,<sup>d</sup> Ying-Mao Tao,<sup>d</sup> Mei-Hao He,<sup>d</sup> Qing-Zhu Li,<sup>c,d</sup> Bo Han<sup>b,c,\*</sup> and Xiang Zhang<sup>c,d,\*</sup>

<sup>a</sup> Chengdu Institute of Organic Chemistry, Chinese Academy of Sciences, Chengdu 610041, China. E-mail: wqw@cioc.ac.cn

<sup>b</sup> State Key Laboratory of Southwestern Chinese Medicine Resources, Hospital of Chengdu University of Traditional Chinese Medicine, School of Pharmacy, Chengdu University of Traditional Chinese Medicine, Chengdu 611137, China. E-mail: hanbo@cdutcm.edu.cn

<sup>c</sup> Institute for Advanced Study, Chengdu University, Chengdu 610106, China. E-mail: XZhang\_CDU@hotmail.com

<sup>d</sup> Antibiotics Research and Re-evaluation Key Laboratory of Sichuan Province, Sichuan Industrial Institute of Antibiotics, School of Pharmacy, Chengdu University, Chengdu 610106, PR China.

<sup>e</sup> University of Chinese Academy of Sciences, Beijing 100049, China.

## Supporting Information

### Table of Contents

|                                                                    |     |
|--------------------------------------------------------------------|-----|
| 1. General Information.....                                        | S2  |
| 2. Further Optimization Studies.....                               | S3  |
| 3. General Procedure for the Preparation of Products 3 or 5.....   | S5  |
| 4. Procedure for sulphide-catalyzed (2+1) annulation.....          | S34 |
| 5. Investigation for the Rearrangement of 3.....                   | S35 |
| 5.1 General procedure for the ring-opening rearrangement of 3..... | S35 |
| 5.2 General procedure for the oxidation/rearrangement of 9.....    | S38 |
| 5.3 Proposed reaction mechanism.....                               | S41 |
| 6. Crystal Data and Structure Refinement.....                      | S42 |
| 7. References and Notes.....                                       | S45 |
| 8. NMR Spectra.....                                                | S46 |

## 1. General Information

### General Procedures

- All reactions were performed in oven-dried or flame-dried reaction vessels, modified Schlenk flasks, or round-bottom flasks. The flasks were fitted with Teflon screw caps and reactions were conducted under an atmosphere of argon if needed. Gas-tight syringes with stainless steel needles were used to transfer air- and moisture-sensitive liquids. All moisture and/or air sensitive solid compounds were manipulated inside normal desiccators. Flash column chromatography was performed using silica gel (40–63  $\mu\text{m}$ , 230–400 mesh).
- Analytical thin layer chromatography (TLC) was performed on silica gel 60 F<sub>254</sub> aluminum plates (Merck) containing a 254 nm fluorescent indicator. TLC plates were visualized by exposure to short wave ultraviolet light (254 nm) and I<sub>2</sub>.
- Organic solutions were concentrated at 30–50 °C on rotary evaporators at ~10 torr followed by drying on vacuum pump at ~1 torr. Reaction temperatures are reported as the temperature of the bath surrounding the vessel unless otherwise stated.

### Materials

- Commercial reagents and solvents were purchased from Adamas-beta, Aldrich Chemical Co., Alfa Aesar, Macklin, Leyan, and Energy Chemical used as received with the following exceptions: THF, Et<sub>2</sub>O and toluene were purified by refluxing over Na-benzophenone under positive argon pressure followed by distillation.<sup>1</sup> The aza-dienes **1**<sup>2</sup> and sulphonium bromides **2**<sup>3</sup> were prepared according to literature procedure.

### Instrumentation

- Proton nuclear magnetic resonance (<sup>1</sup>H NMR) spectra were recorded with JEOL-600M. Proton chemical shifts are reported in parts per million ( $\delta$  scale), and are referenced using residual protium in the NMR solvent (CDCl<sub>3</sub>:  $\delta$  7.26 (CHCl<sub>3</sub>)). Data are reported as follows: chemical shift [multiplicity (s = singlet, d = doublet, t = triplet, q = quartet, m = multiplet, br s = broad singlet), coupling constant(s) (Hz), integration].
- Carbon-13 nuclear magnetic resonance (<sup>13</sup>C NMR) spectra were recorded with JEOL 150 MHz spectrometers. Carbon chemical shifts are reported in parts per million ( $\delta$  scale), and are referenced using the carbon resonances of the solvent ( $\delta$  77.0 (CHCl<sub>3</sub>)). Data are reported as follows: chemical shift [multiplicity (if not singlet), assignment (C<sub>q</sub> = fully substituted carbon)].
- High resolution mass spectra (HRMS) were recorded on a Waters SYNAPT G2 using an electrospray (ESI) ionisation source.
- Melting points were recorded on WRX-X-4A melting point apparatus.

## 2. Further Optimization Studies

**Table S1.** Optimisation of (2+1) Cascade <sup>a</sup>

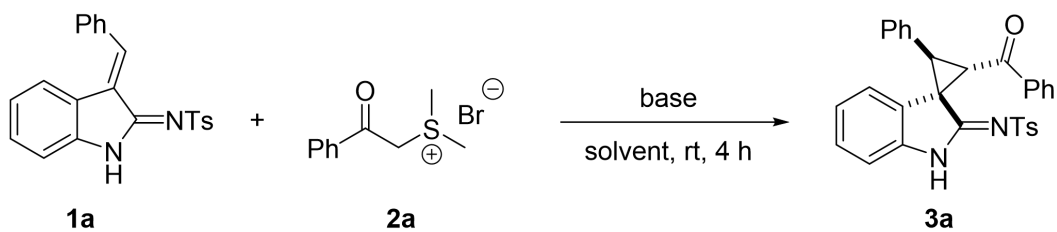

| Entry           | Base                            | Solvent           | Yield (%) <sup>b</sup> | dr <sup>c</sup> |
|-----------------|---------------------------------|-------------------|------------------------|-----------------|
| 1               | Cs <sub>2</sub> CO <sub>3</sub> | DCM               | 81                     | 5:1             |
| 2               | Cs <sub>2</sub> CO <sub>3</sub> | toluene           | 50                     | 6:1             |
| 3               | Cs <sub>2</sub> CO <sub>3</sub> | MeCN              | 83                     | 6:1             |
| 4               | Cs <sub>2</sub> CO <sub>3</sub> | CHCl <sub>3</sub> | 33                     | 7:1             |
| 5               | Cs <sub>2</sub> CO <sub>3</sub> | THF               | <5                     | -               |
| 6               | Cs <sub>2</sub> CO <sub>3</sub> | EtOH              | 75                     | 6:1             |
| 7               | Cs <sub>2</sub> CO <sub>3</sub> | EA                | 74                     | 6:1             |
| 8               | K <sub>3</sub> PO <sub>4</sub>  | MeCN              | 62                     | 5:1             |
| 9               | K <sub>2</sub> CO <sub>3</sub>  | MeCN              | 87                     | 6:1             |
| 10              | NaOAc                           | MeCN              | 34                     | 5:1             |
| 11              | NaHCO <sub>3</sub>              | MeCN              | 46                     | 2:1             |
| 12              | Et <sub>3</sub> N               | MeCN              | 11                     | 6:1             |
| 13              | DBU                             | MeCN              | 48                     | 10:1            |
| 14              | TMG                             | MeCN              | <5                     | -               |
| 15              | DBACO                           | MeCN              | 82                     | 5:1             |
| 16 <sup>d</sup> | K <sub>2</sub> CO <sub>3</sub>  | MeCN              | 85                     | 6:1             |

<sup>a</sup> Unless otherwise noted, reactions were performed with 0.10 mmol of **1a**, 0.12 mmol of **2a** and 0.12 mmol of base in 1.0 mL of solvent at room temperature for 4 hours. <sup>b</sup> Isolated yield. <sup>c</sup> Determined by <sup>1</sup>H NMR analysis of the crude reaction. <sup>d</sup> The reaction was performed at 0 °C.

**Table S2.** Optimisation of (1+1+1) Cascade <sup>a</sup>

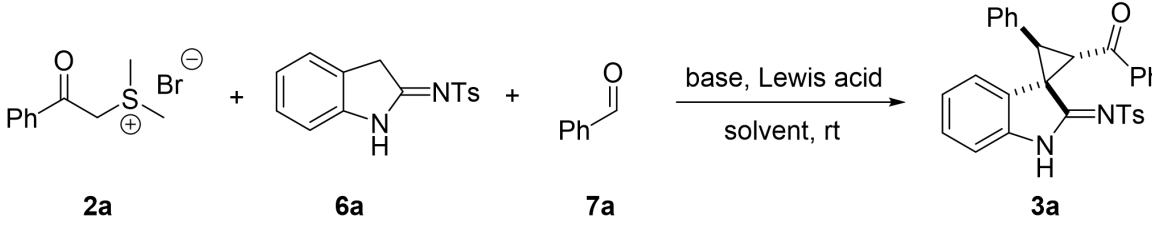

| Entry           | Lewis acid                        | Base                            | Solvent | Yield (%) <sup>b</sup> | dr <sup>c</sup> |
|-----------------|-----------------------------------|---------------------------------|---------|------------------------|-----------------|
| 1               | BF <sub>3</sub> ·OEt <sub>2</sub> | K <sub>2</sub> CO <sub>3</sub>  | MeCN    | 61                     | 5:1             |
| 2               | Mg(OTf) <sub>2</sub>              | K <sub>2</sub> CO <sub>3</sub>  | MeCN    | <5                     | -               |
| 3               | Sc(OTf) <sub>3</sub>              | K <sub>2</sub> CO <sub>3</sub>  | MeCN    | <5                     | -               |
| 4               | Al(OiPr) <sub>3</sub>             | K <sub>2</sub> CO <sub>3</sub>  | MeCN    | 59                     | 4:1             |
| 5               | BF <sub>3</sub> ·OEt <sub>2</sub> | K <sub>2</sub> CO <sub>3</sub>  | DCM     | 58                     | 3:1             |
| 6               | BF <sub>3</sub> ·OEt <sub>2</sub> | K <sub>2</sub> CO <sub>3</sub>  | THF     | <5                     | -               |
| 7               | BF <sub>3</sub> ·OEt <sub>2</sub> | K <sub>2</sub> CO <sub>3</sub>  | toluene | 61                     | 7:1             |
| 8               | BF <sub>3</sub> ·OEt <sub>2</sub> | K <sub>3</sub> PO <sub>4</sub>  | toluene | 71                     | 4:1             |
| 9               | BF <sub>3</sub> ·OEt <sub>2</sub> | Cs <sub>2</sub> CO <sub>3</sub> | toluene | 73                     | 7:1             |
| 10              | BF <sub>3</sub> ·OEt <sub>2</sub> | Et <sub>3</sub> N               | toluene | <5                     | -               |
| 11              | BF <sub>3</sub> ·OEt <sub>2</sub> | DBU                             | toluene | <5                     | -               |
| 12              | BF <sub>3</sub> ·OEt <sub>2</sub> | TMG                             | toluene | <5                     | -               |
| 13              | BF <sub>3</sub> ·OEt <sub>2</sub> | DBACO                           | toluene | <5                     | -               |
| 14 <sup>d</sup> | BF <sub>3</sub> ·OEt <sub>2</sub> | Cs <sub>2</sub> CO <sub>3</sub> | toluene | 23                     | 5:1             |
| 15 <sup>e</sup> | BF <sub>3</sub> ·OEt <sub>2</sub> | Cs <sub>2</sub> CO <sub>3</sub> | toluene | 36                     | 4:1             |

<sup>a</sup> Unless otherwise noted, reactions were performed with 0.12 mmol of **2a**, 0.1 mmol of **6a**, 0.15 mmol of **7a**, 0.12 mmol of base and 0.1 mmol Lewis acid in 1.0 mL of solvent at room temperature for 12 hours. <sup>b</sup> Isolated yield. <sup>c</sup> Determined by <sup>1</sup>H NMR analysis of the crude reaction. <sup>d</sup> 0.5 mL solvent was used. <sup>e</sup> 2 mL solvent was used.

### 3. General Procedure for the Preparation of Products 3 or 5

**Procedure A:** the direct annulation of **1** and **2** or **4**

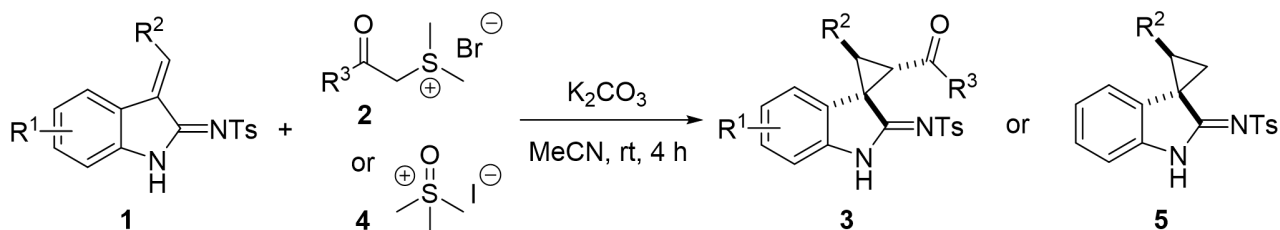

A glass tube was charged with aza-dienes **1** (0.10 mmol), sulphonium bromides **2** (0.12 mmol) or Corey-Chaykovsky reagent **4** (0.12 mmol),  $K_2CO_3$  (0.12 mmol) in 1 mL MeCN. The mixture was stirred at room temperature for 4 hours. Then the mixture was concentrated and purified by column chromatography on silica gel eluting with petroleum ether/ethyl acetate from 15:1 to 5:1 to afford the corresponding product **3** or **5**.

**Procedure B:** the three-component reaction of **2**, **6** and **7**

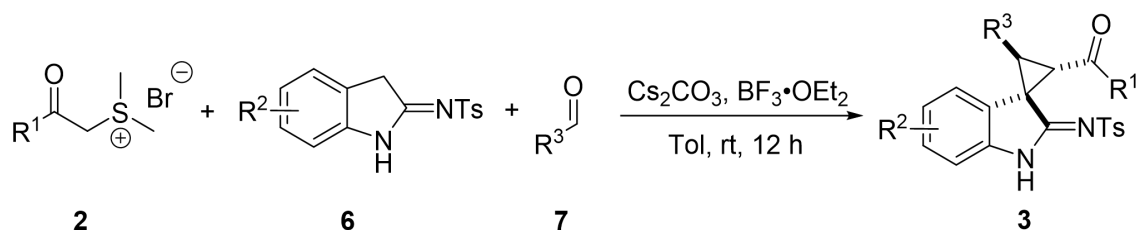

A glass tube was charged with sulphonium bromides **2** (0.12 mmol), iminoindoline **6** (0.10 mmol), aldehyde **7** (0.12 mmol),  $Cs_2CO_3$  (0.12 mmol) and  $BF_3 \cdot OEt_2$  (0.1 mmol) in 1 mL toluene. The mixture was stirred at room temperature for 12 hours. Then the mixture was purified by column chromatography on silica gel eluting with petroleum ether/ethyl acetate from 15:1 to 5:1 to afford the corresponding product **3**.

**Procedure for large-scale synthesis of 3d**

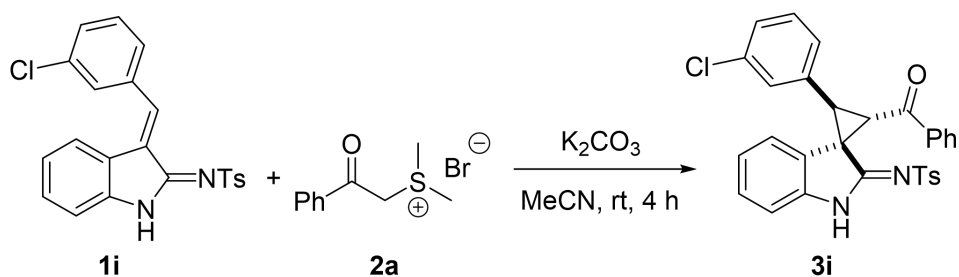

A glass tube was charged with aza-diene **1i** (20 mmol, 1.052 g), sulphonium bromide **2a** (24

mmol, 626.4 mg), K<sub>2</sub>CO<sub>3</sub> (24 mmol, 331.2 mg) in 20 mL MeCN. The mixture was stirred at room temperature for 4 hours. Then the mixture was concentrated and purified by column chromatography on silica gel eluting with petroleum ether/ethyl acetate from 15:1 to 5:1 to afford the corresponding product **3i** (948.6 mg) in 90% yield as light yellow solid. The diastereomeric ratio was determined to be 9:1 by crude <sup>1</sup>H-NMR analysis.

**N-((Z)-2-benzoyl-3-phenylspiro[cyclopropane-1,3'-indolin]-2'-ylidene)-4-methylbenzenesulfonamide 3a**

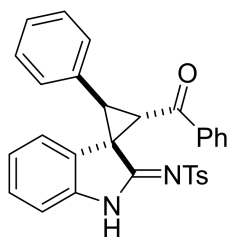

Prepared according to the *General Procedure A* to afford **3a** (42.8 mg) in 87% yield as light yellow solid, m.p. = 181 – 184 °C. The diastereomeric ratio was determined to be 6:1 by crude <sup>1</sup>H-NMR analysis.

Prepared according to the *General Procedure B* to afford chiral **3a** (35.9 mg) in 73% yield as light yellow solid. The diastereomeric ratio was determined to be 7:1 by crude <sup>1</sup>H-NMR analysis.

*NMR and HRMS data for the product 3a:*

<sup>1</sup>H NMR (600 MHz, CDCl<sub>3</sub>) δ (ppm): 10.15 (s, 1H), 7.93 (d, *J* = 7.8 Hz, 2H), 7.55 (t, *J* = 7.2 Hz, 1H), 7.43 – 7.39 (m, 2H), 7.32 – 7.27 (m, 3H), 7.21 (t, *J* = 7.2 Hz, 1H), 7.16 (d, *J* = 7.2 Hz, 2H), 7.11 – 7.06 (m, 5H), 7.05 – 7.01 (m, 2H), 4.47 (d, *J* = 9.0 Hz, 1H), 4.25 (d, *J* = 9.0 Hz, 1H), 2.39 (s, 3H).

<sup>13</sup>C NMR (150 MHz, CDCl<sub>3</sub>) δ (ppm): 192.2, 165.6, 142.5, 140.9, 138.7, 136.5, 133.9, 131.9, 129.5, 129.1, 128.9, 128.5, 127.9, 127.5, 126.5, 126.0, 123.6, 122.0, 110.0, 43.8, 43.0, 42.3, 21.5.

HRMS (ESI) *m/z* calculated for C<sub>30</sub>H<sub>24</sub>N<sub>2</sub>O<sub>3</sub>S+Na<sup>+</sup>: 515.1400, found: 515.1407.

**N-((Z)-2-benzoyl-3-(4-fluorophenyl)spiro[cyclopropane-1,3'-indolin]-2'-ylidene)-4-methylbenzenesulfonamide 3b**

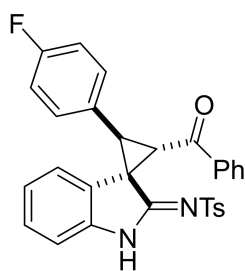

Prepared according to the **General Procedure A** to afford **3b** (46.4 mg) in 91% yield as white solid, m.p. = 218 – 220 °C. The diastereomeric ratio was determined to be 10:1 by crude <sup>1</sup>H-NMR analysis.

*NMR and HRMS data for the product 3b:*

<sup>1</sup>H NMR (600 MHz, CDCl<sub>3</sub>) δ (ppm): 10.24 (s, 1H), 7.96 (d, *J* = 6.6 Hz, 2H), 7.58 (t, *J* = 7.2 Hz, 1H), 7.48 – 7.43 (m, 2H), 7.38 (d, *J* = 7.8 Hz, 2H), 7.27 (d, *J* = 3.0 Hz, 1H), 7.24 (t, *J* = 8.4 Hz, 1H), 7.16 (d, *J* = 8.4 Hz, 2H), 7.08 – 7.00 (m, 4H), 6.65 – 6.60 (m, 2H), 4.42 (d, *J* = 9.0 Hz, 1H), 4.18 (d, *J* = 9.0 Hz, 1H), 2.44 (s, 3H).

<sup>13</sup>C NMR (150 MHz, CDCl<sub>3</sub>) δ (ppm): 192.1, 165.0, 162.0 (d, *J* = 244.2 Hz, 1C), 143.0, 140.9, 138.5, 136.4, 134.0, 131.0 (d, *J* = 8.6 Hz, 1C), 129.1, 128.9, 128.5, 128.0, 127.6, 126.3, 123.7, 122.0, 114.7 (d, *J* = 21.6 Hz, 1C), 110.0, 43.5, 42.9, 41.4, 21.4.

HRMS (ESI) *m/z* calculated for C<sub>30</sub>H<sub>23</sub>FN<sub>2</sub>O<sub>3</sub>S+Na<sup>+</sup>: 533.1306, found: 533.1312.

**N-((Z)-2-benzoyl-3-(4-chlorophenyl)spiro[cyclopropane-1,3'-indolin]-2'-ylidene)-4-methylbenzenesulfonamide 3c**

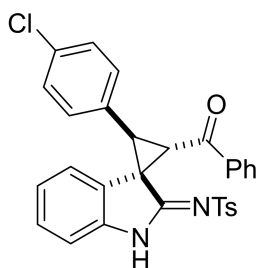

Prepared according to the **General Procedure A** to afford **3c** (44.3 mg) in 84% yield as white solid, m.p. = 223 – 225 °C. The diastereomeric ratio was determined to be 11:1 by crude <sup>1</sup>H-NMR analysis.

Prepared according to the **General Procedure B** to afford chiral **3c** (24.2 mg) in 46% yield as white solid. The diastereomeric ratio was determined to be 7:1 by crude <sup>1</sup>H-NMR analysis.

*NMR and HRMS data for the product 3c:*

**<sup>1</sup>H NMR (600 MHz, CDCl<sub>3</sub>)** δ (ppm): 10.21 (s, 1H), 7.96 – 7.92 (m, 2H), 7.58 – 7.54 (m, 1H), 7.46 – 7.42 (m, 2H), 7.35 (d, *J* = 8.4 Hz, 2H), 7.25 – 7.21 (m, 2H), 7.18 (d, *J* = 7.8 Hz, 2H), 7.06 – 7.00 (m, 4H), 6.90 (d, *J* = 7.8 Hz, 2H), 4.41 (d, *J* = 7.8 Hz, 1H), 4.16 (d, *J* = 9.0 Hz, 1H), 2.44 (s, 3H).

**<sup>13</sup>C NMR (150 MHz, CDCl<sub>3</sub>)** δ (ppm): 192.0, 165.0, 143.1, 140.9, 138.4, 136.4, 134.0, 133.4, 130.7, 130.5, 129.2, 128.9, 128.5, 128.1, 127.9, 126.1, 125.9, 123.7, 122.0, 111.0, 43.5, 42.8, 41.2, 21.6.

**HRMS (ESI)** *m/z* calculated for C<sub>30</sub>H<sub>23</sub>ClN<sub>2</sub>O<sub>3</sub>S+Na<sup>+</sup>: 549.1010(<sup>35</sup>Cl), 550.1044 (<sup>37</sup>Cl), found: 549.1002, 550.1050.

**N-((Z)-2-benzoyl-3-(4-bromophenyl)spiro[cyclopropane-1,3'-indolin]-2'-ylidene)-4-methylbenzenesulfonamide 3d**

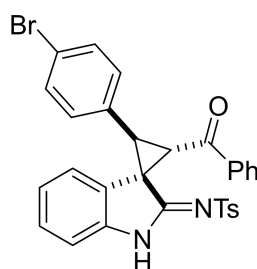

Prepared according to the **General Procedure A** to afford **3d** (40.0 mg) in 70% yield as white solid, m.p. = 234 – 239 °C. The diastereomeric ratio was determined to be 7:1 by crude <sup>1</sup>H-NMR analysis.

Prepared according to the **General Procedure B** to afford chiral **3d** (33.7 mg) in 59% yield as white solid. The diastereomeric ratio was determined to be 6:1 by crude <sup>1</sup>H-NMR analysis.

*NMR and HRMS data for the product 3d:*

**<sup>1</sup>H NMR (600 MHz, CDCl<sub>3</sub>)** δ (ppm): 10.25 (s, 1H), 7.95 – 7.92 (m, 2H), 7.58 – 7.53 (m, 1H), 7.46 – 7.41 (m, 2H), 7.36 (d, *J* = 8.4 Hz, 2H), 7.25 – 7.18 (m, 4H), 7.09 – 7.01 (m, 4H), 6.96 (d, *J* = 8.4 Hz, 2H), 4.40 (d, *J* = 9.0 Hz, 1H), 4.14 (d, *J* = 9.0 Hz, 1H), 2.45 (s, 3H).

**<sup>13</sup>C NMR (150 MHz, CDCl<sub>3</sub>)** δ (ppm): 191.9, 165.0, 143.1, 141.0, 138.4, 136.4, 134.0, 131.1, 131.0, 130.8, 129.3, 128.9, 128.5, 128.1, 126.1, 125.9, 123.7, 122.0, 121.6, 111.0, 43.5, 42.8, 41.2, 21.7.

**HRMS (ESI)** *m/z* calculated for C<sub>30</sub>H<sub>23</sub>BrN<sub>2</sub>O<sub>3</sub>S+Na<sup>+</sup>: 593.0505(<sup>79</sup>Br), 595.0485 (<sup>81</sup>Br), found: 593.0501, 595.0474.



**N-((Z)-2-benzoyl-3-(4-nitrophenyl)spiro[cyclopropane-1,3'-indolin]-2'-ylidene)-4-methylbenzenesulfonamide 3e**

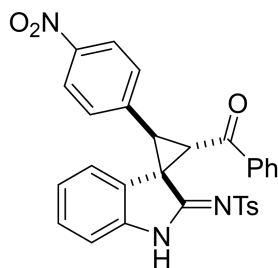

Prepared according to the **General Procedure A** to afford **3e** (41.3 mg) in 77% yield as white solid, m.p. = 232 – 234 °C. The diastereomeric ratio was determined to be 20:1 by crude <sup>1</sup>H-NMR analysis.

*NMR and HRMS data for the product 3e:*

<sup>1</sup>H NMR (600 MHz, CDCl<sub>3</sub>) δ (ppm): 10.26 (s, 1H), 7.95 (d, *J* = 6.6 Hz, 2H), 7.73 – 7.69 (m, 2H), 7.59 (t, *J* = 7.2 Hz, 1H), 7.48 – 7.40 (m, 2H), 7.36 (d, *J* = 8.4 Hz, 2H), 7.25 – 7.20 (m, 4H), 7.08 – 7.02 (m, 4H), 4.44 (d, *J* = 8.4 Hz, 1H), 4.23 (d, *J* = 8.4 Hz, 1H), 2.37 (s, 3H).

<sup>13</sup>C NMR (150 MHz, CDCl<sub>3</sub>) δ (ppm): 191.5, 164.4, 146.7, 143.7, 141.1, 139.8, 138.4, 136.2, 134.2, 130.3, 129.0, 129.0, 128.6, 128.5, 125.9, 125.5, 123.9, 122.7, 122.1, 111.2, 43.2, 42.5, 40.5, 21.3.

HRMS (ESI) *m/z* calculated for C<sub>30</sub>H<sub>23</sub>N<sub>3</sub>O<sub>5</sub>S+Na<sup>+</sup>: 560.1251, found: 560.1248.

**N-((Z)-2-benzoyl-3-(p-tolyl)spiro[cyclopropane-1,3'-indolin]-2'-ylidene)-4-methylbenzenesulfonamide 3f**

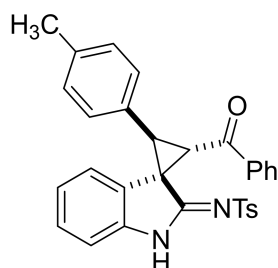

Prepared according to the **General Procedure A** to afford **3f** (44.5 mg) in 88% yield as light yellow solid, m.p. = 225 – 226 °C. The diastereomeric ratio was determined to be 5:1 by crude <sup>1</sup>H-NMR analysis.

Prepared according to the **General Procedure B** to afford chiral **3f** (27.8 mg) in 55% yield as light yellow solid. The diastereomeric ratio was determined to be 3:1 by crude <sup>1</sup>H-NMR analysis.

*NMR and HRMS data for the product 3f:*

<sup>1</sup>H NMR (600 MHz, CDCl<sub>3</sub>) δ (ppm): 10.15 (s, 1H), 7.94 (d, *J* = 8.4 Hz, 2H), 7.55 (t, *J* = 7.2 Hz, 1H), 7.45 – 7.40 (m, 2H), 7.31 (d, *J* = 9.0 Hz, 2H), 7.28 (d, *J* = 7.2 Hz, 1H), 7.21 (t, *J* = 7.8 Hz, 1H), 7.09 (d, *J* = 7.2 Hz, 2H), 7.04 – 7.01 (m, 4H), 6.84 (d, *J* = 7.2 Hz, 2H), 4.45 (d, *J* = 8.4 Hz, 1H), 4.21 (d, *J* = 9.0 Hz, 1H), 2.41 (s, 3H), 2.24 (s, 3H).

<sup>13</sup>C NMR (150 MHz, CDCl<sub>3</sub>) δ (ppm): 192.3, 165.6, 142.4, 140.8, 138.7, 136.9, 136.5, 133.9, 129.4, 128.9, 128.9, 128.8, 128.5, 128.5, 127.8, 126.6, 126.1, 123.6, 122.0, 110.9, 43.9, 43.1, 42.3, 21.5, 21.2.

HRMS (ESI) *m/z* calculated for C<sub>31</sub>H<sub>26</sub>N<sub>2</sub>O<sub>3</sub>S+H<sup>+</sup>: 507.1737, found: 507.1744.

**N-((Z)-2-benzoyl-3-(4-methoxyphenyl)spiro[cyclopropane-1,3'-indolin]-2'-ylidene)-4-methylbenzenesulfonamide 3g**

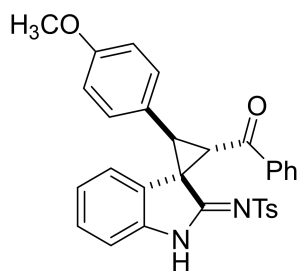

Prepared according to the **General Procedure A** to afford **3g** (48.0 mg) in 92% yield as yellow solid, m.p. = 200 – 202 °C. The diastereomeric ratio was determined to be 5:1 by crude <sup>1</sup>H-NMR analysis.

*NMR and HRMS data for the product 3g:*

<sup>1</sup>H NMR (600 MHz, CDCl<sub>3</sub>) δ (ppm): 10.19 (s, 1H), 7.94 (d, *J* = 7.8 Hz, 2H), 7.55 (t, *J* = 6.6 Hz, 1H), 7.46 – 7.41 (m, 2H), 7.32 (d, *J* = 7.8 Hz, 2H), 7.27 (d, *J* = 7.2 Hz, 1H), 7.22 – 7.18 (m, 1H), 7.09 (d, *J* = 7.8 Hz, 2H), 7.07 – 7.00 (m, 4H), 6.55 (d, *J* = 8.4 Hz, 2H), 4.45 (d, *J* = 9.0 Hz, 1H), 4.19 (d, *J* = 9.0 Hz, 1H), 3.73 (s, 3H), 2.39 (s, 3H).

<sup>13</sup>C NMR (150 MHz, CDCl<sub>3</sub>) δ (ppm): 192.3, 165.5, 158.9, 142.5, 140.8, 138.6, 136.5, 133.9, 130.6, 129.0, 128.9, 128.5, 128.1, 127.8, 126.6, 125.9, 123.7, 123.6, 122.0, 113.2, 110.8, 54.9, 43.9, 43.1, 42.2, 21.5.

HRMS (ESI)  $m/z$  calculated for  $C_{31}H_{26}N_2O_4S+H^+$ : 523.1686, found: 523.1692.

**N-((Z)-2-benzoyl-3-(3-fluorophenyl)spiro[cyclopropane-1,3'-indolin]-2'-ylidene)-4-methylbenzenesulfonamide 3h**

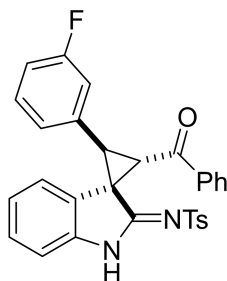

Prepared according to the *General Procedure A* to afford **3h** (38.8 mg) in 76% yield as white solid, m.p. = 204 – 208 °C. The diastereomeric ratio was determined to be 5:1 by crude  $^1H$ -NMR analysis.

*NMR and HRMS data for the product 3h:*

$^1H$  NMR (600 MHz,  $CDCl_3$ )  $\delta$  (ppm): 10.12 (s, 1H), 7.93 (d,  $J = 8.4$  Hz, 2H), 7.57 (t,  $J = 7.2$  Hz, 1H), 7.47 – 7.41 (m, 2H), 7.38 (d,  $J = 7.8$  Hz, 2H), 7.25 – 7.21 (m, 2H), 7.13 (d,  $J = 7.8$  Hz, 2H), 7.06 – 6.96 (m, 3H), 6.93 (d,  $J = 7.2$  Hz, 1H), 6.82 – 6.78 (m, 1H), 6.71 – 6.66 (m, 1H), 4.42 (d,  $J = 9.0$  Hz, 1H), 4.19 (d,  $J = 9.0$  Hz, 1H), 2.41 (s, 3H).

$^{13}C$  NMR (150 MHz,  $CDCl_3$ )  $\delta$  (ppm): 191.9, 165.2, 162.2 (d,  $J = 244.2$  Hz, 1C), 142.8, 140.9, 138.7, 136.4, 134.5, 134.0, 129.6, 129.3 (d,  $J = 7.2$  Hz, 1C),, 128.9, 128.5, 128.1, 126.1, 126.0, 125.2, 123.7, 122.1, 116.5 (d,  $J = 23.1$  Hz, 1C), 114.5(d,  $J = 21.6$  Hz, 1C), 110.9, 43.5, 42.8, 41.4, 21.5.

HRMS (ESI)  $m/z$  calculated for  $C_{30}H_{23}FN_2O_3S+Na^+$ : 533.1306, found: 533.1306.

**N-((Z)-2-benzoyl-3-(3-chlorophenyl)spiro[cyclopropane-1,3'-indolin]-2'-ylidene)-4-methylbenzenesulfonamide 3i**

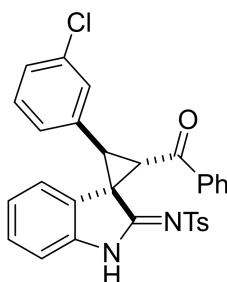

Prepared according to the *General Procedure A* to afford **3i** (49.5 mg) in 94% yield as light

yellow solid, m.p. = 207 – 211 °C. The diastereomeric ratio was determined to be 9:1 by crude <sup>1</sup>H-NMR analysis.

Prepared according to the **General Procedure B** to afford chiral **3i** (30.0 mg) in 57% yield as light yellow solid. The diastereomeric ratio was determined to be 7:1 by crude <sup>1</sup>H-NMR analysis.

*NMR and HRMS data for the product 3i:*

**<sup>1</sup>H NMR (600 MHz, CDCl<sub>3</sub>)** δ (ppm): 10.10 (s, 1H), 7.93 (d, *J* = 7.8 Hz, 2H), 7.57 (t, *J* = 7.8 Hz, 1H), 7.46 – 7.42 (m, 2H), 7.36 (d, *J* = 8.4 Hz, 2H), 7.25 – 7.21 (m, 2H), 7.14 (d, *J* = 7.8 Hz, 2H), 7.09 (s, 1H), 7.06 – 7.01 (m, 3H), 6.97 – 6.93 (m, 2H), 4.42 (d, *J* = 9.0 Hz, 1H), 4.18 (d, *J* = 9.0 Hz, 1H), 2.42 (s, 3H).

**<sup>13</sup>C NMR (150 MHz, CDCl<sub>3</sub>)** δ (ppm): 191.8, 165.1, 142.8, 140.9, 138.6, 136.4, 134.1, 134.1, 133.8, 129.5, 129.2, 129.0, 129.0, 128.5, 128.1, 127.7, 127.7, 126.0, 125.9, 123.8, 122.1, 110.9, 43.4, 42.6, 41.2, 21.5.

**HRMS (ESI)** m/z calculated for C<sub>30</sub>H<sub>23</sub>ClN<sub>2</sub>O<sub>3</sub>S+Na<sup>+</sup>: 549.1010(<sup>35</sup>Cl), 550.1044 (<sup>37</sup>Cl), found: 549.1013, 550.1040.

**N-((Z)-2-benzoyl-3-(m-tolyl)spiro[cyclopropane-1,3'-indolin]-2'-ylidene)-4-methylbenzene sulfonamide 3j**

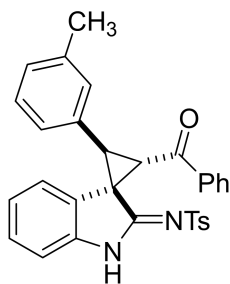

Prepared according to the **General Procedure A** to afford **3j** (47.0 mg) in 93% yield as white solid, m.p. = 191 – 193 °C. The diastereomeric ratio was determined to be 6:1 by crude <sup>1</sup>H-NMR analysis.

*NMR and HRMS data for the product 3j:*

**<sup>1</sup>H NMR (600 MHz, CDCl<sub>3</sub>)** δ (ppm): 10.06 (s, 1H), 7.94 (d, *J* = 7.8 Hz, 2H), 7.56 (t, *J* = 7.2 Hz, 1H), 7.46 – 7.42 (m, 2H), 7.29 – 7.25 (m, 3H), 7.23 – 7.19 (m, 1H), 7.08 (d, *J* = 8.4 Hz, 2H), 7.05 – 7.01 (m, 2H), 6.97 (d, *J* = 4.8 Hz, 2H), 6.95 (s, 1H), 6.91 – 6.87 (m, 1H), 4.47 (d, *J* = 9.0 Hz, 1H), 4.22 (d, *J* = 9.0 Hz, 1H), 2.40 (s, 3H), 2.14 (s, 3H).

$^{13}\text{C}$  NMR (150 MHz,  $\text{CDCl}_3$ )  $\delta$  (ppm): 192.2, 165.7, 142.4, 140.8, 138.8, 137.4, 136.6, 133.9, 131.8, 130.2, 129.0, 128.9, 128.5, 128.3, 127.9, 126.6, 126.6, 126.0, 123.7, 122.1, 110.8, 43.8, 43.0, 42.4, 21.5, 21.2.

HRMS (ESI)  $m/z$  calculated for  $\text{C}_{31}\text{H}_{26}\text{N}_2\text{O}_3\text{S}+\text{Na}^+$ : 529.1556, found: 529.1563.

**N-((Z)-2-benzoyl-3-(2-fluorophenyl)spiro[cyclopropane-1,3'-indolin]-2'-ylidene)-4-methylbenzenesulfonamide 3k**

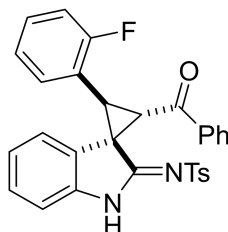

Prepared according to the *General Procedure A* to afford **3k** (41.3 mg) in 81% yield as white solid, m.p. = 214 – 218 °C. The diastereomeric ratio was determined to be 20:1 by crude  $^1\text{H}$ -NMR analysis.

*NMR and HRMS data for the product 3k:*

$^1\text{H}$  NMR (600 MHz,  $\text{CDCl}_3$ )  $\delta$  (ppm): 10.17 (s, 1H), 7.91 (d,  $J = 7.8$  Hz, 2H), 7.55 (t,  $J = 7.2$  Hz, 1H), 7.44 – 7.37 (m, 4H), 7.28 – 7.25 (m, 1H), 7.24 – 7.19 (m, 2H), 7.13 (d,  $J = 7.8$  Hz, 2H), 7.06 – 6.98 (m, 3H), 6.90 (t,  $J = 7.8$  Hz, 1H), 6.57 (t,  $J = 9.0$  Hz, 1H), 4.33 (d,  $J = 8.4$  Hz, 1H), 4.10 (d,  $J = 8.4$  Hz, 1H), 2.41 (s, 3H).

$^{13}\text{C}$  NMR (150 MHz,  $\text{CDCl}_3$ )  $\delta$  (ppm): 192.0, 165.5, 161.5 (d,  $J = 245.7$  Hz, 1C), 142.6, 141.0, 138.7, 136.5, 134.0, 131.1, 129.2, 129.1, 128.9, 128.5, 128.0, 126.2, 125.9, 123.7, 123.4 (d,  $J = 2.9$  Hz, 1C), 122.1, 119.9 (d,  $J = 14.4$  Hz, 1C), 114.7 (d,  $J = 20.1$  Hz, 1C), 110.9, 42.8, 42.8, 35.7, 21.5.

HRMS (ESI)  $m/z$  calculated for  $\text{C}_{30}\text{H}_{23}\text{FN}_2\text{O}_3\text{S}+\text{Na}^+$ : 533.1306, found: 533.1306.

**N-((Z)-2-benzoyl-3-(o-tolyl)spiro[cyclopropane-1,3'-indolin]-2'-ylidene)-4-methylbenzenesulfonamide 3l**

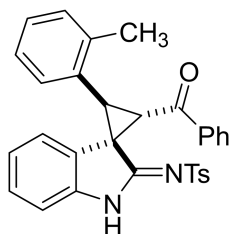

Prepared according to the **General Procedure A** to afford **3l** (43.5 mg) in 86% yield as yellow solid, m.p. = 178 – 182 °C. The diastereomeric ratio was determined to be 4:1 by crude <sup>1</sup>H-NMR analysis.

Prepared according to the **General Procedure B** to afford chiral **3l** (29.9 mg) in 59% yield as yellow solid. The diastereomeric ratio was determined to be 2:1 by crude <sup>1</sup>H-NMR analysis.

*NMR and HRMS data for the product 3l:*

<sup>1</sup>H NMR (600 MHz, CDCl<sub>3</sub>) δ (ppm): 10.07 (s, 1H), 7.94 (d, *J* = 6.6 Hz, 2H), 7.56 (t, *J* = 7.2 Hz, 1H), 7.46 – 7.41 (m, 2H), 7.30 (d, *J* = 7.8 Hz, 1H), 7.25 – 7.20 (m, 4H), 7.09 (d, *J* = 8.4 Hz, 2H), 7.07 – 7.01 (m, 4H), 6.82 – 6.79 (m, 1H), 4.45 (d, *J* = 8.4 Hz, 1H), 4.05 (d, *J* = 9.0 Hz, 1H), 2.41 (s, 3H), 1.73 (s, 3H).

<sup>13</sup>C NMR (150 MHz, CDCl<sub>3</sub>) δ (ppm): 192.3, 165.6, 142.5, 140.7, 138.6, 137.6, 136.5, 133.9, 131.1, 129.6, 129.5, 129.1, 128.9, 128.5, 127.9, 127.7, 126.3, 126.0, 125.5, 123.8, 122.0, 110.9, 43.6, 43.3, 41.4, 21.5, 19.2.

HRMS (ESI) *m/z* calculated for C<sub>31</sub>H<sub>26</sub>N<sub>2</sub>O<sub>3</sub>S+Na<sup>+</sup>: 529.1556, found: 529.1550.

**N-((Z)-2-benzoyl-3-(3,4-dimethylphenyl)spiro[cyclopropane-1,3'-indolin]-2'-ylidene)-4-methylbenzenesulfonamide 3m**

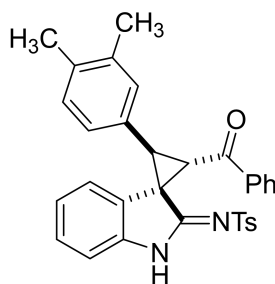

Prepared according to the **General Procedure A** to afford **3m** (37.4 mg) in 72% yield as light yellow solid, m.p. = 219 – 223 °C. The diastereomeric ratio was determined to be 5:1 by crude <sup>1</sup>H-NMR analysis.

*NMR and HRMS data for the product 3m:*

<sup>1</sup>H NMR (600 MHz, CDCl<sub>3</sub>) δ (ppm): 10.11 (s, 1H), 7.95 (d, *J* = 7.8 Hz, 2H), 7.55 (t, *J* = 7.2

Hz, 1H), 7.45 – 7.41 (m, 2H), 7.30 – 7.27 (m, 3H), 7.21 (t,  $J = 7.2$  Hz, 1H), 7.08 – 7.00 (m, 4H), 6.92 – 6.87 (m, 2H), 6.80 (d,  $J = 7.2$  Hz, 1H), 4.46 (d,  $J = 9.0$  Hz, 1H), 4.20 (d,  $J = 9.0$  Hz, 1H), 2.40 (s, 3H), 2.15 (s, 3H), 2.04 (s, 3H).

$^{13}\text{C}$  NMR (150 MHz,  $\text{CDCl}_3$ )  $\delta$  (ppm): 192.3, 165.7, 142.3, 140.8, 138.7, 136.6, 135.9, 135.5, 133.9, 130.7, 129.1, 128.9, 128.8, 128.5, 127.8, 126.9, 126.7, 126.0, 123.6, 122.1, 110.8, 43.9, 43.0, 42.5, 21.6, 19.5, 19.4.

HRMS (ESI)  $m/z$  calculated for  $\text{C}_{32}\text{H}_{28}\text{N}_2\text{O}_3\text{S}+\text{Na}^+$ : 543.1713, found: 543.1706.

**N-((Z)-2-benzoyl-3-(furan-2-yl)spiro[cyclopropane-1,3'-indolin]-2'-ylidene)-4-methylbenzenesulfonamide 3n**

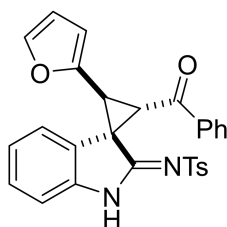

Prepared according to the *General Procedure A* to afford **3n** (36.6 mg) in 76% yield as yellow solid, m.p. = 182 – 185 °C. The diastereomeric ratio was determined to be 20:1 by crude  $^1\text{H}$ -NMR analysis.

Prepared according to the *General Procedure B* to afford chiral **3n** (35.2 mg) in 73% yield as yellow solid. The diastereomeric ratio was determined to be 7:1 by crude  $^1\text{H}$ -NMR analysis.

*NMR and HRMS data for the product 3n:*

$^1\text{H}$  NMR (600 MHz,  $\text{CDCl}_3$ )  $\delta$  (ppm): 10.15 (s, 1H), 7.89 (d,  $J = 7.8$  Hz, 2H), 7.61 (d,  $J = 8.4$  Hz, 2H), 7.57 – 7.52 (m, 1H), 7.43 – 7.38 (m, 2H), 7.24 – 7.18 (m, 4H), 7.05 – 7.00 (m, 3H), 6.20 (d,  $J = 3.6$  Hz, 1H), 6.06 (dd,  $J = 3.6, 1.8$  Hz, 1H), 4.38 (d,  $J = 9.0$  Hz, 1H), 4.03 (d,  $J = 9.0$  Hz, 1H), 2.42 (s, 3H).

$^{13}\text{C}$  NMR (150 MHz,  $\text{CDCl}_3$ )  $\delta$  (ppm): 191.4, 164.9, 146.1, 142.9, 141.9, 140.9, 138.7, 136.3, 134.0, 129.2, 128.9, 128.5, 128.1, 126.4, 125.6, 123.7, 122.0, 111.0, 110.3, 110.3, 42.9, 42.1, 34.4, 21.5.

HRMS (ESI)  $m/z$  calculated for  $\text{C}_{28}\text{H}_{22}\text{N}_2\text{O}_4\text{S}+\text{Na}^+$ : 505.1192, found: 505.1187.

**N-((Z)-2-benzoyl-3-(thiophen-2-yl)spiro[cyclopropane-1,3'-indolin]-2'-ylidene)-4-methylbenzenesulfonamide 3o**

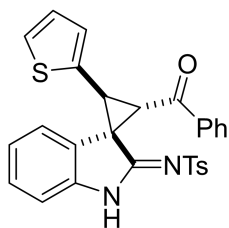

Prepared according to the **General Procedure A** to afford **3o** (40.8 mg) in 82% yield as gray solid, m.p. = 179 – 184 °C. The diastereomeric ratio was determined to be 12:1 by crude <sup>1</sup>H-NMR analysis.

*NMR and HRMS data for the product 3o:*

<sup>1</sup>H NMR (600 MHz, CDCl<sub>3</sub>) δ (ppm): 10.12 (br s, 1H), 7.90 (d, *J* = 7.8 Hz, 2H), 7.55 (t, *J* = 7.8 Hz, 1H), 7.48 (d, *J* = 8.4 Hz, 2H), 7.44 – 7.40 (m, 2H), 7.24 – 7.20 (m, 2H), 7.17 (d, *J* = 8.4 Hz, 2H), 7.03 (d, *J* = 8.4 Hz, 2H), 6.98 (d, *J* = 6.6 Hz, 1H), 6.90 (d, *J* = 4.2 Hz, 1H), 6.71 (dd, *J* = 6.4, 4.8 Hz, 1H), 4.43 (d, *J* = 8.4 Hz, 1H), 4.22 (d, *J* = 8.4 Hz, 1H), 2.41 (s, 3H).

<sup>13</sup>C NMR (150 MHz, CDCl<sub>3</sub>) δ (ppm): 191.6, 164.8, 142.7, 140.9, 138.8, 136.3, 134.5, 134.0, 129.1, 128.9, 128.5, 128.2, 128.1, 126.5, 126.3, 125.9, 125.4, 123.7, 122.0, 111.0, 44.1, 43.9, 37.0, 21.5.

HRMS (ESI) *m/z* calculated for C<sub>28</sub>H<sub>22</sub>N<sub>2</sub>O<sub>3</sub>S<sub>2</sub>+Na<sup>+</sup>: 521.0964, found: 521.0966.

**N-((Z)-2-benzoyl-3-(naphthalen-2-yl)spiro[cyclopropane-1,3'-indolin]-2'-ylidene)-4-methylbenzenesulfonamide 3p**

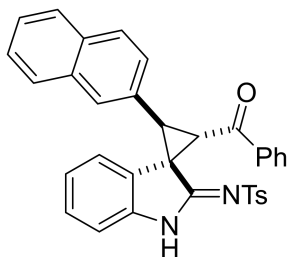

Prepared according to the **General Procedure A** to afford **3p** (30.9 mg) in 57% yield as light yellow solid, m.p. = 239 – 243 °C. The diastereomeric ratio was determined to be 2:1 by crude <sup>1</sup>H-NMR analysis.

Prepared according to the **General Procedure B** to afford chiral **3p** (26.0 mg) in 48% yield as light yellow solid. The diastereomeric ratio was determined to be 2:1 by crude <sup>1</sup>H-NMR analysis.

*NMR and HRMS data for the product 3p:*



**<sup>1</sup>H NMR (600 MHz, CDCl<sub>3</sub>)** δ (ppm): 10.11 (s, 1H), 8.01 (d, *J* = 7.8 Hz, 2H), 7.69 (d, *J* = 7.8 Hz, 1H), 7.65 – 7.55 (m, 3H), 7.50 – 7.40 (m, 5H), 7.33 (d, *J* = 7.8 Hz, 1H), 7.25 – 7.19 (m, 2H), 7.09 – 7.02 (m, 2H), 6.95 (d, *J* = 8.4 Hz, 2H), 6.47 (d, *J* = 7.8 Hz, 2H), 4.63 (d, *J* = 9.0 Hz, 1H), 4.39 (d, *J* = 9.0 Hz, 1H), 2.16 (s, 3H).

**<sup>13</sup>C NMR (150 MHz, CDCl<sub>3</sub>)** δ (ppm): 192.3, 165.4, 142.2, 140.9, 138.0, 136.5, 134.0, 132.9, 132.8, 129.5, 129.0, 128.6, 128.5, 128.5, 128.0, 127.8, 127.6, 127.4, 127.3, 126.5, 126.0, 125.8, 125.3, 123.7, 122.1, 110.9, 43.9, 42.9, 42.4, 21.4.

**HRMS (ESI)** *m/z* calculated for C<sub>34</sub>H<sub>26</sub>N<sub>2</sub>O<sub>3</sub>S+Na<sup>+</sup>: 565.1556, found: 565.1554.

**N-((Z)-2-benzoyl-3-phenethylspiro[cyclopropane-1,3'-indolin]-2'-ylidene)-4-methylbenzenesulfonamide 3q**

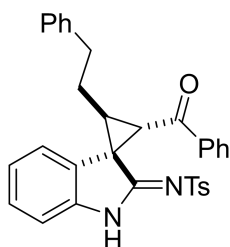

Prepared according to the *General Procedure A* to afford **3q** (28.6 mg) in 55% yield as white solid, m.p. = 177 – 180 °C. The diastereomeric ratio was determined to be 20:1 by crude <sup>1</sup>H-NMR analysis.

*NMR and HRMS data for the product 3q:*

**<sup>1</sup>H NMR (600 MHz, CDCl<sub>3</sub>)** δ (ppm): 10.06 (s, 1H), 7.89 (d, *J* = 8.4 Hz, 2H), 7.66 (d, *J* = 8.4 Hz, 2H), 7.48 (t, *J* = 7.8 Hz, 1H), 7.31 – 7.26 (m, 4H), 7.17 (t, *J* = 7.2 Hz, 1H), 7.10 (d, *J* = 7.8 Hz, 1H), 7.07 – 7.02 (m, 3H), 6.98 (t, *J* = 7.2 Hz, 1H), 6.94 (d, *J* = 7.2 Hz, 1H), 6.85 – 6.82 (m, 2H), 3.72 (d, *J* = 9.0 Hz, 1H), 2.90 – 2.84 (m, 1H), 2.61 – 2.54 (m, 1H), 2.53 – 2.47 (m, 1H), 2.43 (s, 3H), 2.41 – 2.34 (m, 1H), 2.30 – 2.22 (m, 1H).

**<sup>13</sup>C NMR (150 MHz, CDCl<sub>3</sub>)** δ (ppm): 192.4, 166.8, 143.2, 140.4, 140.3, 139.4, 136.6, 133.6, 129.5, 128.6, 128.5, 128.2, 128.2, 127.5, 126.9, 126.3, 125.7, 123.5, 122.0, 110.7, 45.4, 42.5, 38.9, 35.2, 25.6, 21.6.

**HRMS (ESI)** *m/z* calculated for C<sub>32</sub>H<sub>28</sub>N<sub>2</sub>O<sub>3</sub>S+Na<sup>+</sup>: 543.1713, found: 543.1703.

**N-((Z)-2-benzoyl-6'-chloro-3-phenylspiro[cyclopropane-1,3'-indolin]-2'-ylidene)-4-methylbenzenesulfonamide 3r**

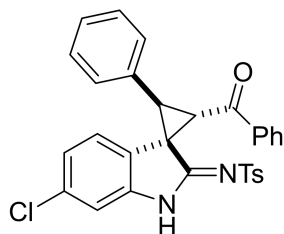

Prepared according to the **General Procedure A** to afford **3r** (33.7 mg) in 64% yield as white solid, m.p. = 234 – 236 °C. The diastereomeric ratio was determined to be 5:1 by crude <sup>1</sup>H-NMR analysis.

*NMR and HRMS data for the product 3r:*

**<sup>1</sup>H NMR (600 MHz, CDCl<sub>3</sub>)** δ (ppm): 10.09 (s, 1H), 7.93 (d, *J* = 6.6 Hz, 2H), 7.58 (t, *J* = 7.2 Hz, 1H), 7.47 – 7.42 (m, 2H), 7.28 (d, *J* = 8.4 Hz, 2H), 7.22 (d, *J* = 9.0 Hz, 1H), 7.15 – 7.12 (m, 2H), 7.12 – 7.04 (m, 5H), 7.03 – 6.99 (m, 2H), 4.45 (d, *J* = 9.0 Hz, 1H), 4.22 (d, *J* = 8.4 Hz, 1H), 2.40 (s, 3H).

**<sup>13</sup>C NMR (150 MHz, CDCl<sub>3</sub>)** δ (ppm): 192.1, 165.5, 142.7, 141.9, 138.4, 136.4, 134.1, 131.6, 129.5, 129.2, 129.0, 128.5, 128.1, 127.6, 126.1, 124.9, 123.7, 123.1, 111.5, 43.4, 43.1, 42.6, 21.5.

**HRMS (ESI)** *m/z* calculated for C<sub>30</sub>H<sub>23</sub>ClN<sub>2</sub>O<sub>3</sub>S+Na<sup>+</sup>: 549.1010(<sup>35</sup>Cl), 550.1044 (<sup>37</sup>Cl), found: 549.1018, 550.1052.

**N-((Z)-2-benzoyl-5'-methoxy-3-phenylspiro[cyclopropane-1,3'-indolin]-2'-ylidene)-4-methylbenzenesulfonamide 3s**

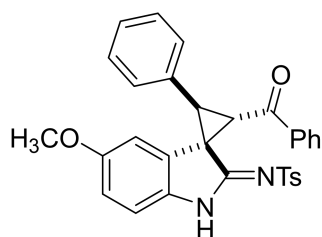

Prepared according to the **General Procedure A** to afford **3s** (39.2 mg) in 75% yield as white solid, m.p. = 178 – 180 °C. The diastereomeric ratio was determined to be 5:1 by crude <sup>1</sup>H-NMR analysis.

*NMR and HRMS data for the product 3s:*

**<sup>1</sup>H NMR (600 MHz, CDCl<sub>3</sub>)** δ (ppm): 10.02 (s, 1H), 7.94 (d, *J* = 6.6 Hz, 2H), 7.56 (t, *J* = 7.8 Hz, 1H), 7.46 – 7.41 (m, 2H), 7.28 (d, *J* = 8.4 Hz, 2H), 7.16 (d, *J* = 7.2 Hz, 2H), 7.12 – 7.05 (m, 5H), 6.92 (d, *J* = 8.4 Hz, 1H), 6.89 (d, *J* = 2.4 Hz, 1H), 6.74 (d, *J* = 8.4 Hz, 1H), 4.47 (d, *J* =

9.0 Hz, 1H), 4.20 (d,  $J = 9.0$  Hz, 1H), 3.76 (s, 3H), 2.39 (s, 3H).

$^{13}\text{C}$  NMR (150 MHz,  $\text{CDCl}_3$ )  $\delta$  (ppm): 192.1, 165.6, 156.5, 142.4, 138.9, 136.6, 134.4, 133.9, 131.9, 129.5, 129.1, 128.9, 128.5, 127.9, 127.5, 126.0, 113.4, 111.4, 108.4, 55.8, 44.0, 42.9, 42.5, 21.5.

HRMS (ESI)  $m/z$  calculated for  $\text{C}_{31}\text{H}_{26}\text{N}_2\text{O}_4\text{S}+\text{Na}^+$ : 545.1505, found: 545.1510.

**N-((Z)-2-(4-fluorobenzoyl)-3-phenylspiro[cyclopropane-1,3'-indolin]-2'-ylidene)-4-methylbenzenesulfonamide 3t**

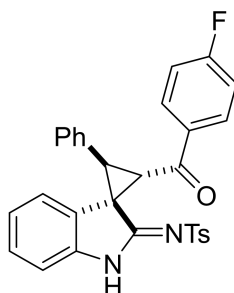

Prepared according to the *General Procedure A* to afford **3t** (39.8 mg) in 78% yield as light yellow solid, m.p. = 223 – 226 °C. The diastereomeric ratio was determined to be 8:1 by crude  $^1\text{H}$ -NMR analysis.

*NMR and HRMS data for the product 3t:*

$^1\text{H}$  NMR (600 MHz,  $\text{CDCl}_3$ )  $\delta$  (ppm): 10.13 (s, 1H), 7.98 – 7.93 (m, 2H), 7.28 (d,  $J = 8.4$  Hz, 2H), 7.25 – 7.20 (m, 2H), 7.15 (d,  $J = 6.6$  Hz, 2H), 7.12 – 7.02 (m, 9H), 4.41 (d,  $J = 9.0$  Hz, 1H), 4.23 (d,  $J = 9.0$  Hz, 1H), 2.40 (s, 3H).

$^{13}\text{C}$  NMR (150 MHz,  $\text{CDCl}_3$ )  $\delta$  (ppm): 190.6, 166.2 (d,  $J = 255.8$  Hz, 1C), 165.5, 142.5, 140.9, 138.6, 133.0, 131.8, 131.2 (d,  $J = 10.0$  Hz, 1C), 129.5, 129.1, 128.0, 127.9, 127.5, 126.3, 126.1, 123.7, 122.0, 116.1 (d,  $J = 21.6$  Hz, 1C), 111.0, 43.7, 42.9, 42.3, 21.5.

HRMS (ESI)  $m/z$  calculated for  $\text{C}_{30}\text{H}_{23}\text{FN}_2\text{O}_3\text{S}+\text{Na}^+$ : 533.1306, found: 533.1306.

**N-((Z)-2-(4-chlorobenzoyl)-3-phenylspiro[cyclopropane-1,3'-indolin]-2'-ylidene)-4-methylbenzenesulfonamide 3u**

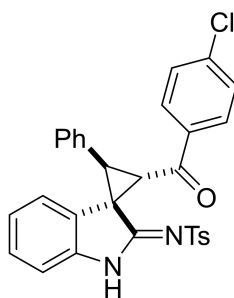

Prepared according to the **General Procedure A** to afford **3u** (37.9 mg) in 72% yield as white solid, m.p. = 247 – 249 °C. The diastereomeric ratio was determined to be 10:1 by crude <sup>1</sup>H-NMR analysis.

Prepared according to the **General Procedure B** to afford chiral **3u** (23.7 mg) in 45% yield as white solid. The diastereomeric ratio was determined to be 2:1 by crude <sup>1</sup>H-NMR analysis.

*NMR and HRMS data for the product 3u:*

<sup>1</sup>H NMR (600 MHz, CDCl<sub>3</sub>) δ (ppm): 10.13 (s, 1H), 7.84 (d, *J* = 8.4 Hz, 2H), 7.34 (d, *J* = 9.0 Hz, 2H), 7.29 (d, *J* = 8.4 Hz, 2H), 7.24 – 7.21 (m, 2H), 7.15 (d, *J* = 6.6 Hz, 2H), 7.12 – 7.06 (m, 5H), 7.05 (d, *J* = 8.4 Hz, 2H), 4.40 (d, *J* = 9.0 Hz, 1H), 4.23 (d, *J* = 9.0 Hz, 1H), 2.40 (s, 3H).

<sup>13</sup>C NMR (150 MHz, CDCl<sub>3</sub>) δ (ppm): 191.0, 165.4, 142.6, 140.9, 140.5, 138.6, 134.8, 131.7, 129.8, 129.5, 129.2, 129.1, 128.1, 127.9, 127.5, 126.2, 126.1, 123.7, 121.9, 111.0, 43.7, 42.9, 42.3, 21.5.

HRMS (ESI) *m/z* calculated for C<sub>30</sub>H<sub>23</sub>ClN<sub>2</sub>O<sub>3</sub>S+Na<sup>+</sup>: 549.1010(<sup>35</sup>Cl), 550.1044 (<sup>37</sup>Cl), found: 549.1012, 550.1042.

**4-methyl-N-((Z)-2-(4-methylbenzoyl)-3-phenylspiro[cyclopropane-1,3'-indolin]-2'-ylidene)benzenesulfonamide 3v**

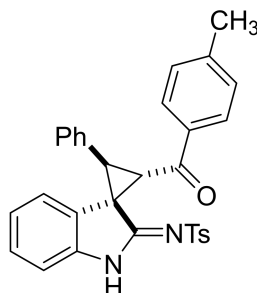

Prepared according to the **General Procedure A** to afford **3v** (38.0 mg) in 75% yield as light yellow solid, m.p. = 226 – 228 °C. The diastereomeric ratio was determined to be 2:1 by crude <sup>1</sup>H-NMR analysis.

Prepared according to the **General Procedure B** to afford chiral **3v** (24.3 mg) in 48% yield as light yellow solid. The diastereomeric ratio was determined to be 2:1 by crude <sup>1</sup>H-NMR analysis.

*NMR and HRMS data for the product 3v:*

<sup>1</sup>H NMR (600 MHz, CDCl<sub>3</sub>) δ (ppm): 10.10 (s, 1H), 7.82 (d, *J* = 8.4 Hz, 2H), 7.30 – 7.26 (m, 3H), 7.22 – 7.14 (m, 5H), 7.10 – 7.06 (m, 5H), 7.05 – 7.01 (m, 2H), 4.44 (d, *J* = 9.0 Hz, 1H), 4.24 (d, *J* = 9.0 Hz, 1H), 2.39 (s, 3H), 2.37 (s, 3H).

<sup>13</sup>C NMR (150 MHz, CDCl<sub>3</sub>) δ (ppm): 191.6, 165.7, 145.0, 142.5, 140.8, 138.7, 134.1, 132.0, 129.6, 129.1, 128.6, 127.9, 127.8, 127.4, 126.6, 126.1, 123.6, 122.1, 110.9, 43.6, 43.1, 42.3, 21.7, 21.5.

HRMS (ESI) *m/z* calculated for C<sub>31</sub>H<sub>26</sub>N<sub>2</sub>O<sub>3</sub>S+Na<sup>+</sup>: 529.1556, found: 529.1560.

**N-((Z)-2-(4-methoxybenzoyl)-3-phenylspiro[cyclopropane-1,3'-indolin]-2'-ylidene)-4-methylbenzenesulfonamide 3w**

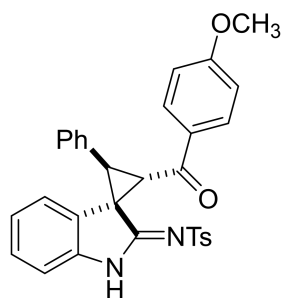

Prepared according to the **General Procedure A** to afford **3w** (44.4 mg) in 85% yield as light yellow solid, m.p. = 233 – 236 °C. The diastereomeric ratio was determined to be 3:1 by crude <sup>1</sup>H-NMR analysis.

*NMR and HRMS data for the product 3w:*

<sup>1</sup>H NMR (600 MHz, CDCl<sub>3</sub>) δ (ppm): 10.07 (s, 1H), 7.91 (d, *J* = 9.0 Hz, 2H), 7.28 – 7.27 (m, 3H), 7.23 – 7.19 (m, 1H), 7.17 – 7.14 (m, 2H), 7.10 – 7.06 (m, 5H), 7.05 – 7.00 (m, 2H), 6.87 (d, *J* = 9.0 Hz, 2H), 4.42 (d, *J* = 9.0 Hz, 1H), 4.23 (d, *J* = 9.0 Hz, 1H), 3.83 (s, 3H), 2.39 (s, 3H).

<sup>13</sup>C NMR (150 MHz, CDCl<sub>3</sub>) δ (ppm): 190.3, 165.8, 164.2, 142.5, 140.8, 138.7, 132.1, 130.9, 129.7, 129.5, 129.1, 127.9, 127.8, 127.4, 126.7, 126.0, 123.6, 122.1, 114.1, 110.8, 55.5, 43.5, 43.0, 42.3, 21.5.

**HRMS (ESI)**  $m/z$  calculated for  $C_{31}H_{26}N_2O_4S+Na^+$ : 545.1505, found: 545.1511.

**N-((Z)-2-(3-chlorobenzoyl)-3-phenylspiro[cyclopropane-1,3'-indolin]-2'-ylidene)-4-methylbenzenesulfonamide 3x**

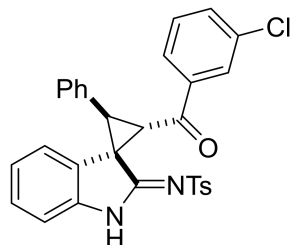

Prepared according to the *General Procedure A* to afford **3x** (28.5 mg) in 54% yield as light yellow solid, m.p. = 237 – 240 °C. The diastereomeric ratio was determined to be 20:1 by crude  $^1H$ -NMR analysis.

Prepared according to the *General Procedure B* to afford chiral **3x** (27.4 mg) in 52% yield as light yellow solid. The diastereomeric ratio was determined to be 7:1 by crude  $^1H$ -NMR analysis.

*NMR and HRMS data for the product 3x:*

$^1H$  NMR (600 MHz,  $CDCl_3$ )  $\delta$  (ppm): 10.09 (s, 1H), 7.95 – 7.93 (m, 1H), 7.79 – 7.75 (m, 1H), 7.54 – 7.50 (m, 1H), 7.36 (t,  $J = 7.8$  Hz, 1H), 7.29 (d,  $J = 8.4$  Hz, 2H), 7.27 – 7.22 (m, 2H), 7.15 (d,  $J = 6.6$  Hz, 2H), 7.11 – 7.02 (m, 7H), 4.40 (d,  $J = 8.4$  Hz, 1H), 4.24 (d,  $J = 8.4$  Hz, 1H), 2.39 (s, 3H).

$^{13}C$  NMR (150 MHz,  $CDCl_3$ )  $\delta$  (ppm): 191.1, 165.3, 142.6, 140.9, 138.6, 138.0, 135.3, 133.9, 131.7, 130.3, 129.5, 129.1, 128.3, 128.1, 128.0, 127.6, 126.8, 126.2, 126.1, 123.7, 122.0, 111.0, 43.9, 42.9, 42.4, 21.5.

**HRMS (ESI)**  $m/z$  calculated for  $C_{30}H_{23}ClN_2O_3S+Na^+$ : 549.1010( $^{35}Cl$ ), 550.1044 ( $^{37}Cl$ ), found: 549.1016, 550.1048.

**N-((Z)-2-(3-methoxybenzoyl)-3-phenylspiro[cyclopropane-1,3'-indolin]-2'-ylidene)-4-methylbenzenesulfonamide 3y**

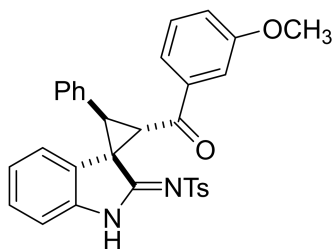

Prepared according to the **General Procedure A** to afford **3y** (45.4 mg) in 87% yield as white solid, m.p. = 189 – 194 °C. The diastereomeric ratio was determined to be 6:1 by crude <sup>1</sup>H-NMR analysis.

*NMR and HRMS data for the product 3y:*

**<sup>1</sup>H NMR (600 MHz, CDCl<sub>3</sub>)** δ (ppm): 10.07 (s, 1H), 7.50 (d, *J* = 7.8 Hz, 1H), 7.47 – 7.46 (m, 1H), 7.33 – 7.27 (m, 4H), 7.24 – 7.20 (m, 1H), 7.16 (d, *J* = 6.6 Hz, 2H), 7.11 – 7.07 (m, 6H), 7.05 – 7.01 (m, 2H), 4.46 (d, *J* = 9.0 Hz, 1H), 4.24 (d, *J* = 9.0 Hz, 1H), 3.82 (s, 3H), 2.39 (s, 3H).

**<sup>13</sup>C NMR (150 MHz, CDCl<sub>3</sub>)** δ (ppm): 192.0, 165.6, 159.9, 142.5, 140.9, 138.7, 137.8, 131.9, 129.9, 129.5, 129.1, 127.9, 127.5, 126.4, 126.0, 123.7, 122.0, 121.3, 121.0, 111.9, 110.9, 55.4, 43.8, 43.4, 42.4, 21.5.

**HRMS (ESI)** *m/z* calculated for C<sub>31</sub>H<sub>26</sub>N<sub>2</sub>O<sub>4</sub>S+Na<sup>+</sup>: 545.1505, found: 545.1504.

**N-((Z)-2-(2-chlorobenzoyl)-3-phenylspiro[cyclopropane-1,3'-indolin]-2'-ylidene)-4-methylbenzenesulfonamide 3z**

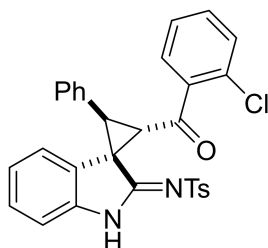

Prepared according to the **General Procedure A** to afford **3z** (34.8 mg) in 66% yield as white solid, m.p. = 200 – 204 °C. The diastereomeric ratio was determined to be 20:1 by crude <sup>1</sup>H-NMR analysis.

*NMR and HRMS data for the product 3z:*

**<sup>1</sup>H NMR (600 MHz, CDCl<sub>3</sub>)** δ (ppm): 10.08 (s, 1H), 7.49 – 7.46 (m, 2H), 7.42 – 7.35 (m, 2H), 7.31 – 7.27 (m, 2H), 7.25 (d, *J* = 8.4 Hz, 2H), 7.17 – 7.14 (m, 2H), 7.11 – 7.04 (m, 7H), 4.32 (d, *J* = 9.0 Hz, 1H), 4.30 (d, *J* = 8.4 Hz, 1H), 2.38 (s, 3H).

**<sup>13</sup>C NMR (150 MHz, CDCl<sub>3</sub>)** δ (ppm): 194.2, 165.5, 142.4, 141.1, 138.7, 138.1, 132.9, 132.3,

131.8, 130.9, 130.1, 129.5, 129.0, 128.1, 127.9, 127.4, 127.1, 126.4, 126.1, 123.6, 122.8, 110.9, 47.0, 45.4, 42.9, 21.5.

**HRMS (ESI)** m/z calculated for  $C_{30}H_{23}ClN_2O_3S+Na^+$ : 549.1010( $^{35}Cl$ ), 550.1044 ( $^{37}Cl$ ), found: 549.1018, 550.1037.

**4-methyl-N-((Z)-2-(2-methylbenzoyl)-3-phenylspiro[cyclopropane-1,3'-indolin]-2'-ylidene) benzenesulfonamide 3aa**

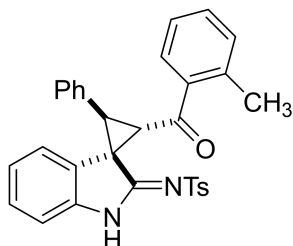

Prepared according to the *General Procedure A* to afford **3aa** (45.0 mg) in 89% yield as light yellow solid, m.p. = 214 – 215 °C. The diastereomeric ratio was determined to be 18:1 by crude  $^1H$ -NMR analysis.

Prepared according to the *General Procedure B* to afford chiral **3aa** (21.8 mg) in 43% yield as light yellow solid. The diastereomeric ratio was determined to be 2:1 by crude  $^1H$ -NMR analysis.

*NMR and HRMS data for the product 3aa:*

$^1H$  NMR (600 MHz,  $CDCl_3$ )  $\delta$  (ppm): 10.12 (s, 1H), 7.56 (d,  $J = 7.2$  Hz, 1H), 7.40 – 7.34 (m, 2H), 7.28 – 7.19 (m, 5H), 7.17 – 7.14 (m, 2H), 7.11 – 7.04 (m, 7H), 4.30 (d,  $J = 9.0$  Hz, 1H), 4.26 (d,  $J = 9.0$  Hz, 1H), 2.49 (s, 3H), 2.39 (s, 3H).

$^{13}C$  NMR (150 MHz,  $CDCl_3$ )  $\delta$  (ppm): 195.1, 165.5, 142.5, 140.9, 138.9, 138.7, 137.1, 132.3, 132.0, 131.9, 129.6, 129.4, 129.1, 128.0, 127.9, 127.4, 126.5, 126.2, 126.0, 123.6, 122.5, 110.9, 45.7, 44.4, 42.6, 21.5, 21.3.

**HRMS (ESI)** m/z calculated for  $C_{31}H_{26}N_2O_3S+Na^+$ : 529.1556, found: 529.1552.

**N-((Z)-2-(furan-2-carbonyl)-3-phenylspiro[cyclopropane-1,3'-indolin]-2'-ylidene)-4-methylbenzenesulfonamide 3ab**



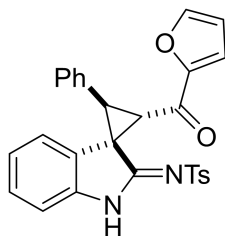

Prepared according to the **General Procedure A** to afford **3ab** (36.2 mg) in 75% yield as white solid, m.p. = 198 – 199 °C. The diastereomeric ratio was determined to be 5:1 by crude <sup>1</sup>H-NMR analysis.

*NMR and HRMS data for the product 3ab:*

**<sup>1</sup>H NMR (600 MHz, CDCl<sub>3</sub>)** δ (ppm): 10.11 (s, 1H), 7.60 (d, *J* = 1.2 Hz, 1H), 7.45 (d, *J* = 7.2 Hz, 1H), 7.29 (d, *J* = 3.6 Hz, 1H), 7.27 – 7.21 (m, 3H), 7.15 (d, *J* = 6.6 Hz, 2H), 7.11 – 7.05 (m, 6H), 7.04 (d, *J* = 7.8 Hz, 1H), 6.51 (dd, *J* = 3.6, 1.2 Hz, 1H), 4.37 (d, *J* = 9.0 Hz, 1H), 4.21 (d, *J* = 9.0 Hz, 1H), 2.38 (s, 3H).

**<sup>13</sup>C NMR (150 MHz, CDCl<sub>3</sub>)** δ (ppm): 180.4, 165.6, 152.5, 147.6, 142.4, 141.0, 138.7, 131.8, 129.5, 129.0, 127.9, 127.9, 127.4, 126.4, 126.0, 123.6, 122.7, 119.1, 112.7, 110.9, 44.1, 42.8, 41.9, 21.4.

**HRMS (ESI)** m/z calculated for C<sub>28</sub>H<sub>22</sub>N<sub>2</sub>O<sub>4</sub>S+Na<sup>+</sup>: 505.1192, found: 505.1195.

**4-methyl-N-((Z)-2-phenyl-3-(thiophene-2-carbonyl)spiro[cyclopropane-1,3'-indolin]-2'-ylidene)benzenesulfonamide 3ac**

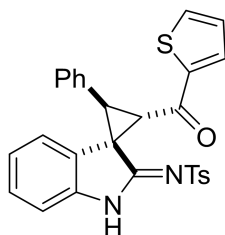

Prepared according to the **General Procedure A** to afford **3ac** (44.3 mg) in 89% yield as light yellow solid, m.p. = 197 – 200 °C. The diastereomeric ratio was determined to be 4:1 by crude <sup>1</sup>H-NMR analysis.

Prepared according to the **General Procedure B** to afford chiral **3ac** (34.4 mg) in 69% yield as light yellow solid. The diastereomeric ratio was determined to be 4:1 by crude <sup>1</sup>H-NMR analysis.

*NMR and HRMS data for the product 3ac:*

**<sup>1</sup>H NMR (600 MHz, CDCl<sub>3</sub>)** δ (ppm): 10.12 (s, 1H), 7.76 (d, *J* = 3.0 Hz, 1H), 7.64 (d, *J* = 4.8

Hz, 1H), 7.38 (d,  $J = 7.8$  Hz, 1H), 7.28 (d,  $J = 8.4$  Hz, 2H), 7.23 (t,  $J = 7.8$  Hz, 1H), 7.15 (d,  $J = 6.6$  Hz, 2H), 7.11 – 7.05 (m, 8H), 4.37 (d,  $J = 9.0$  Hz, 1H), 4.21 (d,  $J = 9.0$  Hz, 1H), 2.39 (s, 3H).

$^{13}\text{C}$  NMR (150 MHz,  $\text{CDCl}_3$ )  $\delta$  (ppm): 184.6, 165.6, 143.9, 142.5, 141.0, 138.7, 135.1, 133.5, 131.8, 129.5, 129.1, 128.6, 127.9, 127.5, 126.4, 126.0, 123.7, 122.4, 110.9, 43.9, 43.7, 42.3, 21.5.

HRMS (ESI)  $m/z$  calculated for  $\text{C}_{28}\text{H}_{22}\text{N}_2\text{O}_3\text{S}_2+\text{Na}^+$ : 521.0964, found: 521.0967.

**N-((Z)-2-(1-naphthoyl)-3-phenylspiro[cyclopropane-1,3'-indolin]-2'-ylidene)-4-methylbenzenesulfonamide 3ad**

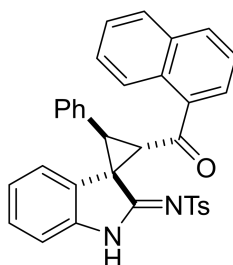

Prepared according to the *General Procedure A* to afford **3ad** (33.1 mg) in 61% yield as white solid, m.p. = 219 – 221 °C. The diastereomeric ratio was determined to be 20:1 by crude  $^1\text{H}$ -NMR analysis.

*NMR and HRMS data for the product 3ad:*

$^1\text{H}$  NMR (600 MHz,  $\text{CDCl}_3$ )  $\delta$  (ppm): 10.16 (s, 1H), 8.78 (d,  $J = 8.4$  Hz, 1H), 7.97 (d,  $J = 7.8$  Hz, 1H), 7.85 (d,  $J = 7.8$  Hz, 1H), 7.83 (d,  $J = 6.0$  Hz, 1H), 7.65 – 7.60 (m, 1H), 7.55 (t,  $J = 7.8$  Hz, 1H), 7.46 (d,  $J = 7.8$  Hz, 1H), 7.41 (t,  $J = 7.8$  Hz, 1H), 7.28 (d,  $J = 9.0$  Hz, 2H), 7.24 (t,  $J = 7.8$  Hz, 1H), 7.19 (d,  $J = 7.8$  Hz, 2H), 7.12 – 7.02 (m, 7H), 4.47 (d,  $J = 9.0$  Hz, 1H), 4.37 (d,  $J = 8.4$  Hz, 1H), 2.39 (s, 3H).

$^{13}\text{C}$  NMR (150 MHz,  $\text{CDCl}_3$ )  $\delta$  (ppm): 194.7, 165.5, 142.5, 141.0, 138.7, 134.4, 134.0, 133.9, 131.9, 130.3, 129.7, 129.6, 129.1, 128.6, 128.5, 128.0, 127.9, 127.5, 126.7, 126.6, 126.1, 125.5, 124.6, 123.7, 122.6, 110.9, 46.0, 44.7, 42.7, 21.5.

HRMS (ESI)  $m/z$  calculated for  $\text{C}_{34}\text{H}_{26}\text{N}_2\text{O}_3\text{S}+\text{Na}^+$ : 565.1556, found: 565.1553.

**N-((Z)-2-(2-naphthoyl)-3-phenylspiro[cyclopropane-1,3'-indolin]-2'-ylidene)-4-methylbenzenesulfonamide 3ae**

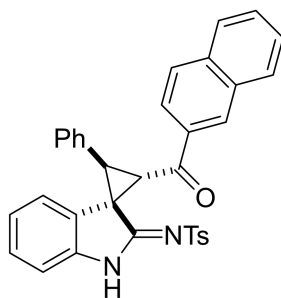

Prepared according to the **General Procedure A** to afford **3ae** (45.0 mg) in 83% yield as light yellow solid, m.p. = 242 – 244 °C. The diastereomeric ratio was determined to be 6:1 by crude <sup>1</sup>H-NMR analysis.

Prepared according to the **General Procedure B** to afford chiral **3ae** (22.8 mg) in 42% yield as light yellow solid. The diastereomeric ratio was determined to be 4:1 by crude <sup>1</sup>H-NMR analysis.

*NMR and HRMS data for the product 3ae:*

**<sup>1</sup>H NMR (600 MHz, CDCl<sub>3</sub>)** δ (ppm): 10.20 (s, 1H), 8.44 (s, 1H), 7.99 – 7.96 (m, 1H), 7.86 (d, *J* = 8.4 Hz, 1H), 7.79 (d, *J* = 8.4 Hz, 2H), 7.56 (t, *J* = 7.2 Hz, 1H), 7.48 (d, *J* = 7.8 Hz, 1H), 7.37 – 7.31 (m, 3H), 7.23 – 7.17 (m, 3H), 7.15 – 7.08 (m, 5H), 7.07 – 7.02 (m, 2H), 4.64 (d, *J* = 9.0 Hz, 1H), 4.32 (d, *J* = 9.0 Hz, 1H), 2.41 (s, 3H).

**<sup>13</sup>C NMR (150 MHz, CDCl<sub>3</sub>)** δ (ppm): 191.9, 165.7, 142.5, 141.0, 138.8, 135.8, 133.8, 132.3, 132.0, 130.8, 129.9, 129.6, 129.1, 128.9, 128.8, 127.9, 127.6, 127.5, 126.9, 126.5, 126.1, 123.6, 123.6, 122.0, 111.0, 43.9, 43.4, 42.5, 21.5.

**HRMS (ESI)** m/z calculated for C<sub>34</sub>H<sub>26</sub>N<sub>2</sub>O<sub>3</sub>S+Na<sup>+</sup>: 565.1556, found: 565.1557.

#### **4-methyl-N-((Z)-2-phenylspiro[cyclopropane-1,3'-indolin]-2'-ylidene)benzenesulfonamide**

##### **5a**

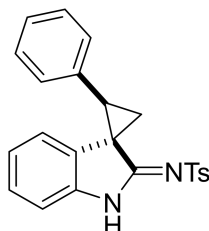

Prepared according to the **General Procedure A** to afford **5a** (34.1 mg) in 88% yield as light yellow solid, m.p. = 99 – 103 °C. The diastereomeric ratio was determined to be >20:1 by crude <sup>1</sup>H-NMR analysis.

*NMR and HRMS data for the product 5a:*

**<sup>1</sup>H NMR (600 MHz, CDCl<sub>3</sub>)** δ (ppm): 10.17 (s, 1H), 7.88 (d, *J* = 7.8 Hz, 2H), 7.31 – 7.26 (m, 5H), 7.16 – 7.11 (m, 3H), 7.07 (d, *J* = 7.8 Hz, 1H), 6.72 (t, *J* = 7.8 Hz, 1H), 5.97 (d, *J* = 7.2 Hz, 1H), 3.46 (t, *J* = 9.0 Hz, 1H), 2.42 (s, 3H), 2.29 (dd, *J* = 7.8, 4.8 Hz, 1H), 2.16 (dd, *J* = 8.4, 4.8 Hz, 1H).

**<sup>13</sup>C NMR (150 MHz, CDCl<sub>3</sub>)** δ (ppm): 170.4, 143.0, 140.9, 139.4, 134.3, 129.9, 129.4, 128.4, 127.8, 127.7, 127.0, 126.3, 122.8, 120.8, 110.8, 39.6, 36.7, 25.6, 21.5.

**HRMS (ESI)** *m/z* calculated for C<sub>23</sub>H<sub>20</sub>N<sub>2</sub>O<sub>2</sub>S+Na<sup>+</sup>: 411.1138, found: 411.1139.

**N-((Z)-2-(4-chlorophenyl)spiro[cyclopropane-1,3'-indolin]-2'-ylidene)-4-methylbenzenesulfonamide 5b**

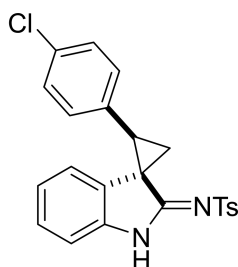

Prepared according to the *General Procedure A* to afford **5b** (35.9 mg) in 85% yield as light yellow solid, m.p. = 192 – 196 °C. The diastereomeric ratio was determined to be >20:1 by crude <sup>1</sup>H-NMR analysis.

*NMR and HRMS data for the product 5b:*

**<sup>1</sup>H NMR (600 MHz, CDCl<sub>3</sub>)** δ (ppm): 10.15 (s, 1H), 7.87 (d, *J* = 9.0 Hz, 2H), 7.30 (d, *J* = 7.8 Hz, 2H), 7.27 – 7.24 (m, 2H), 7.16 (t, *J* = 7.8 Hz, 1H), 7.09 – 7.04 (m, 3H), 6.78 (t, *J* = 7.2 Hz, 1H), 5.97 (d, *J* = 7.8 Hz, 1H), 3.38 (t, *J* = 9.0 Hz, 1H), 2.42 (s, 3H), 2.28 (dd, *J* = 8.4, 4.8 Hz, 1H), 2.09 (dd, *J* = 8.4, 4.8 Hz, 1H).

**<sup>13</sup>C NMR (150 MHz, CDCl<sub>3</sub>)** δ (ppm): 170.1, 143.1, 141.0, 139.2, 133.7, 132.9, 131.3, 129.4, 128.7, 127.4, 127.2, 126.3, 122.9, 120.8, 111.0, 38.6, 36.6, 25.5, 21.5.

**HRMS (ESI)** *m/z* calculated for C<sub>23</sub>H<sub>19</sub>ClN<sub>2</sub>O<sub>2</sub>S+Na<sup>+</sup>: 445.0748(<sup>35</sup>Cl), 447.0718 (<sup>37</sup>Cl), found: 445.0743, 447.0715.

**4-methyl-N-((Z)-2-(p-tolyl)spiro[cyclopropane-1,3'-indolin]-2'-ylidene)benzenesulfonamide 5c**

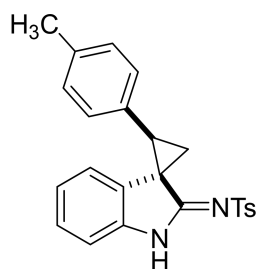

Prepared according to the **General Procedure A** to afford **5c** (31.0 mg) in 77% yield as light yellow solid, m.p. = 116 – 120 °C. The diastereomeric ratio was determined to be >20:1 by crude <sup>1</sup>H-NMR analysis.

*NMR and HRMS data for the product 5c:*

**<sup>1</sup>H NMR (600 MHz, CDCl<sub>3</sub>)** δ (ppm): 10.15 (s, 1H), 7.88 (d, *J* = 8.4 Hz, 2H), 7.29 (d, *J* = 7.2 Hz, 2H), 7.16 – 7.11 (m, 1H), 7.09 – 7.04 (m, 3H), 7.00 (d, *J* = 8.4 Hz, 2H), 6.74 (t, *J* = 7.8 Hz, 1H), 6.01 (d, *J* = 7.2 Hz, 1H), 3.42 (t, *J* = 7.8 Hz, 1H), 2.42 (s, 3H), 2.32 (s, 3H), 2.27 (dd, *J* = 9.0, 4.2 Hz, 1H), 2.14 (dd, *J* = 7.8, 3.6 Hz, 1H).

**<sup>13</sup>C NMR (150 MHz, CDCl<sub>3</sub>)** δ (ppm): 170.5, 142.9, 140.9, 139.4, 137.5, 131.2, 129.7, 129.4, 129.1, 127.9, 126.9, 126.3, 122.8, 120.9, 110.8, 39.6, 36.8, 25.8, 21.5, 21.2.

**HRMS (ESI)** m/z calculated for C<sub>24</sub>H<sub>22</sub>N<sub>2</sub>O<sub>2</sub>S+Na<sup>+</sup>:425.1294, found: 425.1293.

**N-((Z)-2-(3-chlorophenyl)spiro[cyclopropane-1,3'-indolin]-2'-ylidene)-4-methylbenzenesulfonamide 5d**

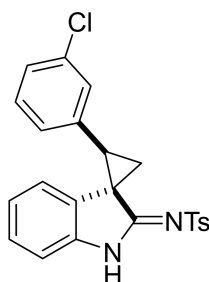

Prepared according to the **General Procedure A** to afford **5d** (37.6 mg) in 89% yield as light yellow solid, m.p. = 182 – 185 °C. The diastereomeric ratio was determined to be >20:1 by crude <sup>1</sup>H-NMR analysis.

*NMR and HRMS data for the product 5d:*

**<sup>1</sup>H NMR (600 MHz, CDCl<sub>3</sub>)** δ (ppm): 10.17 (s, 1H), 7.88 (d, *J* = 7.8 Hz, 2H), 7.30 (d, *J* = 8.4 Hz, 2H), 7.25 – 7.23 (m, 1H), 7.22 – 7.14 (m, 3H), 7.08 (d, *J* = 7.8 Hz, 1H), 6.98 (d, *J* = 7.2 Hz, 1H), 6.77 (t, *J* = 7.2 Hz, 1H), 6.00 (d, *J* = 7.8 Hz, 1H), 3.39 (t, *J* = 9.0 Hz, 1H), 2.42 (s, 3H),

2.27 (dd,  $J = 9.6, 4.8$  Hz, 1H), 2.11 (dd,  $J = 9.0, 4.8$  Hz, 1H).

$^{13}\text{C}$  NMR (150 MHz,  $\text{CDCl}_3$ )  $\delta$  (ppm): 170.0, 143.1, 141.0, 139.2, 136.4, 134.3, 129.8, 129.7, 129.5, 128.3, 128.0, 127.3, 126.3, 122.9, 120.8, 111.0, 38.6, 36.6, 25.3, 21.5.

HRMS (ESI)  $m/z$  calculated for  $\text{C}_{23}\text{H}_{19}\text{ClN}_2\text{O}_2\text{S}+\text{Na}^+$ : 445.0748( $^{35}\text{Cl}$ ), 447.0718 ( $^{37}\text{Cl}$ ), found: 445.0740, 447.0721.

**4-methyl-N-((Z)-2-(m-tolyl)spiro[cyclopropane-1,3'-indolin]-2'-ylidene)benzenesulfonamide 5e**

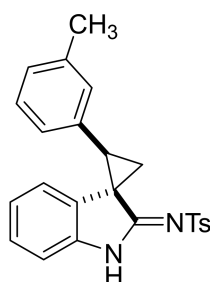

Prepared according to the *General Procedure A* to afford **5e** (32.6 mg) in 81% yield as light yellow solid, m.p. = 140 – 142 °C. The diastereomeric ratio was determined to be >20:1 by crude  $^1\text{H}$ -NMR analysis.

*NMR and HRMS data for the product 5e:*

$^1\text{H}$  NMR (600 MHz,  $\text{CDCl}_3$ )  $\delta$  (ppm): 10.17 (s, 1H), 7.89 (d,  $J = 8.4$  Hz, 2H), 7.29 (d,  $J = 8.4$  Hz, 2H), 7.18 – 7.11 (m, 2H), 7.07 (d,  $J = 7.8$  Hz, 2H), 6.97 – 6.89 (m, 2H), 6.74 (t,  $J = 7.8$  Hz, 1H), 6.01 (d,  $J = 7.2$  Hz, 1H), 3.43 (t,  $J = 9.0$  Hz, 1H), 2.42 (s, 3H), 2.28 (s, 3H), 2.26 (dd,  $J = 9.6, 4.8$  Hz, 1H), 2.15 (dd,  $J = 8.4, 4.2$  Hz, 1H).

$^{13}\text{C}$  NMR (150 MHz,  $\text{CDCl}_3$ )  $\delta$  (ppm): 170.5, 142.9, 140.9, 139.4, 138.1, 134.1, 130.6, 129.4, 128.5, 128.3, 127.9, 126.9, 126.9, 126.3, 122.8, 120.9, 110.8, 39.7, 36.8, 25.7, 21.5, 21.3.

HRMS (ESI)  $m/z$  calculated for  $\text{C}_{24}\text{H}_{22}\text{N}_2\text{O}_2\text{S}+\text{Na}^+$ : 425.1294, found: 425.1295.

**N-((Z)-2-(2-chlorophenyl)spiro[cyclopropane-1,3'-indolin]-2'-ylidene)-4-methylbenzenesulfonamide 5f**

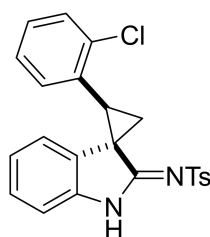

Prepared according to the *General Procedure A* to afford **5f** (32.1 mg) in 76% yield as gray solid, m.p. = 174 – 177 °C. The diastereomeric ratio was determined to be >20:1 by crude <sup>1</sup>H-NMR analysis.

*NMR and HRMS data for the product 5f:*

<sup>1</sup>H NMR (600 MHz, CDCl<sub>3</sub>) δ (ppm): 10.20 (s, 1H), 7.88 (d, *J* = 7.8 Hz, 2H), 7.40 (d, *J* = 6.6 Hz, 1H), 7.33 – 7.27 (m, 3H), 7.24 – 7.17 (m, 2H), 7.16 – 7.12 (m, 1H), 7.07 – 7.04 (m, 1H), 6.69 (t, *J* = 7.8 Hz, 1H), 5.88 (d, *J* = 7.8 Hz, 1H), 3.26 (t, *J* = 9.0 Hz, 1H), 2.42 (dd, *J* = 9.6, 4.8 Hz, 1H), 2.40 (s, 3H), 2.18 (dd, *J* = 9.0, 4.8 Hz, 1H).

<sup>13</sup>C NMR (150 MHz, CDCl<sub>3</sub>) δ (ppm): 170.4, 143.0, 141.1, 139.4, 137.0, 133.0, 130.0, 129.4, 129.2, 127.2, 126.7, 126.2, 122.7, 119.5, 110.9, 38.7, 36.8, 24.4, 21.5.

HRMS (ESI) *m/z* calculated for C<sub>23</sub>H<sub>19</sub>ClN<sub>2</sub>O<sub>2</sub>S+Na<sup>+</sup>: 445.0748(<sup>35</sup>Cl), 447.0718 (<sup>37</sup>Cl), found: 445.0740, 447.0717.

**4-methyl-N-((Z)-2-(o-tolyl)spiro[cyclopropane-1,3'-indolin]-2'-ylidene)benzenesulfonamide 5g**

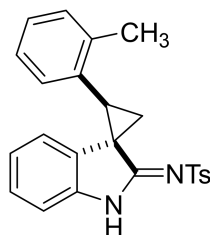

Prepared according to the *General Procedure A* to afford **5g** (30.2 mg) in 75% yield as light yellow solid, m.p. = 173 – 176 °C. The diastereomeric ratio was determined to be >20:1 by crude <sup>1</sup>H-NMR analysis.

*NMR and HRMS data for the product 5g:*

<sup>1</sup>H NMR (600 MHz, CDCl<sub>3</sub>) δ (ppm): 10.21 (s, 1H), 7.87 (d, *J* = 8.4 Hz, 2H), 7.32 (d, *J* = 7.2 Hz, 1H), 7.27 (d, *J* = 8.4 Hz, 2H), 7.22 (t, *J* = 7.2 Hz, 1H), 7.19 – 7.15 (m, 1H), 7.14 – 7.10 (m, 1H), 7.05 (d, *J* = 7.8 Hz, 1H), 6.97 (d, *J* = 7.8 Hz, 1H), 6.67 (t, *J* = 7.2 Hz, 1H), 5.87 (d, *J* = 7.8 Hz, 1H), 3.20 (t, *J* = 9.0 Hz, 1H), 2.40 (s, 3H), 2.36 (dd, *J* = 9.6, 4.8 Hz, 1H), 2.21 (dd, *J* = 8.4, 4.2 Hz, 1H), 1.55 (s, 3H).

<sup>13</sup>C NMR (150 MHz, CDCl<sub>3</sub>) δ (ppm): 170.5, 143.0, 140.6, 139.5, 139.1, 133.1, 129.9, 129.4, 128.4, 128.0, 127.7, 127.0, 126.2, 125.8, 122.8, 120.0, 110.8, 39.3, 36.6, 25.2, 21.5, 18.8.

HRMS (ESI) *m/z* calculated for C<sub>24</sub>H<sub>22</sub>N<sub>2</sub>O<sub>2</sub>S+Na<sup>+</sup>: 425.1294, found: 425.1301.

**N-((Z)-2-(furan-2-yl)spiro[cyclopropane-1,3'-indolin]-2'-ylidene)-4-methylbenzenesulfonamide 5h**

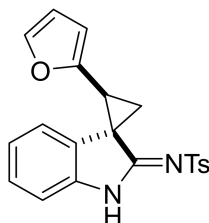

Prepared according to the **General Procedure A** to afford **5h** (29.9 mg) in 79% yield as red solid, m.p. = 140 – 144 °C. The diastereomeric ratio was determined to be >20:1 by crude <sup>1</sup>H-NMR analysis.

*NMR and HRMS data for the product 5h:*

<sup>1</sup>H NMR (600 MHz, CDCl<sub>3</sub>) δ (ppm): 10.07 (s, 1H), 7.86 (d, *J* = 7.8 Hz, 2H), 7.32 – 7.27 (m, 3H), 7.19 (t, *J* = 7.2 Hz, 1H), 7.05 (d, *J* = 7.8 Hz, 1H), 6.87 (t, *J* = 7.8 Hz, 1H), 6.51 (d, *J* = 7.8 Hz, 1H), 6.34 (dd, *J* = 3.6, 1.8 Hz, 1H), 6.28 (d, *J* = 3.6 Hz, 1H), 3.22 (t, *J* = 9.0 Hz, 1H), 2.42 (s, 3H), 2.32 – 2.25 (m, 2H).

<sup>13</sup>C NMR (150 MHz, CDCl<sub>3</sub>) δ (ppm): 169.3, 149.3, 143.1, 142.3, 141.0, 139.2, 129.4, 127.5, 127.4, 126.3, 123.2, 120.2, 110.9, 110.7, 110.0, 37.3, 32.4, 24.0, 21.5.

HRMS (ESI) *m/z* calculated for C<sub>21</sub>H<sub>18</sub>N<sub>2</sub>O<sub>3</sub>S+Na<sup>+</sup>: 401.0930, found: 401.0928.

**4-methyl-N-((Z)-2-(thiophen-2-yl)spiro[cyclopropane-1,3'-indolin]-2'-ylidene)benzenesulfonamide 5i**

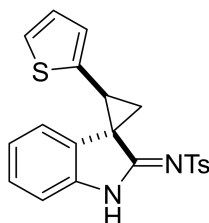

Prepared according to the **General Procedure A** to afford **5i** (29.2 mg) in 74% yield as white solid, m.p. = 134 – 137 °C. The diastereomeric ratio was determined to be >20:1 by crude <sup>1</sup>H-NMR analysis.

*NMR and HRMS data for the product 5i:*

<sup>1</sup>H NMR (600 MHz, CDCl<sub>3</sub>) δ (ppm): 10.12 (s, 1H), 7.87 (d, *J* = 7.8 Hz, 2H), 7.30 (d, *J* = 7.8 Hz, 2H), 7.21 – 7.16 (m, 2H), 7.07 (d, *J* = 7.8 Hz, 1H), 6.95 (dd, *J* = 4.8, 3.6 Hz, 1H), 6.90 –



6.87 (m, 1H), 6.81 (t,  $J = 7.8$  Hz, 1H), 6.25 (d,  $J = 7.8$  Hz, 1H), 3.39 (t,  $J = 9.0$  Hz, 1H), 2.42 (s, 3H), 2.34 (dd,  $J = 9.0, 4.8$  Hz, 1H), 2.18 (dd,  $J = 7.8, 4.8$  Hz, 1H).

$^{13}\text{C}$  NMR (150 MHz,  $\text{CDCl}_3$ )  $\delta$  (ppm): 169.6, 143.1, 141.0, 139.2, 138.0, 129.4, 127.9, 127.3, 127.2, 126.8, 126.3, 125.7, 123.0, 120.4, 110.9, 37.5, 33.8, 26.6, 21.5.

HRMS (ESI)  $m/z$  calculated for  $\text{C}_{21}\text{H}_{18}\text{N}_2\text{O}_2\text{S}_2+\text{Na}^+$ : 417.0702, found: 419.0699.

**4-methyl-N-((Z)-2-(naphthalen-2-yl)spiro[cyclopropane-1,3'-indolin]-2'-ylidene)benzenesulfonamide 5j**

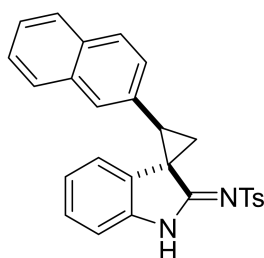

Prepared according to the *General Procedure A* to afford **5j** (31.5 mg) in 72% yield as light yellow solid, m.p. = 189 – 191 °C. The diastereomeric ratio was determined to be >20:1 by crude  $^1\text{H}$ -NMR analysis.

*NMR and HRMS data for the product 5j:*

$^1\text{H}$  NMR (600 MHz,  $\text{CDCl}_3$ )  $\delta$  (ppm): 10.21(s, 1H), 7.91 (d,  $J = 7.8$  Hz, 2H), 7.82 – 7.78 (m, 2H), 7.73 – 7.67 (m, 2H), 7.51 – 7.44 (m, 2H), 7.31 (d,  $J = 8.4$  Hz, 2H), 7.13 – 7.05 (m, 3H), 6.62 (t,  $J = 7.8$  Hz, 1H), 5.96 (d,  $J = 7.2$  Hz, 1H), 3.60 (t,  $J = 9.0$  Hz, 1H), 2.43 (s, 3H), 2.37 (dd,  $J = 9.0, 4.8$  Hz, 1H), 2.30 (dd,  $J = 7.8, 4.8$  Hz, 1H).

$^{13}\text{C}$  NMR (150 MHz,  $\text{CDCl}_3$ )  $\delta$  (ppm): 170.4, 143.0, 140.9, 139.4, 133.1, 132.8, 132.0, 129.4, 128.3, 128.2, 128.0, 127.8, 127.7, 127.7, 127.0, 126.3, 126.2, 122.9, 120.7, 110.9, 39.8, 36.8, 25.7, 21.5.

HRMS (ESI)  $m/z$  calculated for  $\text{C}_{27}\text{H}_{22}\text{N}_2\text{O}_2\text{S}+\text{Na}^+$ :461.1294, found: 461.1294.

#### 4. Procedure for sulphide-catalyzed (2+1) annulation

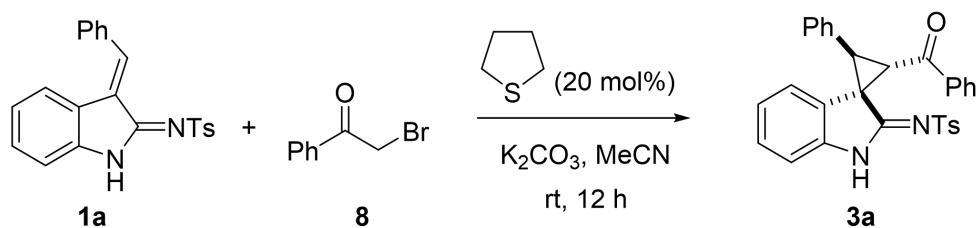

A glass reaction tube was charged with iminoindole **1a** (0.1 mmol), bromide **8** (0.15 mmol), thiophane (0.02 mmol) and K<sub>2</sub>CO<sub>3</sub> (0.12 mmol) in 1.0 mL MeCN. The mixture was stirred at room temperature for 12 hours. Then the mixture was concentrated, and purified by column chromatography on silica gel eluting with petroleum ether/ethyl acetate from 20:1 to 15:1 to afford the corresponding product **3a** (30.5 mg) in 62% yield as light yellow solid. The diastereomeric ratio was determined to be 1:1 by crude <sup>1</sup>H-NMR analysis.

## 5. Investigation for the Rearrangement of 3

### 5.1 General procedure for the ring-opening rearrangement of 3

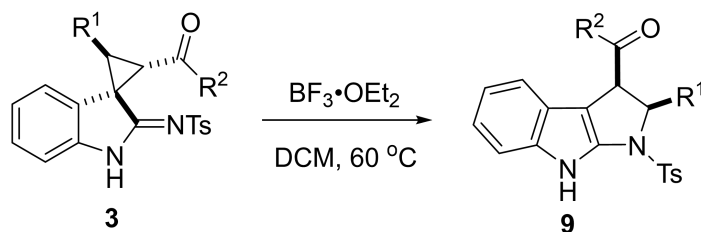

A Schlenk tube was charged with **3** (0.1 mmol),  $\text{BF}_3 \cdot \text{OEt}_2$  **2** (1 mmol),  $\text{H}_2\text{O}$  (0.1 mmol) in 1 mL DCM. The mixture was stirred at 60 °C for 12 hours. Then the mixture was purified by column chromatography on silica gel eluting with petroleum ether/ethyl acetate from 15:1 to 10:1 to afford the corresponding product **9**.

### phenyl(2-phenyl-1-tosyl-1,2,3,8-tetrahydropyrrolo[2,3-b]indol-3-yl)methanone 9a

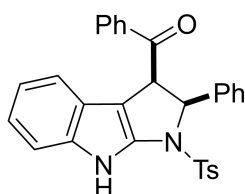

Prepared according to the general procedure to afford **9a** (19.7 mg) in 40% yield as light yellow solid, m.p. = 210 – 214 °C. The diastereomeric ratio was determined to be >20:1 by crude  $^1\text{H-NMR}$  analysis.

*NMR and HRMS data for the product 9a:*

$^1\text{H NMR}$  (600 MHz,  $\text{CDCl}_3$ )  $\delta$  (ppm): 8.86 (s, 1H), 7.87 (d,  $J = 7.8$  Hz, 2H), 7.66 – 7.60 (m, 3H), 7.50 – 7.45 (m, 2H), 7.41 – 7.36 (m, 4H), 7.35 – 7.29 (m, 4H), 7.04 (t,  $J = 7.8$  Hz, 1H), 6.86 (t,  $J = 8.4$  Hz, 1H), 6.57 (d,  $J = 7.2$  Hz, 1H), 5.90 (d,  $J = 3.6$  Hz, 1H), 4.98 (d,  $J = 4.8$  Hz, 1H), 2.46 (s, 3H).

$^{13}\text{C NMR}$  (150 MHz,  $\text{CDCl}_3$ )  $\delta$  (ppm): 195.6, 144.9, 141.4, 141.2, 137.8, 136.2, 133.7, 132.0, 130.0, 128.9, 128.7, 128.7, 128.3, 128.0, 126.4, 123.4, 120.8, 120.7, 117.7, 111.9, 99.5, 72.2, 56.4, 21.7.

**HRMS (ESI)**  $m/z$  calculated for  $\text{C}_{30}\text{H}_{24}\text{N}_2\text{O}_3\text{S} + \text{Na}^+$ : 515.1400, found: 515.1396.

### (2-(4-chlorophenyl)-1-tosyl-1,2,3,8-tetrahydropyrrolo[2,3-b]indol-3-yl)(phenyl)methanone

#### 9b

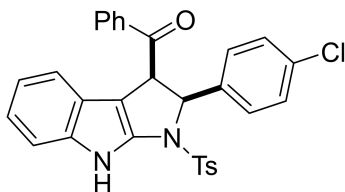

Prepared according to the general procedure to afford **9b** (18.4 mg) in 35% yield as yellow solid, m.p. = 194 – 196 °C. The diastereomeric ratio was determined to be >20:1 by crude <sup>1</sup>H-NMR analysis.

*NMR and HRMS data for the product 9b:*

**<sup>1</sup>H NMR (600 MHz, CDCl<sub>3</sub>)** δ (ppm): 8.83 (s, 1H), 7.87 (d, *J* = 7.8 Hz, 2H), 7.66 – 7.60 (m, 3H), 7.52 – 7.46 (m, 2H), 7.35 – 7.29 (m, 7H), 7.05 (t, *J* = 7.8 Hz, 1H), 6.86 (t, *J* = 7.8 Hz, 1H), 6.55 (d, *J* = 7.8 Hz, 1H), 5.86 (d, *J* = 4.8 Hz, 1H), 4.93 (d, *J* = 4.8 Hz, 1H), 2.46 (s, 3H).

**<sup>13</sup>C NMR (150 MHz, CDCl<sub>3</sub>)** δ (ppm): 195.4, 145.1, 141.2, 139.6, 137.8, 136.1, 134.1, 133.8, 131.8, 130.1, 129.1, 128.8, 128.7, 128.0, 127.9, 123.2, 120.9, 117.7, 111.9, 99.3, 71.5, 56.3, 21.7.

**HRMS (ESI)** m/z calculated for C<sub>30</sub>H<sub>23</sub>ClN<sub>2</sub>O<sub>3</sub>S+Na<sup>+</sup>: 549.1010(<sup>35</sup>Cl), 550.1044 (<sup>37</sup>Cl), found: 549.1018, 550.1054.

**phenyl(2-(p-tolyl)-1-tosyl-1,2,3,8-tetrahydropyrrolo[2,3-b]indol-3-yl)methanone 9c**

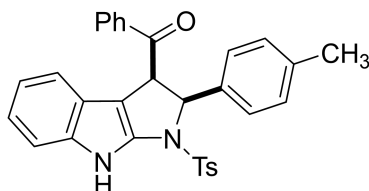

Prepared according to the general procedure to afford **9c** (16.2 mg) in 32% yield as yellow solid, m.p. = 205 – 208 °C. The diastereomeric ratio was determined to be >20:1 by crude <sup>1</sup>H-NMR analysis.

*NMR and HRMS data for the product 9c:*

**<sup>1</sup>H NMR (600 MHz, CDCl<sub>3</sub>)** δ (ppm): 8.85 (s, 1H), 7.86 (d, *J* = 7.8 Hz, 2H), 7.65 – 7.59 (m, 3H), 7.49 – 7.45 (m, 2H), 7.34 – 7.30 (m, 2H), 7.29 – 7.27 (m, 3H), 7.16 (d, *J* = 7.2 Hz, 2H), 7.04 (t, *J* = 7.2 Hz, 1H), 6.86 (t, *J* = 7.2 Hz, 1H), 6.57 (d, *J* = 7.8 Hz, 1H), 5.83 (d, *J* = 4.8 Hz, 1H), 4.97 (d, *J* = 4.8 Hz, 1H), 2.46 (s, 3H), 2.35 (s, 3H).

**<sup>13</sup>C NMR (150 MHz, CDCl<sub>3</sub>)** δ (ppm): 195.7, 144.8, 141.4, 138.2, 138.1, 137.7, 136.2, 133.6, 132.0, 130.0, 129.6, 128.7, 128.7, 128.0, 126.4, 123.4, 120.7, 120.7, 117.6, 111.9, 99.5, 72.2,

56.3, 21.7, 21.2.

**HRMS (ESI)**  $m/z$  calculated for  $C_{31}H_{26}N_2O_3S+Na^+$ : 529.1556, found: 529.1556.

**(4-chlorophenyl)(2-phenyl-1-tosyl-1,2,3,8-tetrahydropyrrolo[2,3-b]indol-3-yl)methanone**

**9d**

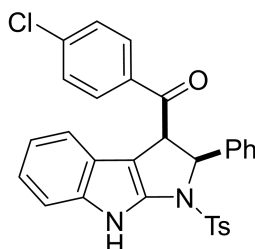

Prepared according to the general procedure to afford **9d** (19.5 mg) in 37% yield as yellow solid, m.p. = 197 – 200 °C. The diastereomeric ratio was determined to be >20:1 by crude  $^1H$ -NMR analysis.

*NMR and HRMS data for the product 9d:*

$^1H$  NMR (600 MHz,  $CDCl_3$ )  $\delta$  (ppm): 8.85 (s, 1H), 7.81 (d,  $J = 9.0$  Hz, 2H), 7.63 (d,  $J = 8.4$  Hz, 2H), 7.44 (d,  $J = 9.0$  Hz, 2H), 7.38 – 7.28 (m, 8H), 7.07 (t,  $J = 7.2$  Hz, 1H), 6.91 (t,  $J = 7.8$  Hz, 1H), 6.62 (d,  $J = 7.8$  Hz, 1H), 5.83 (d,  $J = 4.8$  Hz, 1H), 4.91 (d,  $J = 4.8$  Hz, 1H), 2.46 (s, 3H).

$^{13}C$  NMR (150 MHz,  $CDCl_3$ )  $\delta$  (ppm): 194.5, 144.9, 141.6, 141.0, 140.3, 137.8, 134.4, 132.0, 130.1, 130.0, 129.1, 129.0, 128.4, 128.0, 126.4, 123.3, 120.9, 120.8, 117.5, 112.0, 99.2, 72.3, 56.2, 21.7.

**HRMS (ESI)**  $m/z$  calculated for  $C_{30}H_{23}ClN_2O_3S+Na^+$ : 549.1010( $^{35}Cl$ ), 550.1044 ( $^{37}Cl$ ), found: 549.1014, 550.1039.

**(2-phenyl-1-tosyl-1,2,3,8-tetrahydropyrrolo[2,3-b]indol-3-yl)(thiophen-2-yl)methanone 9e**

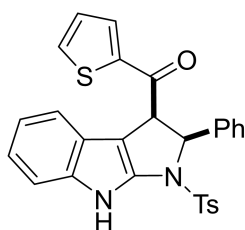

Prepared according to the general procedure to afford **9e** (17.9 mg) in 36% yield as yellow solid, m.p. = 197 – 201 °C. The diastereomeric ratio was determined to be >20:1 by crude

<sup>1</sup>H-NMR analysis.

*NMR and HRMS data for the product 9e:*

**<sup>1</sup>H NMR (600 MHz, CDCl<sub>3</sub>)** δ (ppm): 8.87 (s, 1H), 7.80 (s, 1H), 7.70 (d, *J* = 4.2 Hz, 1H), 7.64 (d, *J* = 7.8 Hz, 2H), 7.41 – 7.35 (m, 5H), 7.34 – 7.27 (m, 3H), 7.18 – 7.14 (m, 1H), 7.09 (t, *J* = 7.2 Hz, 1H), 6.95 (t, *J* = 7.2 Hz, 1H), 6.86 (d, *J* = 7.8 Hz, 1H), 5.76 (d, *J* = 4.2 Hz, 1H), 4.82 (d, *J* = 4.8 Hz, 1H), 2.43 (s, 3H).

**<sup>13</sup>C NMR (150 MHz, CDCl<sub>3</sub>)** δ (ppm): 188.6, 145.0, 142.9, 141.7, 140.9, 137.8, 135.0, 132.9, 131.8, 130.1, 129.9, 128.9, 128.3, 128.2, 128.0, 126.5, 123.4, 120.9, 117.5, 112.0, 99.7, 72.9, 57.2, 21.7.

**HRMS (ESI)** *m/z* calculated for C<sub>28</sub>H<sub>22</sub>N<sub>2</sub>O<sub>3</sub>S<sub>2</sub>+H<sup>+</sup>: 499.1145, found: 499.1153.

### 5.2 General procedure for the oxidation/rearrangement of **9**

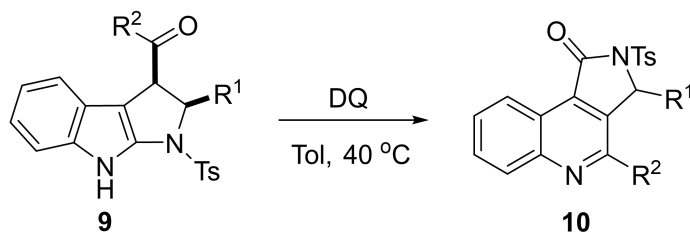

The product **9** (0.1 mmol) was dissolved in toluene (1.0 mL). To this solution was added DQ (0.2 mmol). Then the reaction was stirred for 12 hours at 40 °C. Then the mixture was cooled to room temperature and purified by column chromatography on silica gel (petroleum ether/ dichloromethane/ methanol = 150:150:0.5) to afford **10**, which was dried under vacuum and further analyzed by <sup>1</sup>H NMR, <sup>13</sup>C NMR, HRMS, *etc.*

### 3,4-diphenyl-2-tosyl-2,3-dihydro-1H-pyrrolo[3,4-c]quinolin-1-one 10a

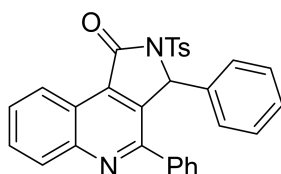

The reaction provided 26.0 mg of **10a** in 53% yield as yellow solid, m.p. = 248 – 251 °C.

*NMR and HRMS data for the product 10a:*

**<sup>1</sup>H NMR (600 MHz, CDCl<sub>3</sub>)** δ (ppm): 9.05 (d, *J* = 8.4 Hz, 1H), 8.23 (d, *J* = 8.4 Hz, 1H), 7.85 (t, *J* = 8.4 Hz, 1H), 7.75 (t, *J* = 7.2 Hz, 1H), 7.38 – 7.32 (m, 7H), 7.10 – 7.05 (m, 3H), 6.94 –

6.90 (m, 2H), 6.60 – 6.57 (m, 3H), 2.32 (s, 3H).

<sup>13</sup>C NMR (150 MHz, CDCl<sub>3</sub>) δ (ppm): 165.9, 155.7, 148.3, 144.9, 138.8, 137.8, 135.3, 133.5, 131.9, 130.8, 129.9, 129.2, 129.1, 128.5, 128.5, 128.3, 128.2, 128.0, 128.0, 123.5, 121.8, 64.5, 21.6.

HRMS (ESI) m/z calculated for C<sub>30</sub>H<sub>22</sub>N<sub>2</sub>O<sub>3</sub>S+Na<sup>+</sup>: 513.1243, found: 513.1244.

### 3-(4-chlorophenyl)-4-phenyl-2-tosyl-2,3-dihydro-1H-pyrrolo[3,4-c]quinolin-1-one 10b

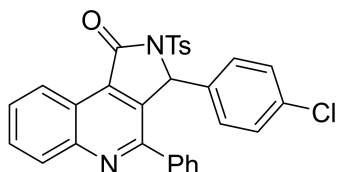

The reaction provided 24.7 mg of **10b** in 47% yield as yellow solid, m.p. = 192 – 195 °C.

*NMR and HRMS data for the product 10b:*

<sup>1</sup>H NMR (600 MHz, CDCl<sub>3</sub>) δ (ppm): 9.03 (d, *J* = 7.8 Hz, 1H), 8.24 (d, *J* = 8.4 Hz, 1H), 7.86 (t, *J* = 7.2 Hz, 1H), 7.76 (t, *J* = 6.6 Hz, 1H), 7.43 – 7.35 (m, 7H), 7.12 (d, *J* = 8.4 Hz, 2H), 6.89 (d, *J* = 9.0 Hz, 2H), 6.57 (s, 1H), 6.52 (d, *J* = 8.4 Hz, 2H), 2.36 (s, 3H).

<sup>13</sup>C NMR (150 MHz, CDCl<sub>3</sub>) δ (ppm): 165.8, 155.5, 148.4, 145.2, 138.3, 137.7, 135.3, 134.3, 132.3, 131.8, 131.0, 129.9, 129.7, 129.4, 129.3, 129.2, 128.6, 128.2, 128.1, 127.9, 123.5, 121.8, 63.7, 21.6.

HRMS (ESI) m/z calculated for C<sub>30</sub>H<sub>21</sub>ClN<sub>2</sub>O<sub>3</sub>S+Na<sup>+</sup>: 547.0854(<sup>35</sup>Cl), 548.0887 (<sup>37</sup>Cl), found: 547.0853, 548.0885.

### 4-phenyl-3-(p-tolyl)-2-tosyl-2,3-dihydro-1H-pyrrolo[3,4-c]quinolin-1-one 10c

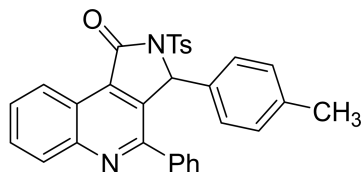

The reaction provided 21.2 mg of **10c** in 42% yield as yellow solid, m.p. = 161 – 165 °C.

*NMR and HRMS data for the product 10c:*

<sup>1</sup>H NMR (600 MHz, CDCl<sub>3</sub>) δ (ppm): 9.05 (d, *J* = 7.8 Hz, 1H), 8.23 (d, *J* = 7.8 Hz, 1H), 7.86 – 7.82 (m, 1H), 7.75 (t, *J* = 7.2 Hz, 1H), 7.39 – 7.32 (m, 7H), 7.07 (d, *J* = 8.4 Hz, 2H), 6.72 (d, *J* = 7.8 Hz, 2H), 6.57 (s, 1H), 6.47 (d, *J* = 7.8 Hz, 2H), 2.34 (s, 3H), 2.21 (s, 3H).

$^{13}\text{C}$  NMR (150 MHz,  $\text{CDCl}_3$ )  $\delta$  (ppm): 166.0, 155.7, 148.3, 144.8, 138.9, 138.2, 137.8, 135.4, 131.8, 130.7, 130.5, 129.9, 129.2, 129.1, 129.0, 128.7, 128.4, 128.4, 128.2, 128.1, 123.5, 121.9, 64.4, 21.6, 21.1.

HRMS (ESI)  $m/z$  calculated for  $\text{C}_{31}\text{H}_{24}\text{N}_2\text{O}_3\text{S}+\text{Na}^+$ : 527.1400, found: 527.1400.

**4-(4-chlorophenyl)-3-phenyl-2-tosyl-2,3-dihydro-1H-pyrrolo[3,4-c]quinolin-1-one 10d**

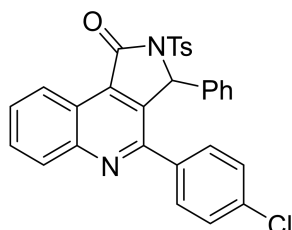

The reaction provided 23.6 mg of **10d** in 45% yield as yellow solid, m.p. = 224 – 226 °C.

*NMR and HRMS data for the product 10d:*

$^1\text{H}$  NMR (600 MHz,  $\text{CDCl}_3$ )  $\delta$  (ppm): 9.05 (dd,  $J = 8.4, 1.2$  Hz, 1H), 8.22 (d,  $J = 8.4$  Hz, 1H), 7.88 – 7.84 (m, 1H), 7.77 (t,  $J = 7.2$  Hz, 1H), 7.34 – 7.30 (m, 6H), 7.13 (t,  $J = 7.2$  Hz, 1H), 7.06 (d,  $J = 7.8$  Hz, 2H), 6.99 – 6.95 (m, 2H), 6.63 (d,  $J = 7.2$  Hz, 2H), 6.56 (s, 1H), 2.33 (s, 3H).

$^{13}\text{C}$  NMR (150 MHz,  $\text{CDCl}_3$ )  $\delta$  (ppm): 165.7, 154.3, 148.3, 145.0, 138.5, 136.2, 135.5, 135.3, 133.4, 132.2, 131.0, 129.8, 129.6, 129.4, 129.2, 128.7, 128.6, 128.2, 128.0, 123.6, 121.9, 64.4, 21.6.

HRMS (ESI)  $m/z$  calculated for  $\text{C}_{30}\text{H}_{21}\text{ClN}_2\text{O}_3\text{S}+\text{Na}^+$ : 547.0854( $^{35}\text{Cl}$ ), 548.0887 ( $^{37}\text{Cl}$ ), found: 547.0851, 548.0877.

**3-phenyl-4-(thiophen-2-yl)-2-tosyl-2,3-dihydro-1H-pyrrolo[3,4-c]quinolin-1-one 10e**

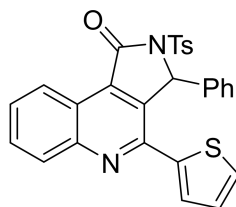

The reaction provided 23.8 mg of **10e** in 48% yield as yellow solid, m.p. = 243 – 245 °C.

*NMR and HRMS data for the product 10e:*

$^1\text{H}$  NMR (600 MHz,  $\text{CDCl}_3$ )  $\delta$  (ppm): 9.02 (d,  $J = 8.4$  Hz, 1H), 8.18 (d,  $J = 7.8$  Hz, 1H), 7.85 – 7.81 (m, 1H), 7.72 – 7.69 (m, 1H), 7.47 (d,  $J = 2.4$  Hz, 1H), 7.39 (dd,  $J = 5.4, 1.2$  Hz, 1H), 7.30 (d,  $J = 8.4$  Hz, 2H), 7.24 – 7.20 (m, 1H), 7.13 – 7.10 (m, 2H), 7.06 – 7.02 (m, 3H), 6.98 (d,



$J = 7.8$  Hz, 2H), 6.75 (s, 1H), 2.32 (s, 3H).

$^{13}\text{C}$  NMR (150 MHz,  $\text{CDCl}_3$ )  $\delta$  (ppm): 165.6, 148.2, 144.9, 141.3, 136.6, 135.3, 133.6, 132.8, 131.0, 129.5, 129.4, 129.3, 129.2, 129.0, 128.9, 128.4, 127.9, 127.7, 123.5, 121.6, 64.6, 21.6.

HRMS (ESI)  $m/z$  calculated for  $\text{C}_{28}\text{H}_{20}\text{N}_2\text{O}_3\text{S}_2 + \text{Na}^+$ : 519.0808, found: 519.0802.

### 5.3 Proposed reaction mechanism

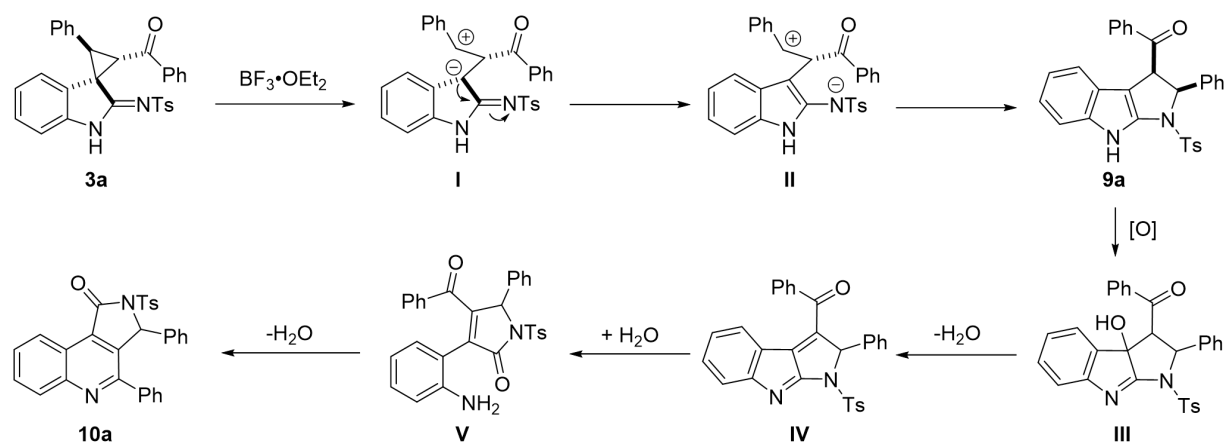

**Figure S1.** Proposed mechanism.

## 6. Crystal Data and Structure Refinement

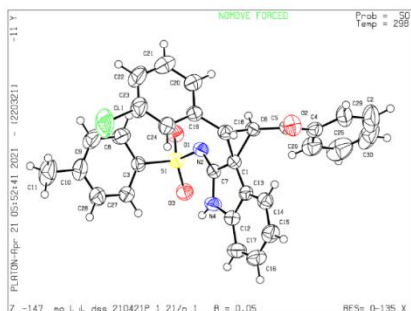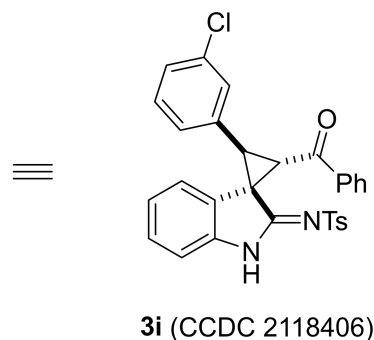

|                                             |                                                                   |
|---------------------------------------------|-------------------------------------------------------------------|
| Identification code                         | <b>3i</b>                                                         |
| Empirical formula                           | C <sub>30</sub> H <sub>23</sub> ClN <sub>2</sub> O <sub>3</sub> S |
| Formula weight                              | 527.01                                                            |
| Temperature/K                               | 298.0                                                             |
| Crystal system                              | monoclinic                                                        |
| Space group                                 | P2 <sub>1</sub> /n                                                |
| a/Å                                         | 12.9731(6)                                                        |
| b/Å                                         | 15.1155(6)                                                        |
| c/Å                                         | 13.3582(6)                                                        |
| α/°                                         | 90                                                                |
| β/°                                         | 94.384(2)                                                         |
| γ/°                                         | 90                                                                |
| Volume/Å <sup>3</sup>                       | 2611.8(2)                                                         |
| Z                                           | 4                                                                 |
| ρ <sub>calc</sub> /cm <sup>3</sup>          | 1.340                                                             |
| μ/mm <sup>-1</sup>                          | 0.261                                                             |
| F(000)                                      | 1096.0                                                            |
| Crystal size/mm <sup>3</sup>                | 0.35 × 0.18 × 0.11                                                |
| Radiation                                   | MoKα (λ = 0.71073)                                                |
| 2θ range for data collection/°              | 4.076 to 55.09                                                    |
| Index ranges                                | -16 ≤ h ≤ 16, -18 ≤ k ≤ 19, -17 ≤ l ≤ 17                          |
| Reflections collected                       | 57430                                                             |
| Independent reflections                     | 6009 [R <sub>int</sub> = 0.1401, R <sub>sigma</sub> = 0.0652]     |
| Data/restraints/parameters                  | 6009/0/335                                                        |
| Goodness-of-fit on F <sup>2</sup>           | 1.013                                                             |
| Final R indexes [I ≥ 2σ (I)]                | R <sub>1</sub> = 0.0518, wR <sub>2</sub> = 0.1069                 |
| Final R indexes [all data]                  | R <sub>1</sub> = 0.1145, wR <sub>2</sub> = 0.1301                 |
| Largest diff. peak/hole / e Å <sup>-3</sup> | 0.20/-0.36                                                        |

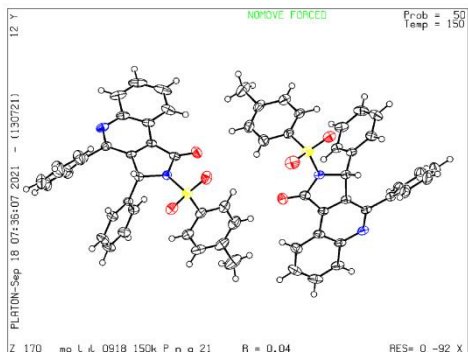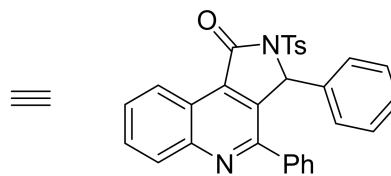

**10a** (CCDC 2118408)

|                                             |                                                                 |
|---------------------------------------------|-----------------------------------------------------------------|
| Identification code                         | <b>10a</b>                                                      |
| Empirical formula                           | C <sub>30</sub> H <sub>22</sub> N <sub>2</sub> O <sub>3</sub> S |
| Formula weight                              | 490.55                                                          |
| Temperature/K                               | 150.0                                                           |
| Crystal system                              | orthorhombic                                                    |
| Space group                                 | Pna2 <sub>1</sub>                                               |
| a/Å                                         | 21.023(3)                                                       |
| b/Å                                         | 12.4076(16)                                                     |
| c/Å                                         | 18.781(3)                                                       |
| α/°                                         | 90                                                              |
| β/°                                         | 90                                                              |
| γ/°                                         | 90                                                              |
| Volume/Å <sup>3</sup>                       | 4899.0(13)                                                      |
| Z                                           | 8                                                               |
| ρ <sub>calc</sub> /cm <sup>3</sup>          | 1.330                                                           |
| μ/mm <sup>-1</sup>                          | 0.168                                                           |
| F(000)                                      | 2048.0                                                          |
| Crystal size/mm <sup>3</sup>                | 0.32 × 0.18 × 0.16                                              |
| Radiation                                   | MoKα (λ = 0.71073)                                              |
| 2θ range for data collection/°              | 3.812 to 55.114                                                 |
| Index ranges                                | -23 ≤ h ≤ 27, -16 ≤ k ≤ 14, -24 ≤ l ≤ 21                        |
| Reflections collected                       | 43968                                                           |
| Independent reflections                     | 10630 [R <sub>int</sub> = 0.0676, R <sub>sigma</sub> = 0.0586]  |
| Data/restraints/parameters                  | 10630/1/651                                                     |
| Goodness-of-fit on F <sup>2</sup>           | 1.017                                                           |
| Final R indexes [I ≥ 2σ (I)]                | R <sub>1</sub> = 0.0422, wR <sub>2</sub> = 0.0929               |
| Final R indexes [all data]                  | R <sub>1</sub> = 0.0583, wR <sub>2</sub> = 0.1018               |
| Largest diff. peak/hole / e Å <sup>-3</sup> | 0.19/-0.33                                                      |
| Flack parameter                             | 0.46(4)                                                         |

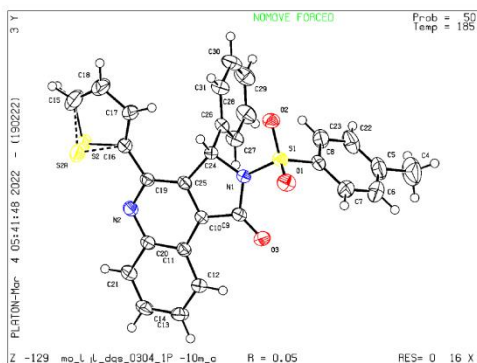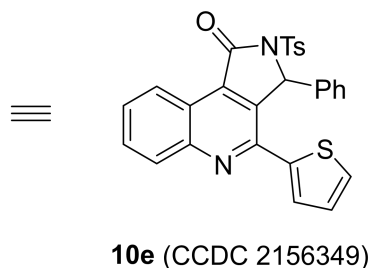

|                                             |                                                                              |
|---------------------------------------------|------------------------------------------------------------------------------|
| Identification code                         | <b>10e</b>                                                                   |
| Empirical formula                           | C <sub>28</sub> H <sub>20</sub> N <sub>2</sub> O <sub>3</sub> S <sub>2</sub> |
| Formula weight                              | 496.58                                                                       |
| Temperature/K                               | 185.0                                                                        |
| Crystal system                              | triclinic                                                                    |
| Space group                                 | P-1                                                                          |
| a/Å                                         | 11.4722(9)                                                                   |
| b/Å                                         | 11.6024(9)                                                                   |
| c/Å                                         | 11.8100(11)                                                                  |
| α/°                                         | 112.336(3)                                                                   |
| β/°                                         | 91.537(3)                                                                    |
| γ/°                                         | 112.501(3)                                                                   |
| Volume/Å <sup>3</sup>                       | 1315.76(19)                                                                  |
| Z                                           | 2                                                                            |
| ρ <sub>calc</sub> /cm <sup>3</sup>          | 1.253                                                                        |
| μ/mm <sup>-1</sup>                          | 0.233                                                                        |
| F(000)                                      | 516.0                                                                        |
| Crystal size/mm <sup>3</sup>                | 0.43 × 0.35 × 0.09                                                           |
| Radiation                                   | MoKα (λ = 0.71073)                                                           |
| 2θ range for data collection/°              | 3.924 to 55.142                                                              |
| Index ranges                                | -14 ≤ h ≤ 14, -14 ≤ k ≤ 14, -15 ≤ l ≤ 15                                     |
| Reflections collected                       | 29591                                                                        |
| Independent reflections                     | 6044 [R <sub>int</sub> = 0.0948, R <sub>sigma</sub> = 0.0721]                |
| Data/restraints/parameters                  | 6044/0/321                                                                   |
| Goodness-of-fit on F <sup>2</sup>           | 1.028                                                                        |
| Final R indexes [I >= 2σ (I)]               | R <sub>1</sub> = 0.0503, wR <sub>2</sub> = 0.1188                            |
| Final R indexes [all data]                  | R <sub>1</sub> = 0.0841, wR <sub>2</sub> = 0.1357                            |
| Largest diff. peak/hole / e Å <sup>-3</sup> | 0.40/-0.47                                                                   |

## 7. References and Notes

- 1 (a) E. Krell, *Handbook of Laboratory Distillation*, Elsevier Publishing Company: Amsterdam-London-New York, 1963; (b) M. J. Rosengart, *The Technique of Distillation and Rectification in the Laboratory*, VEB Verlag Technik: Berlin, 1954; (c) F. Stage, *Angew. Chem.*, 1947, **19**, 175.
- 2 K. Moriyama, K. Ishida, H. Togo, *Chem. Common.*, 2015, **51**, 2273.
- 3 S. K. Chittimalla and C. Bandi, *RSC Adv.*, 2013, **3**, 13663.

# 8. NMR Spectra

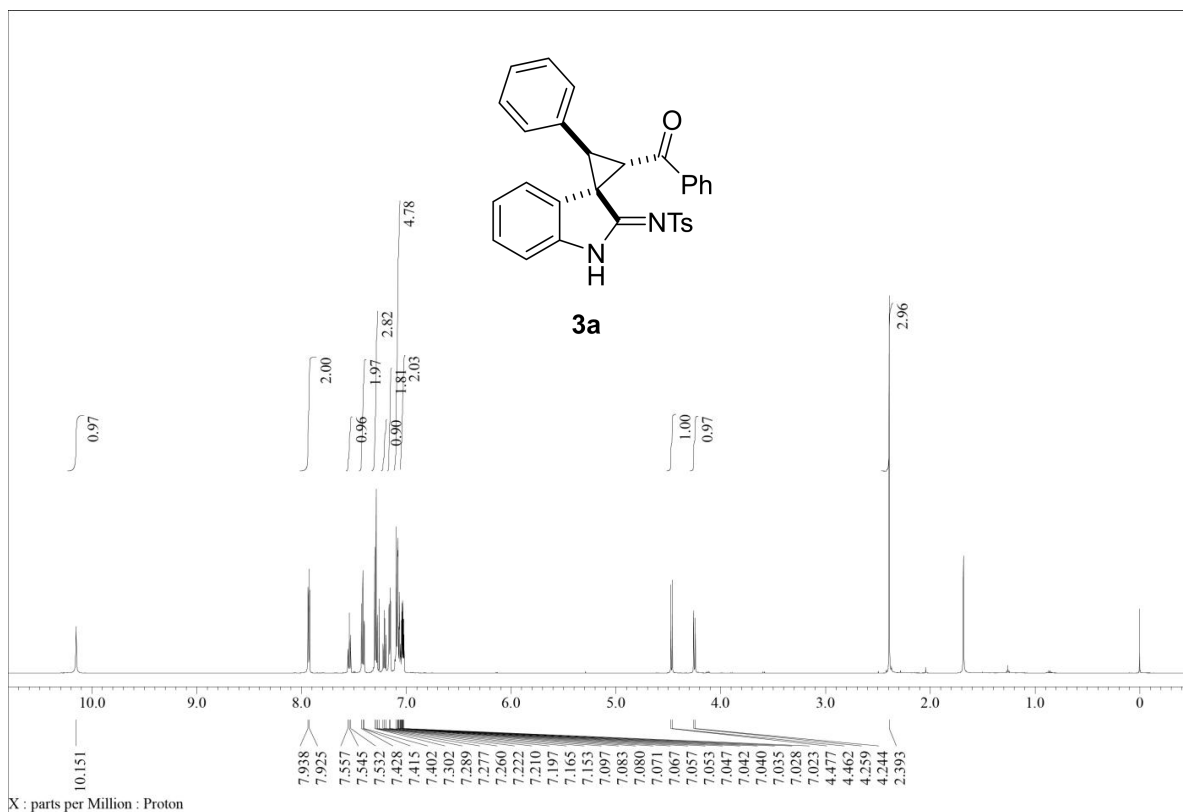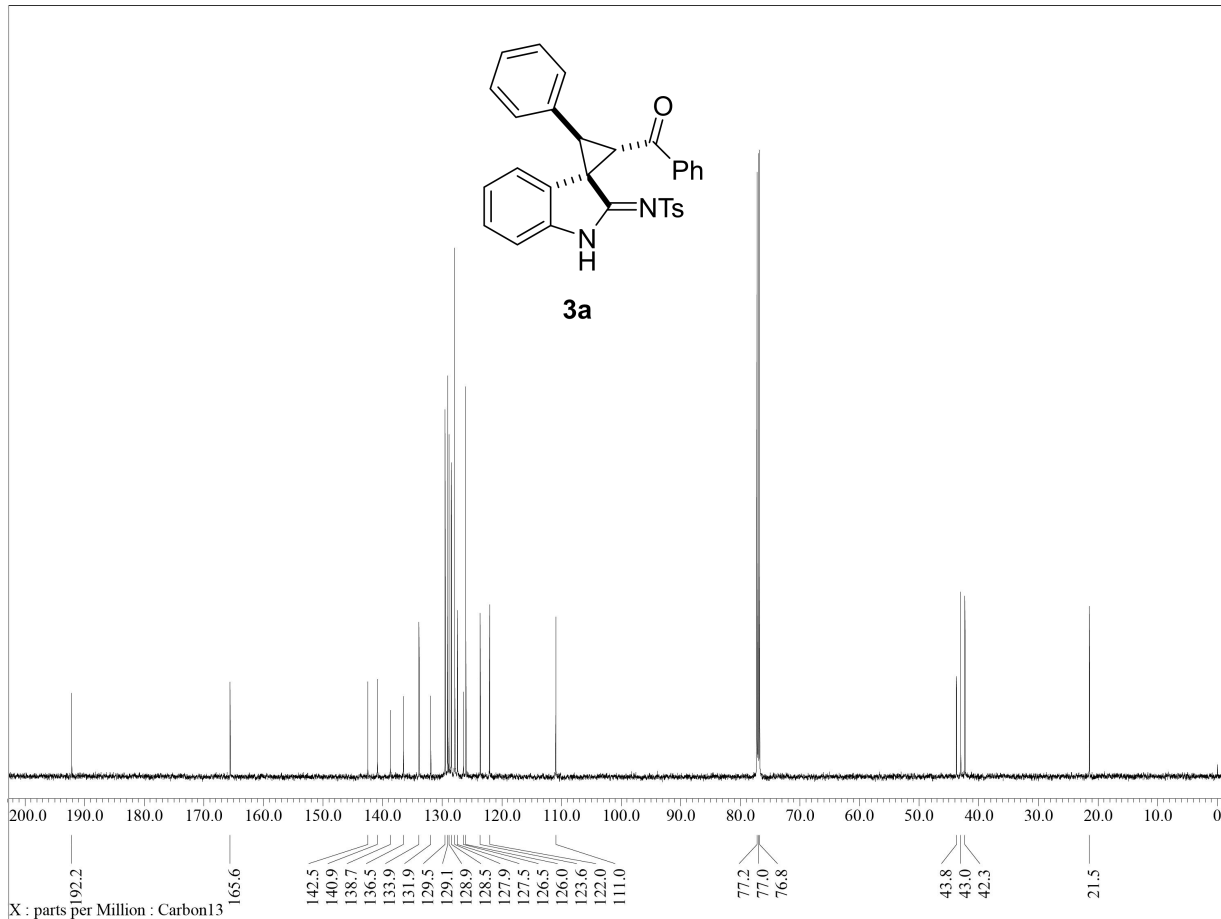

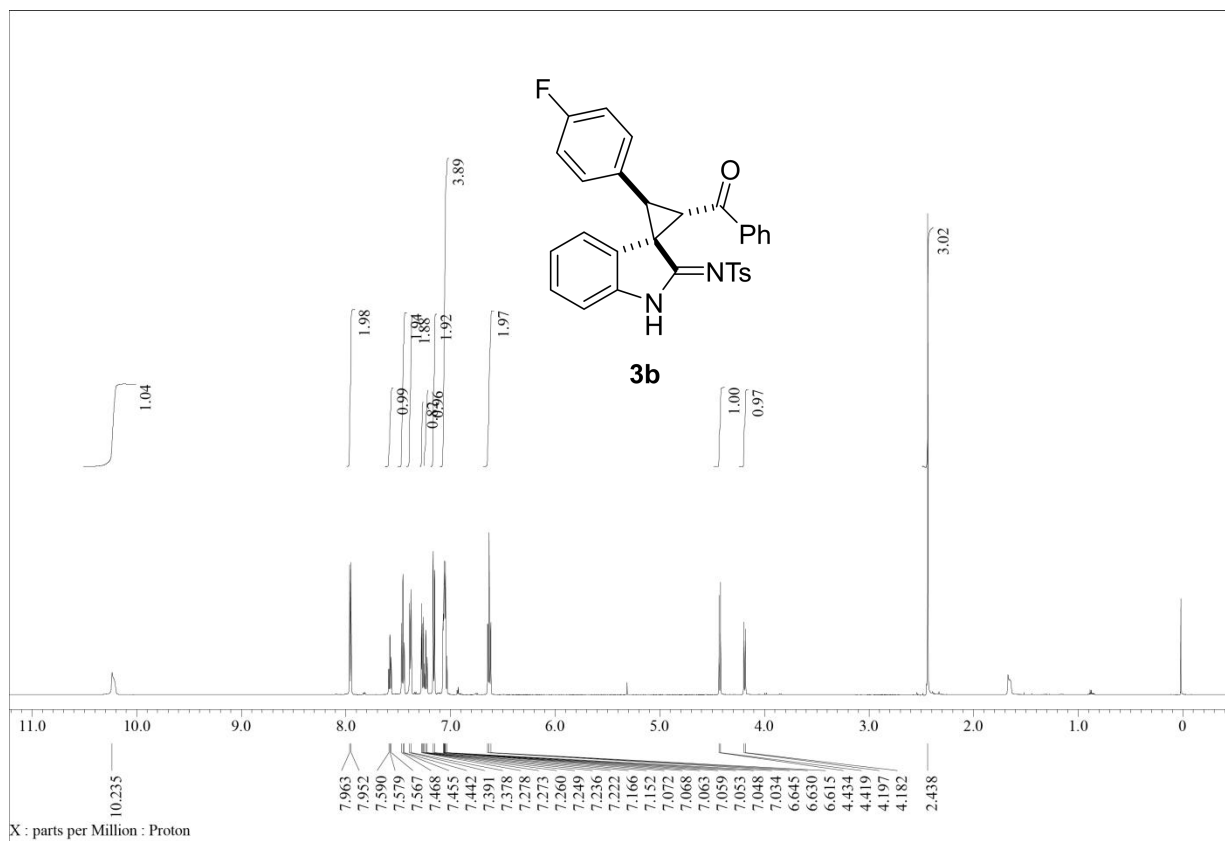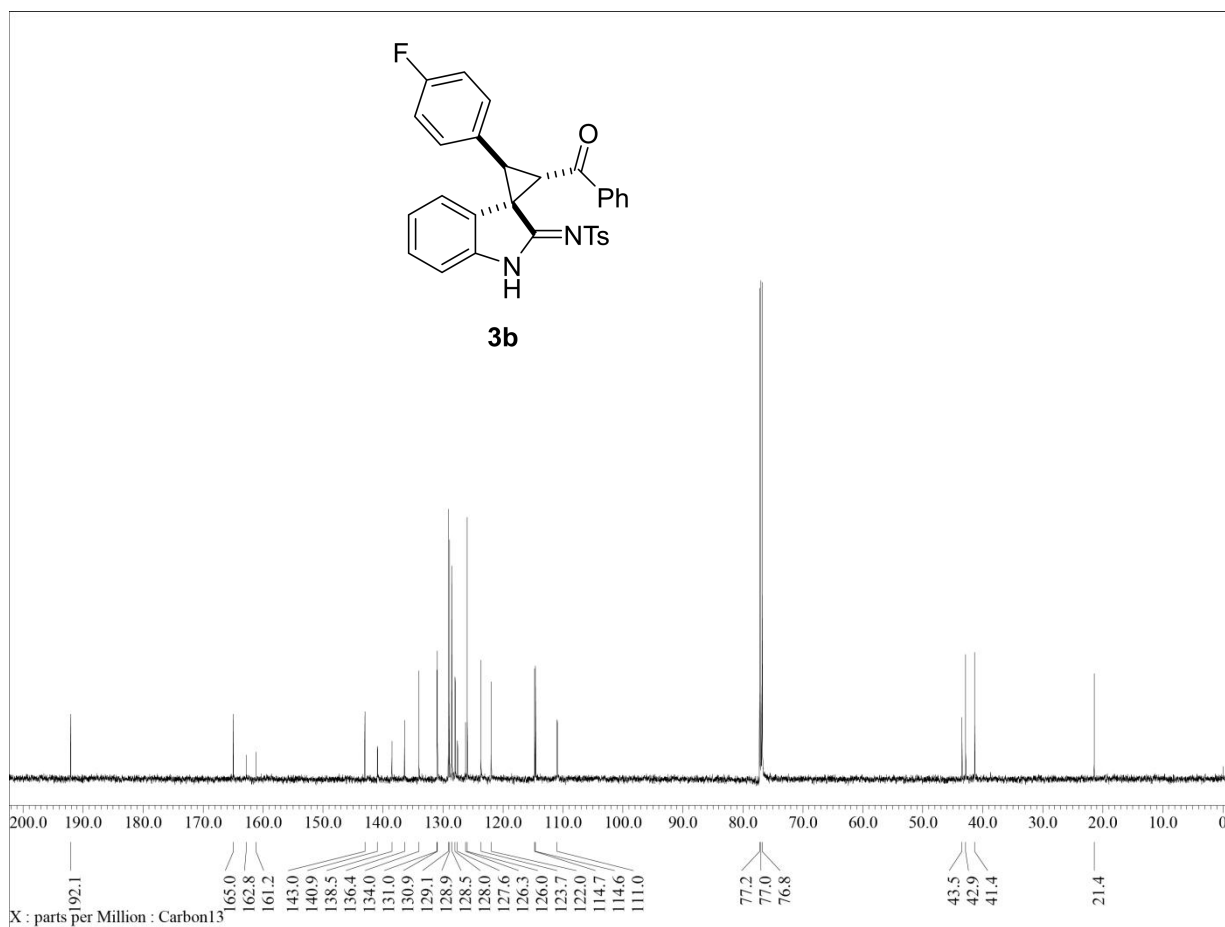

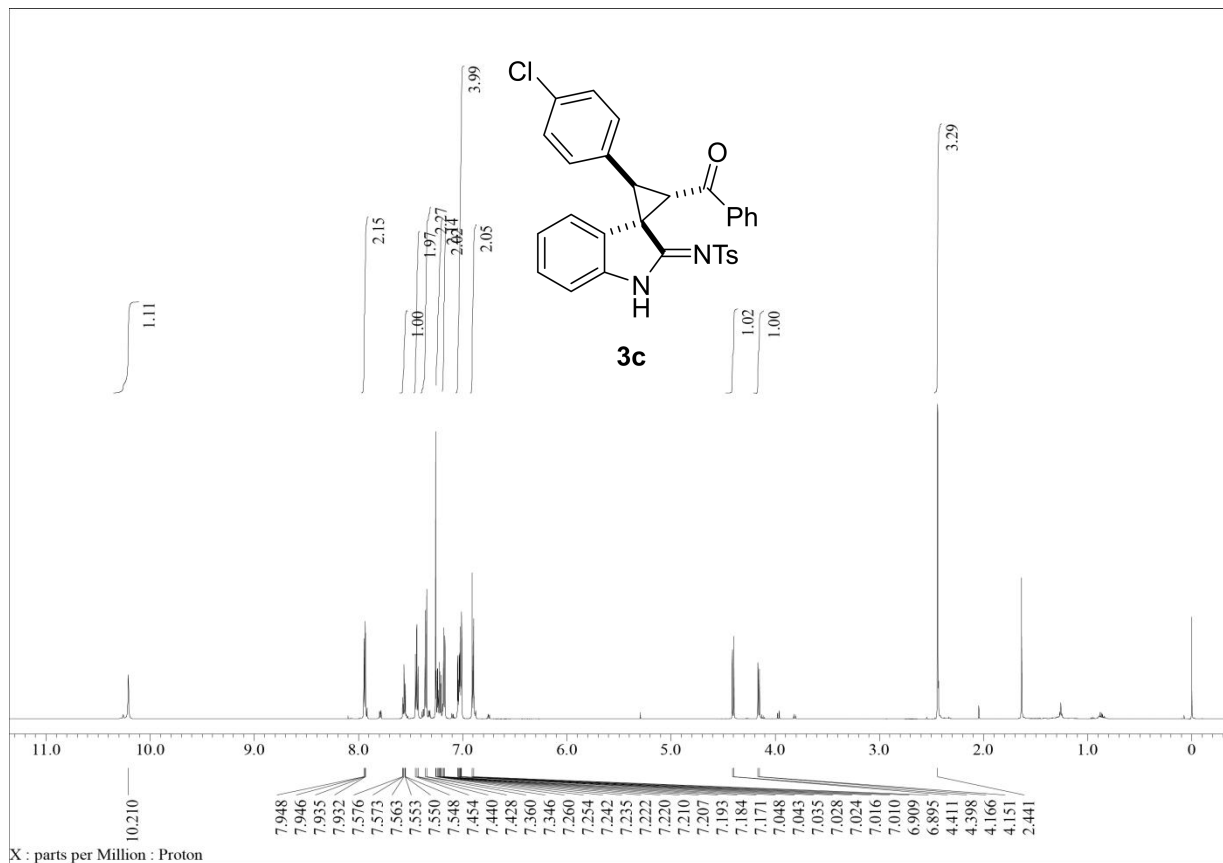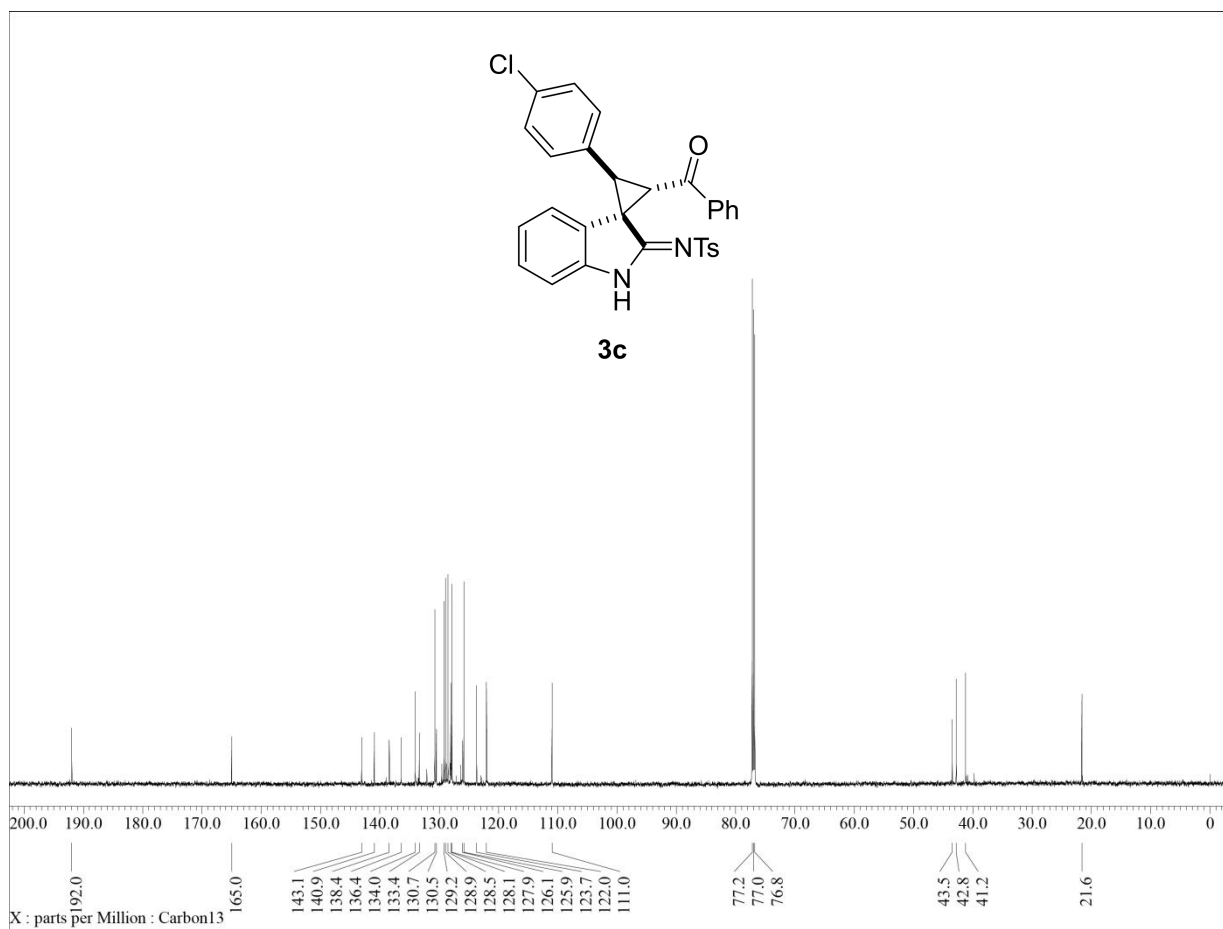



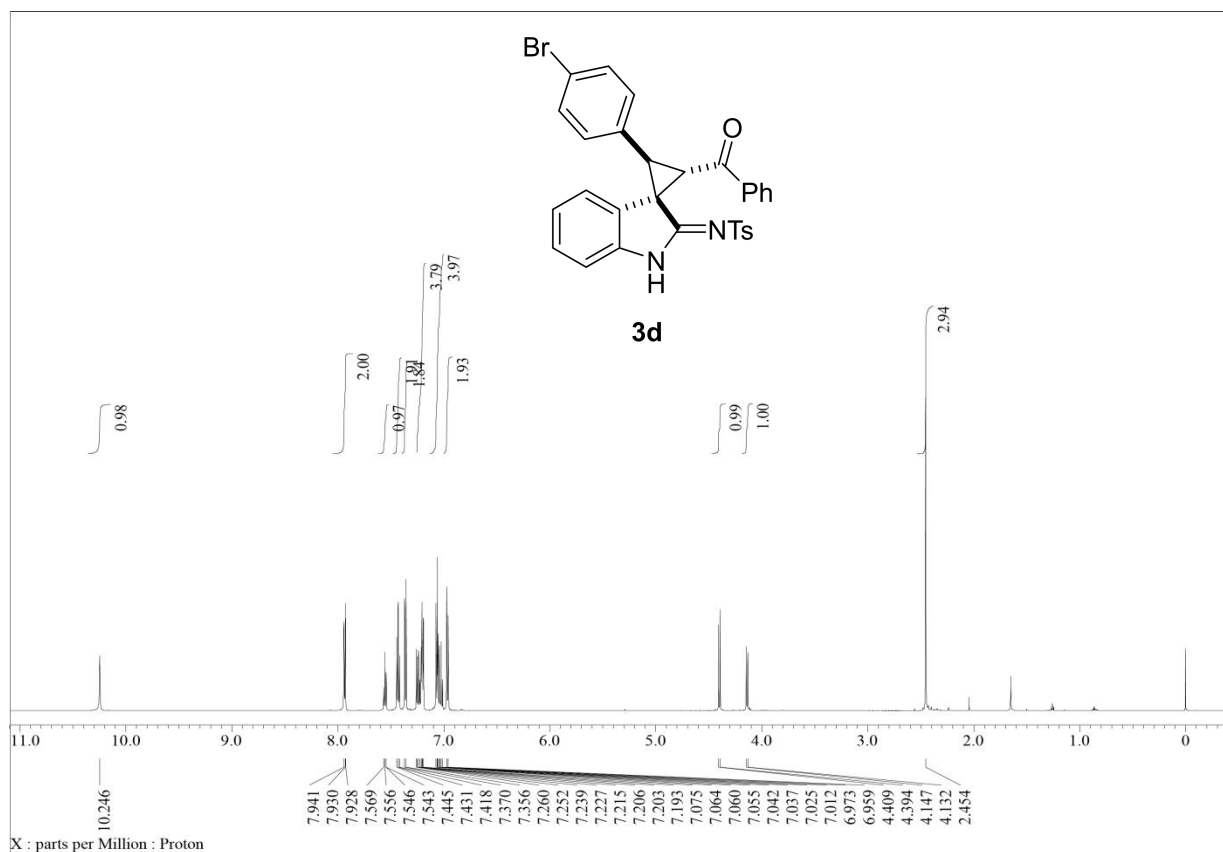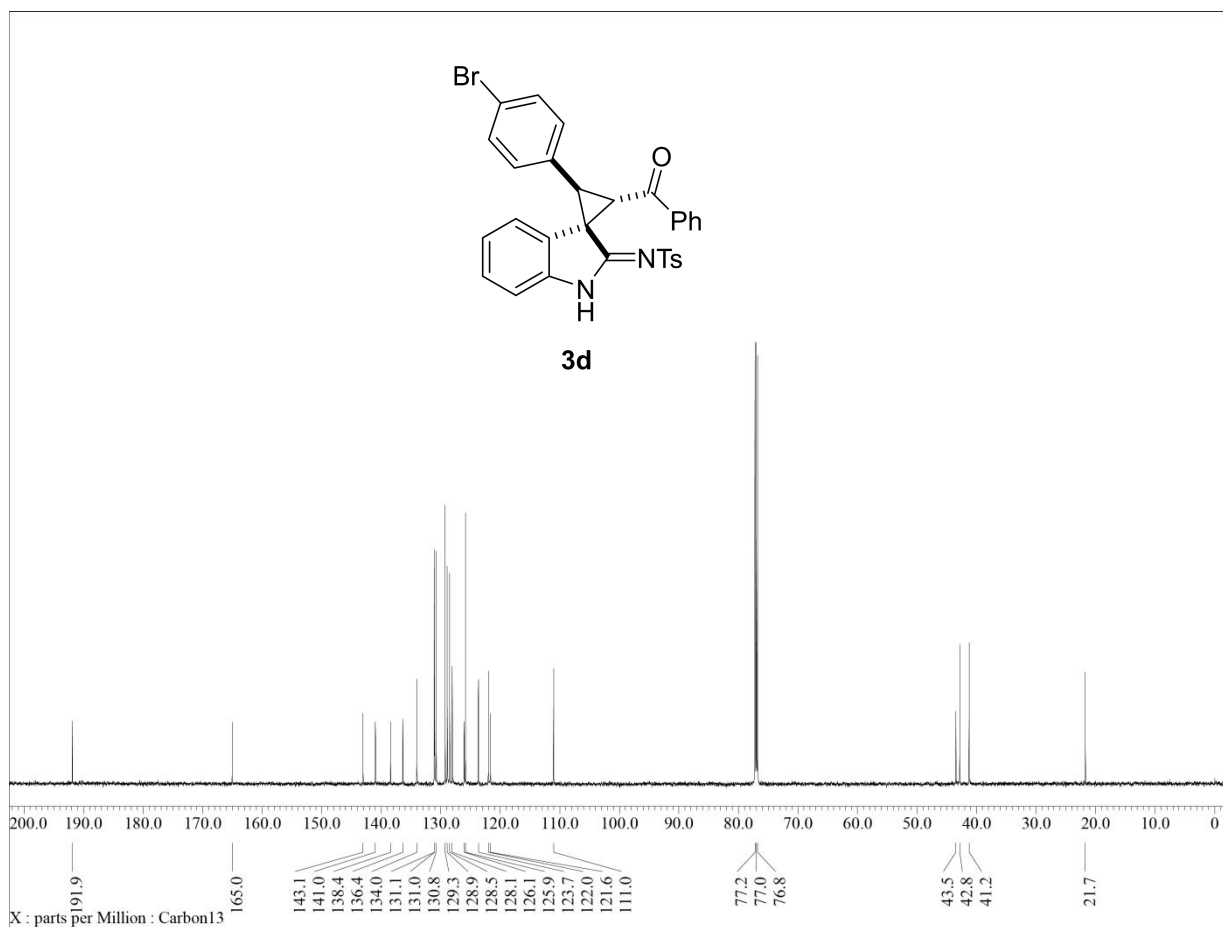

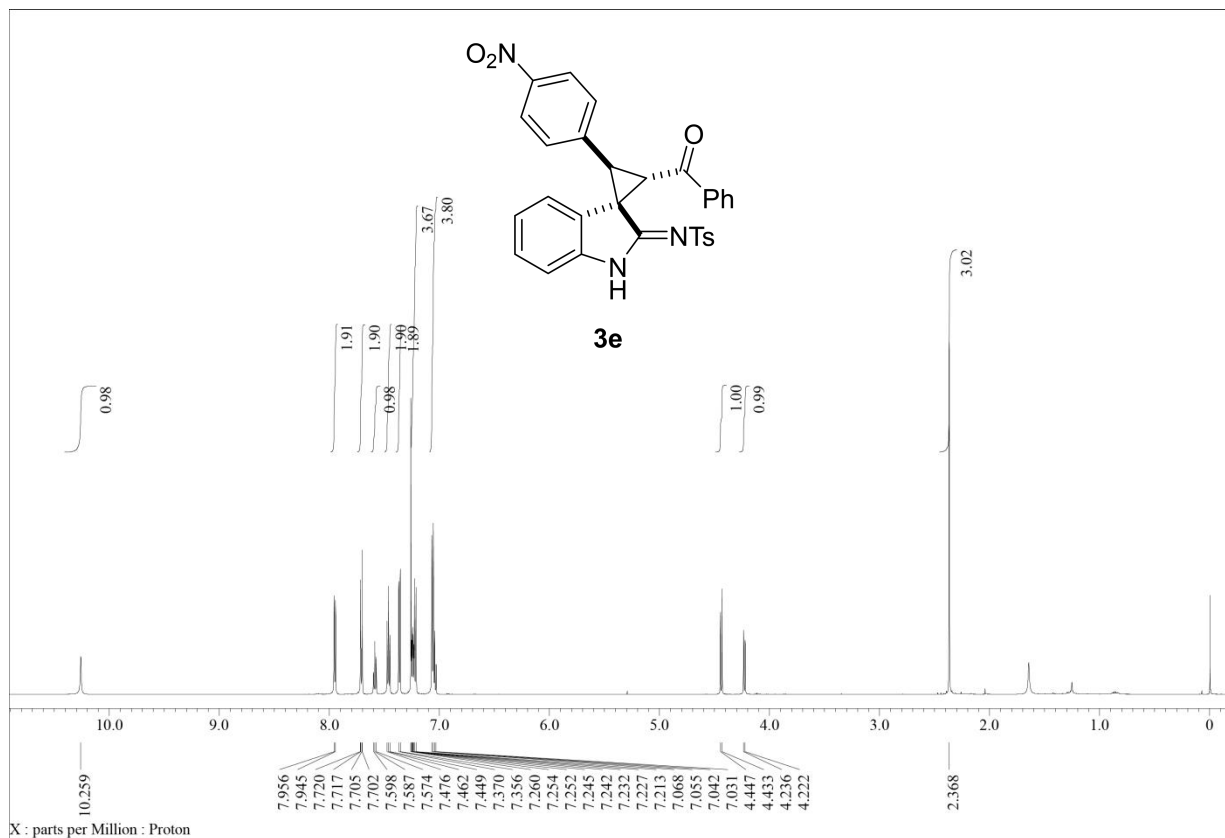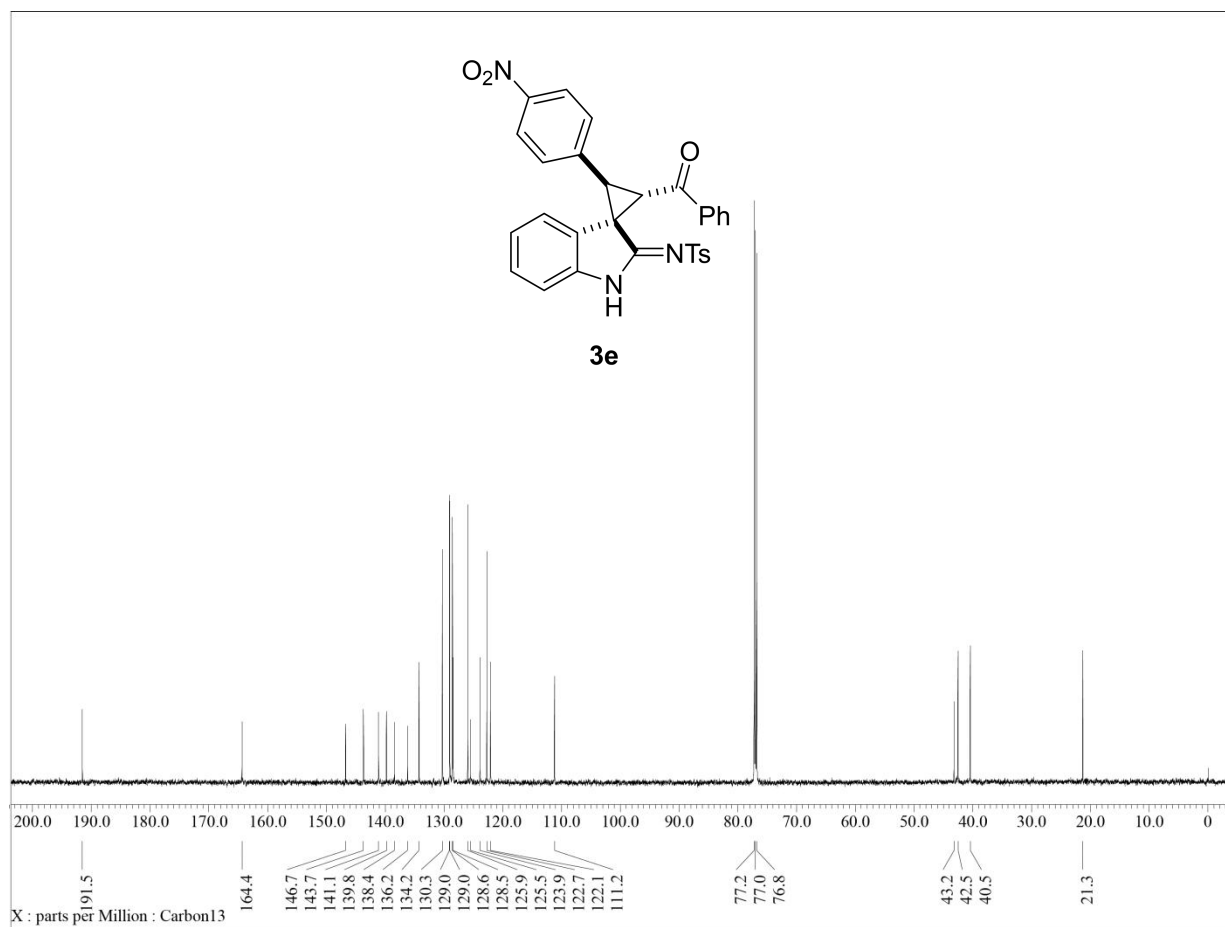

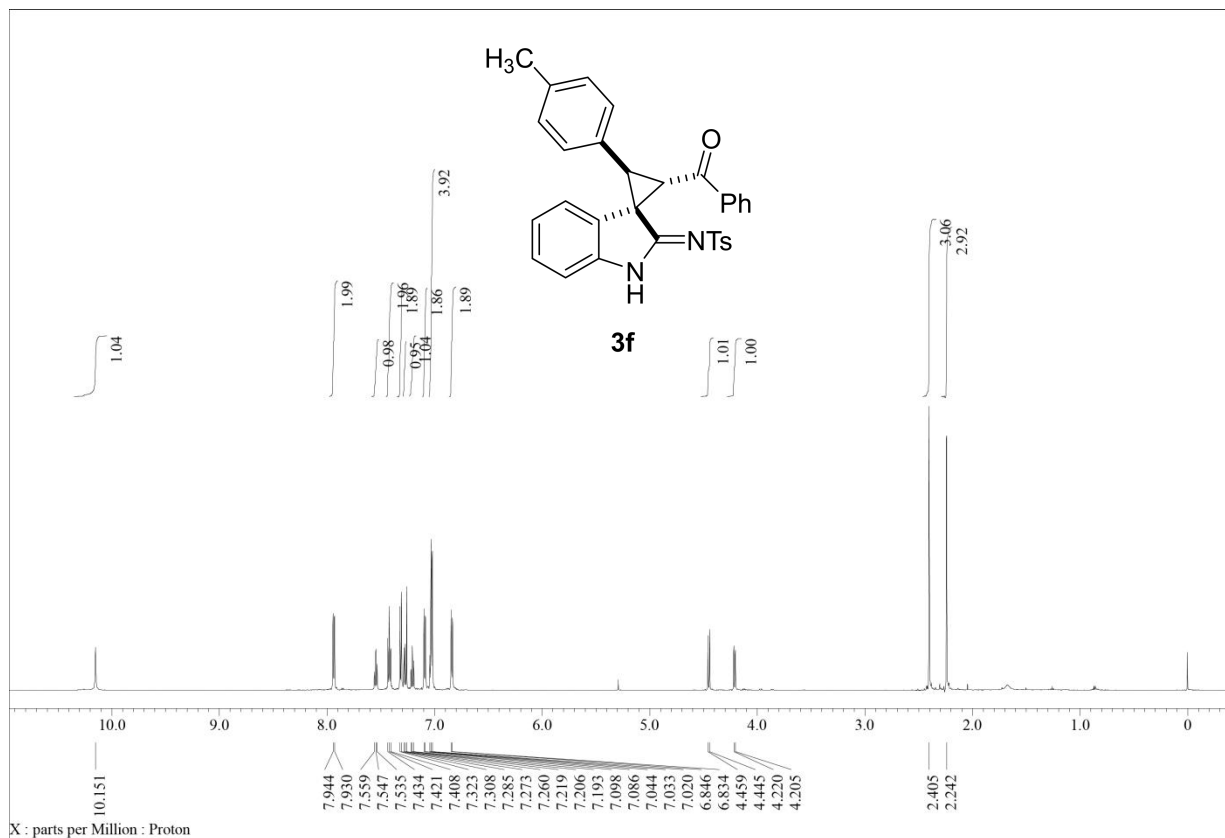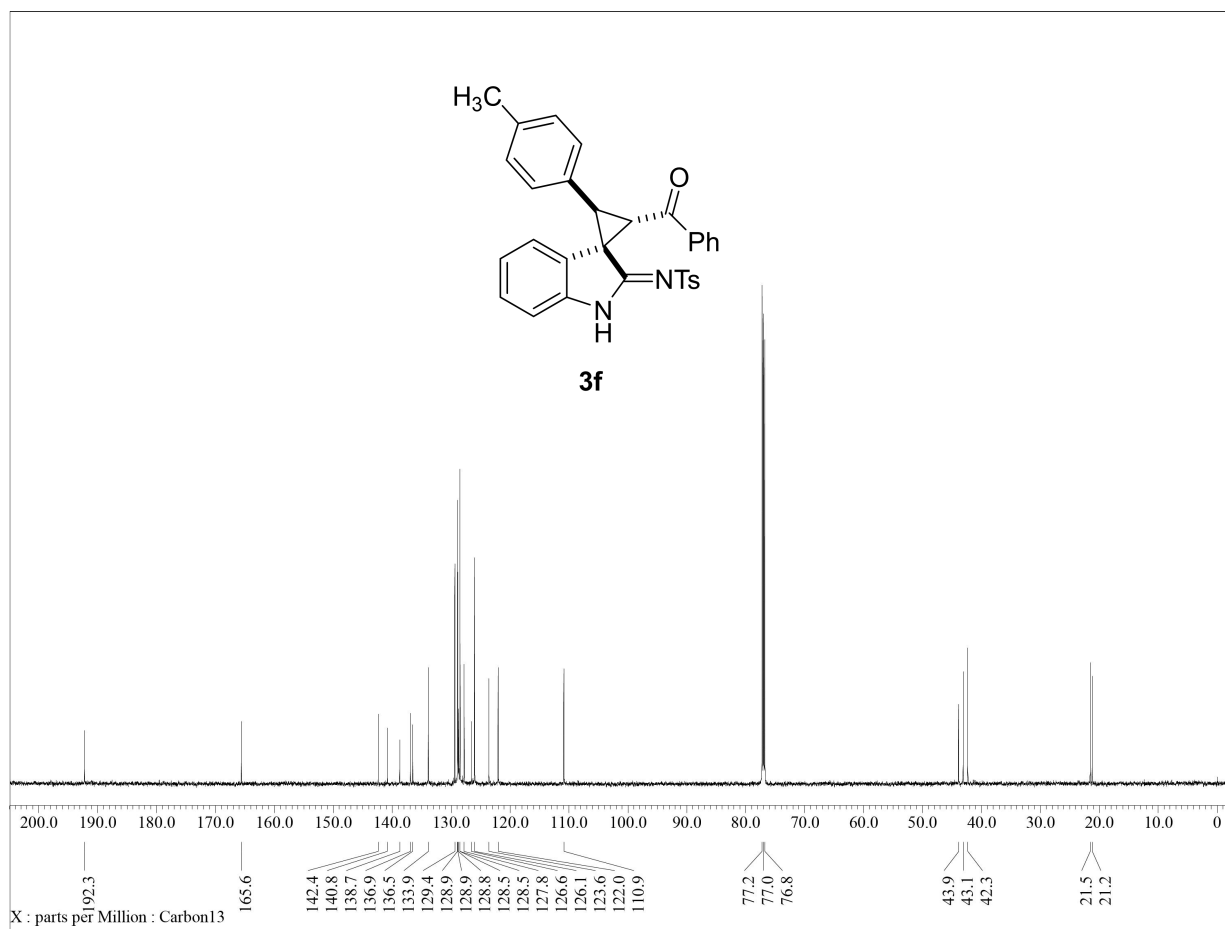

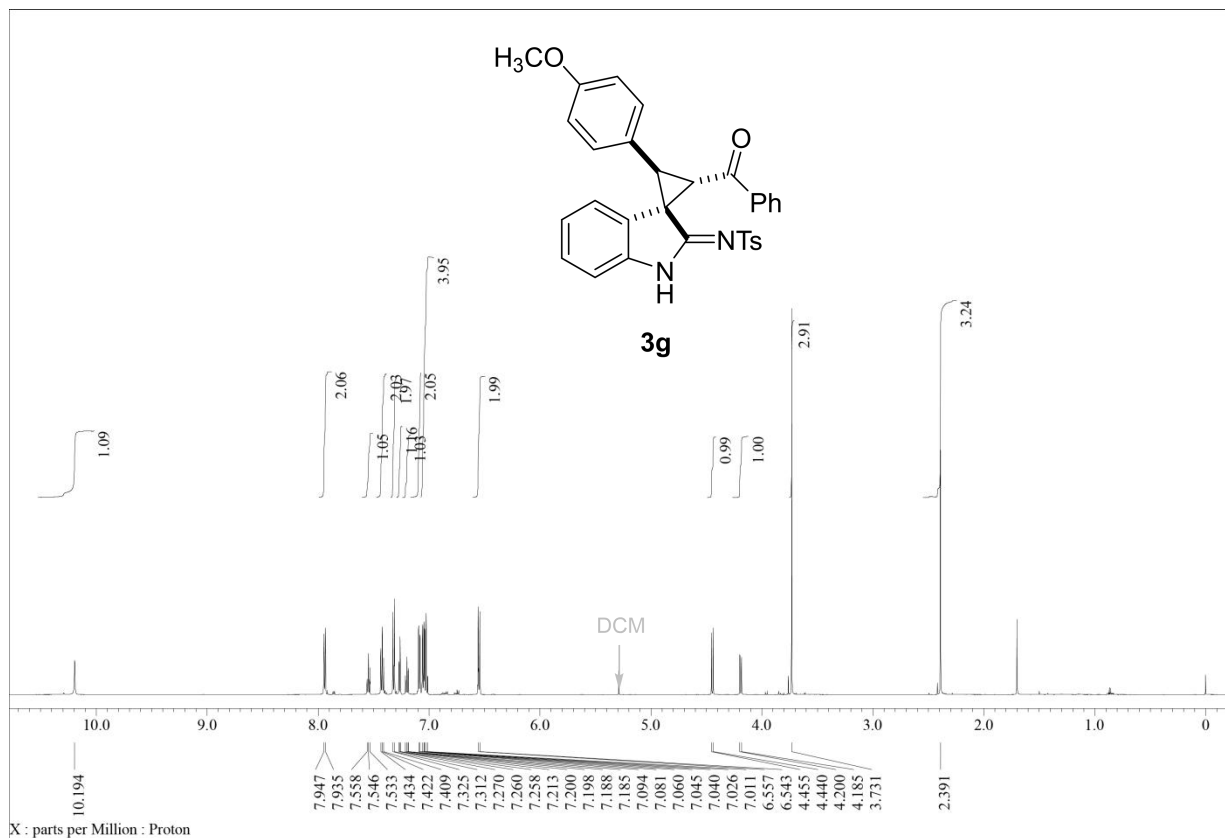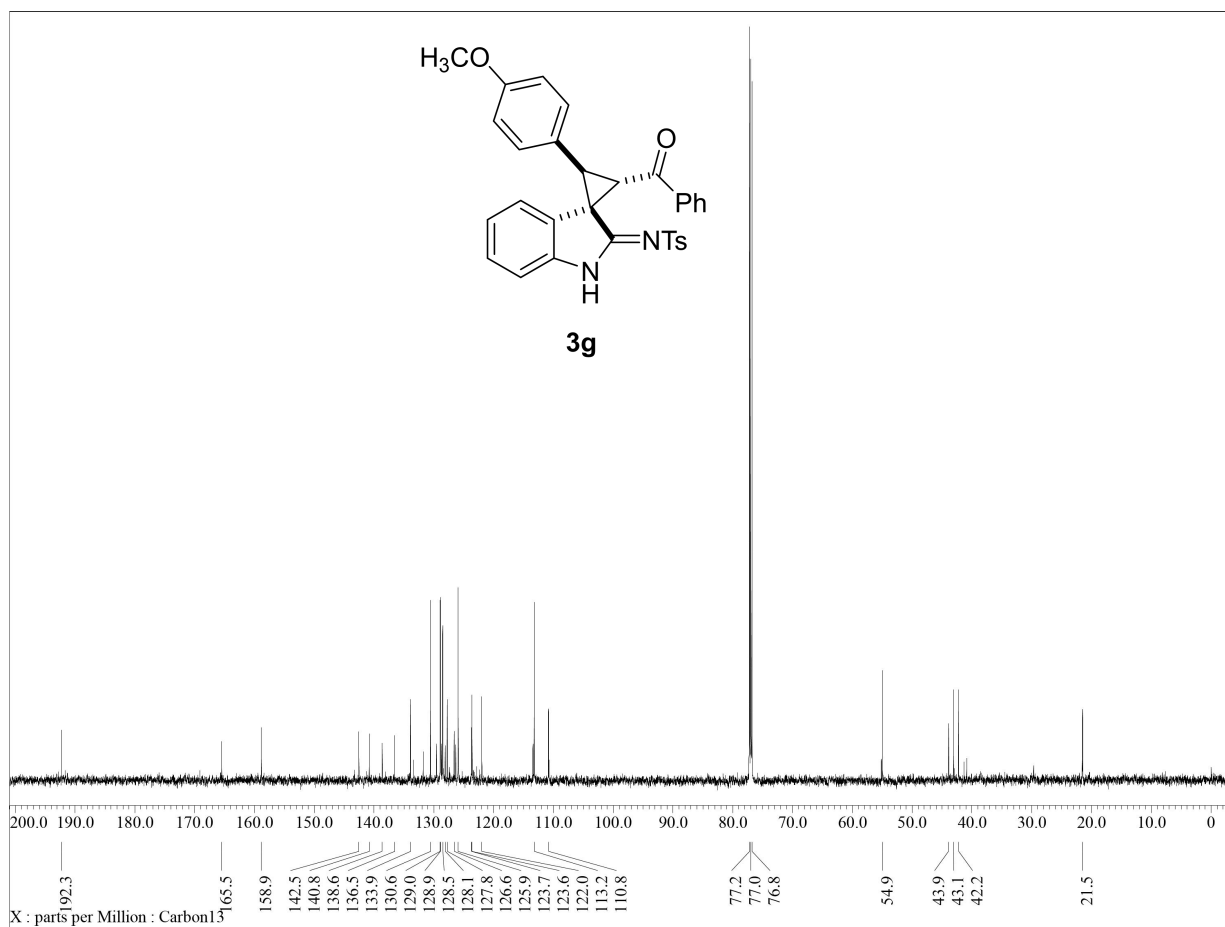

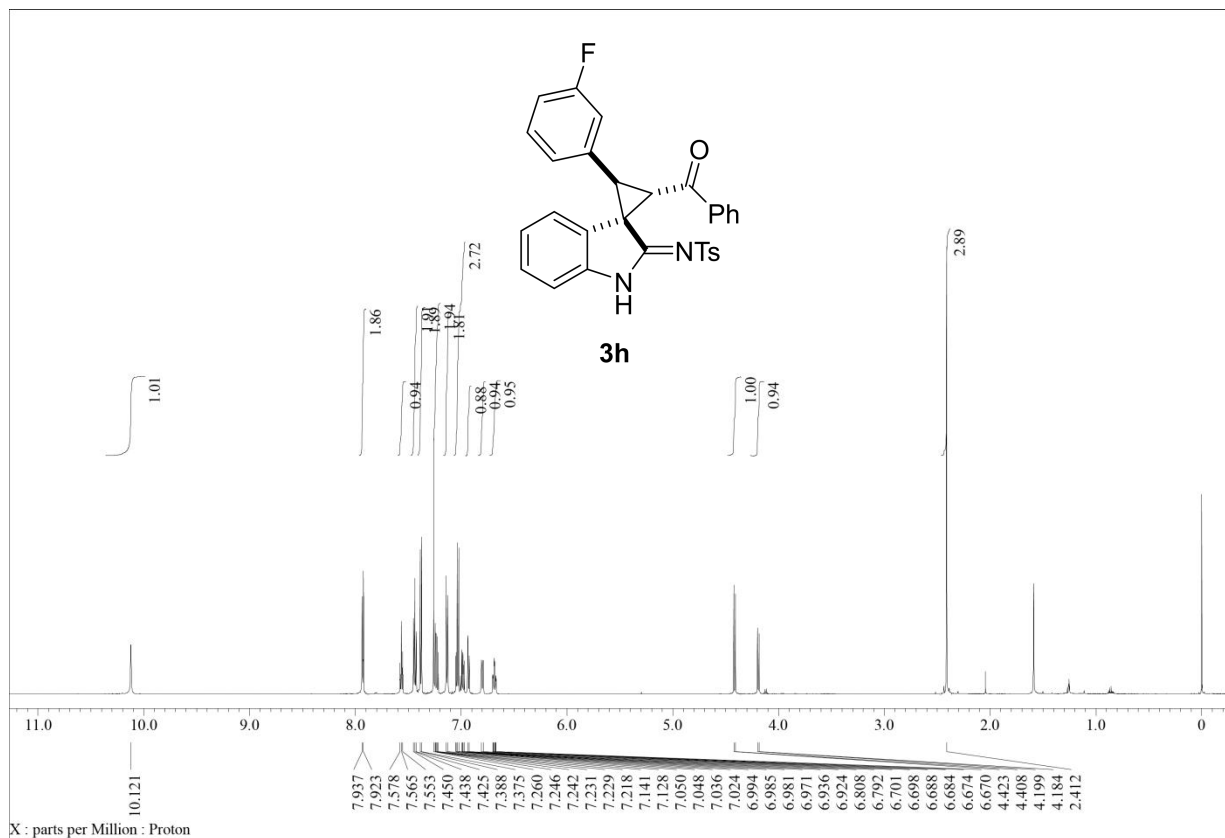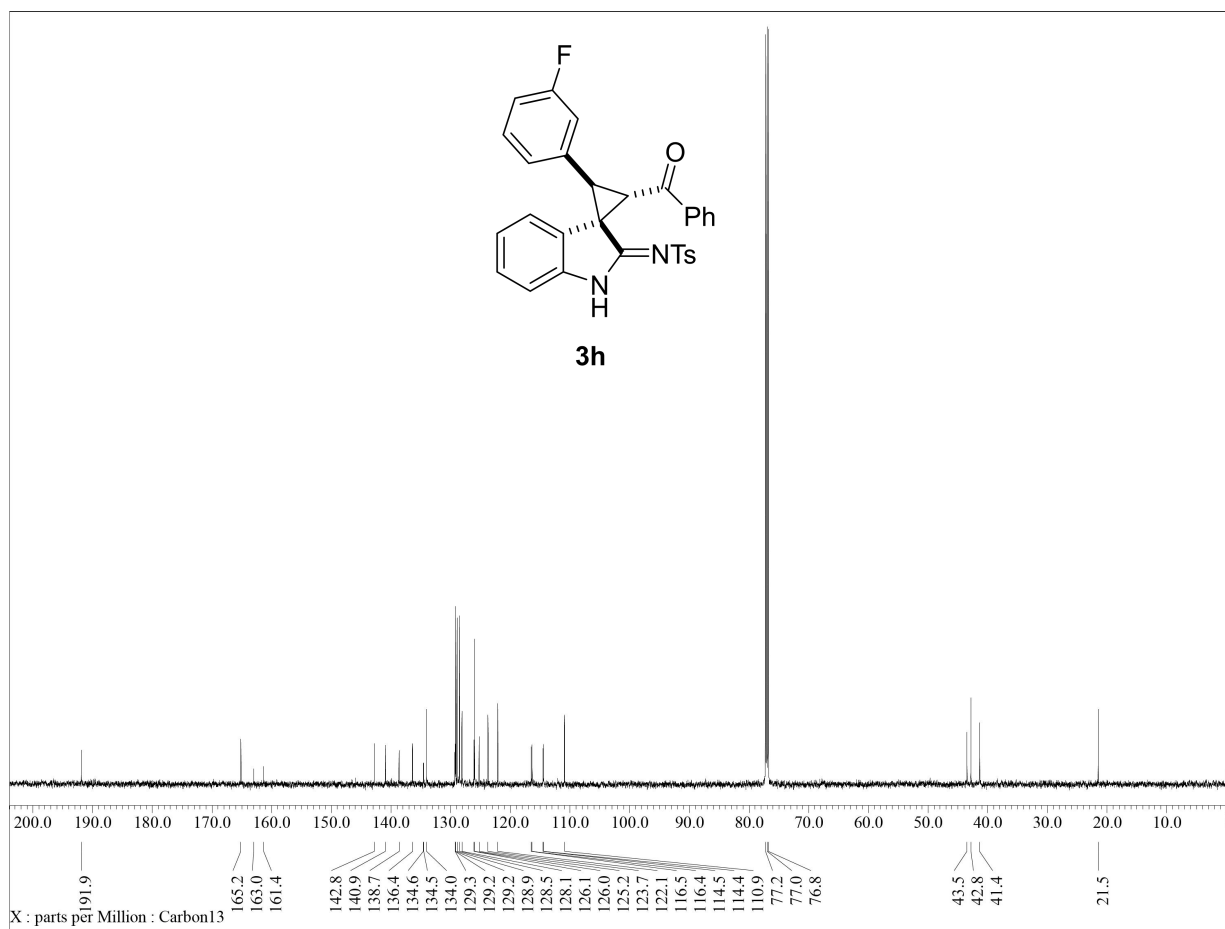

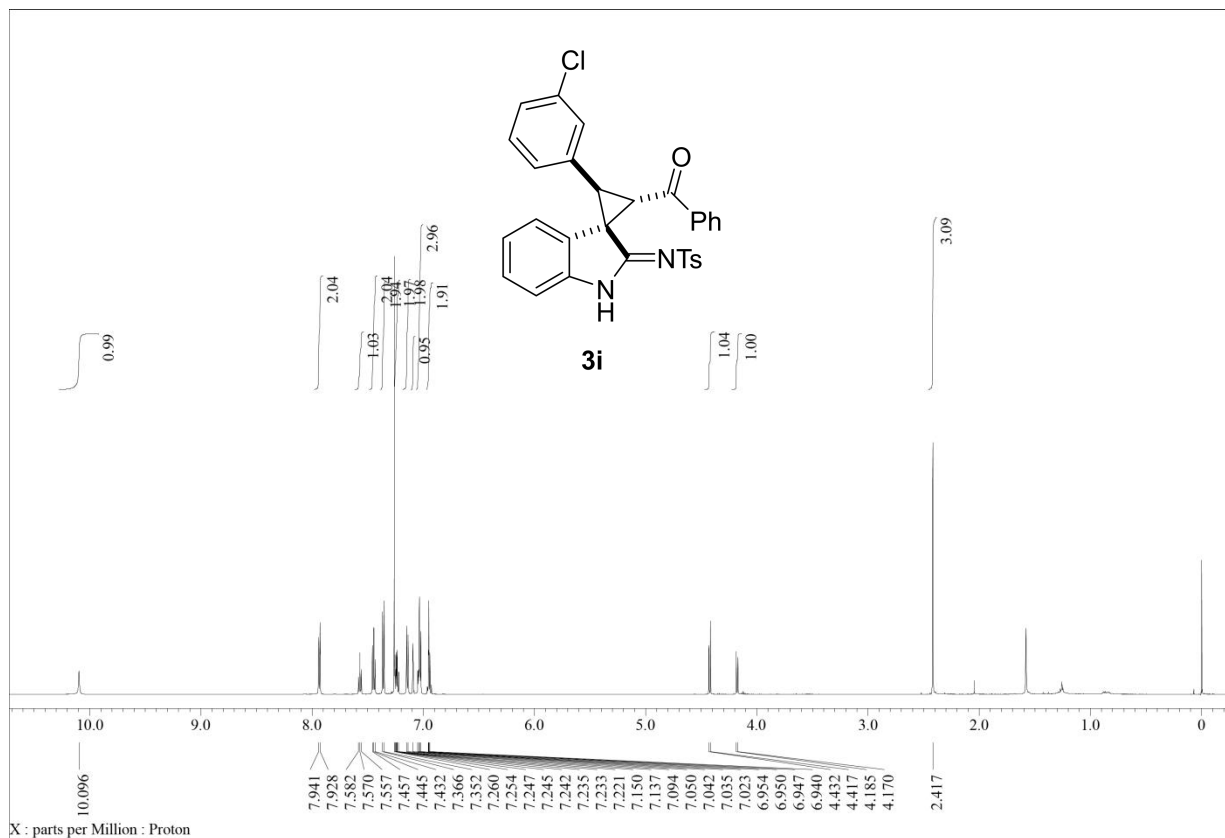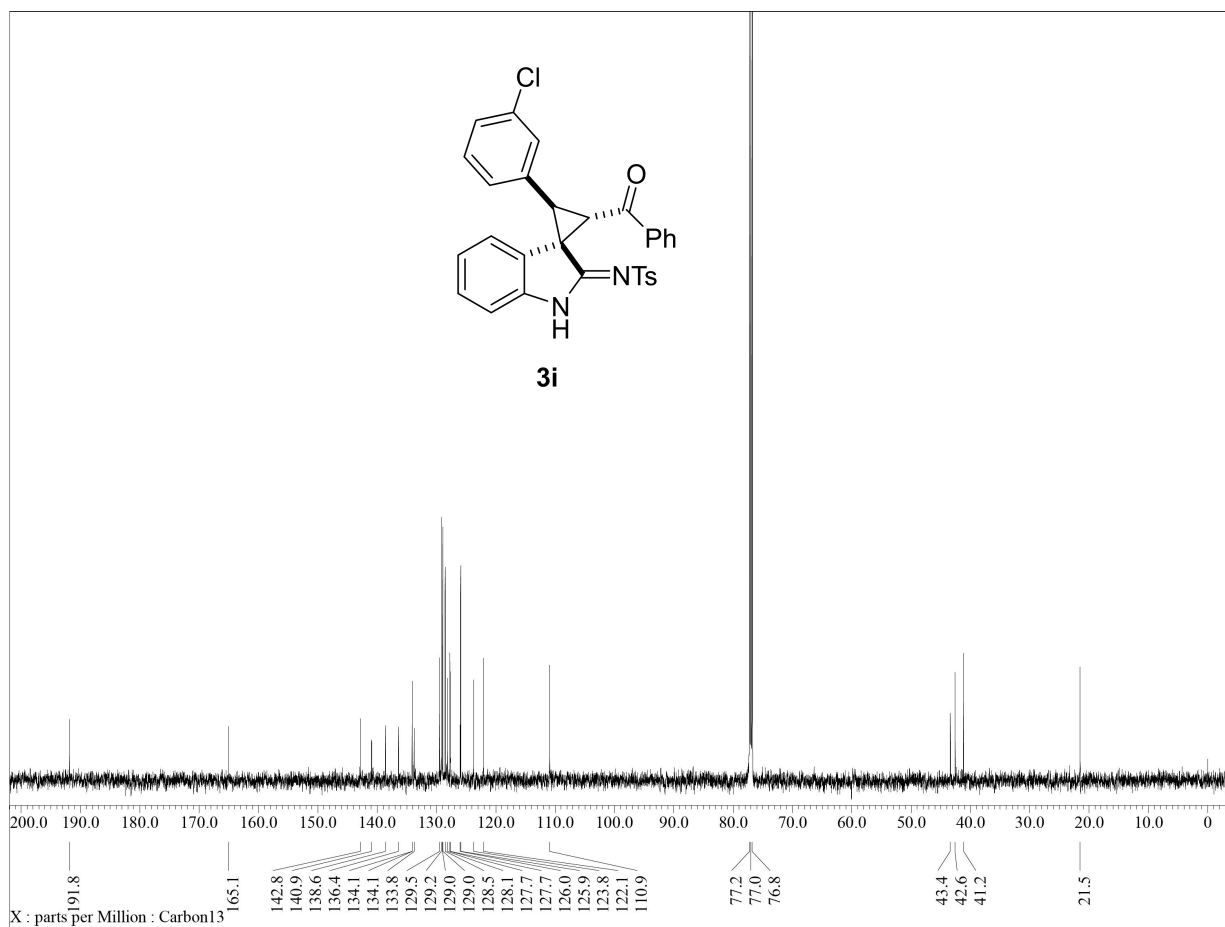

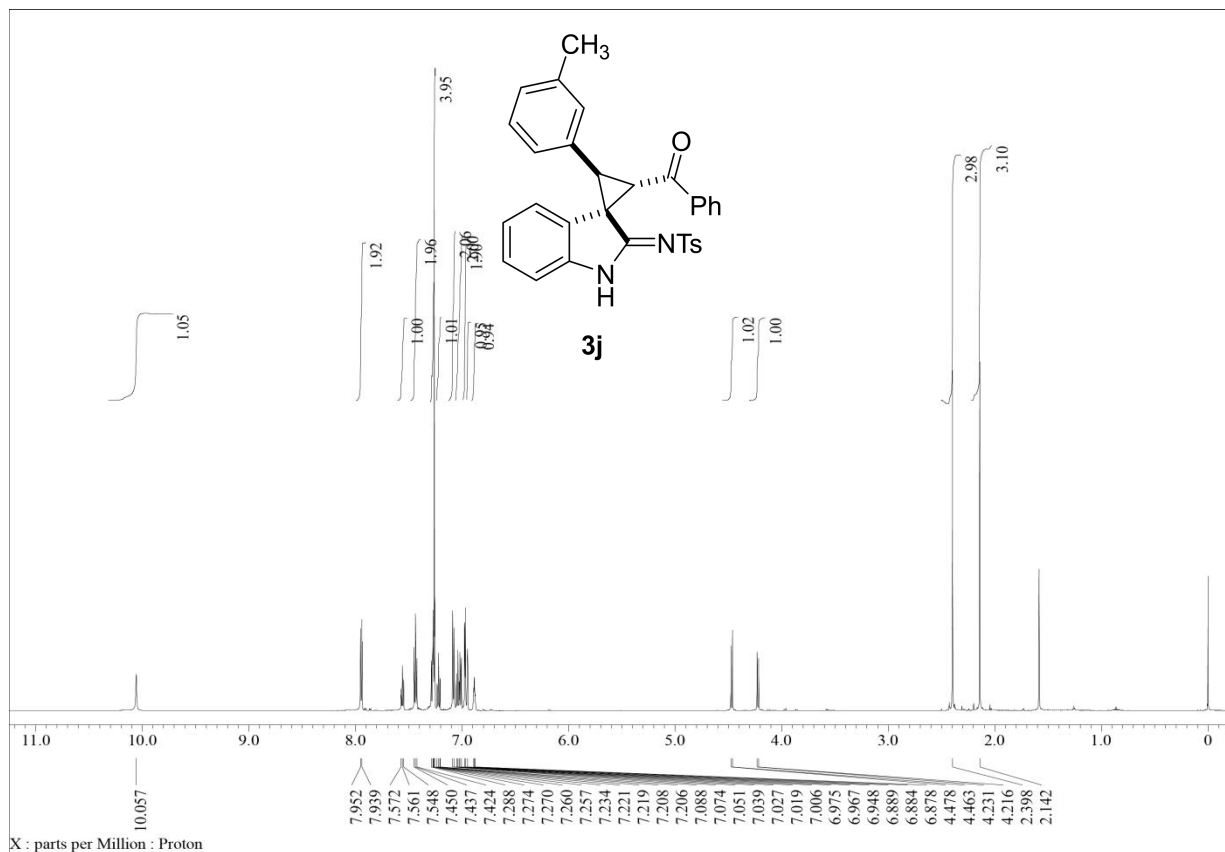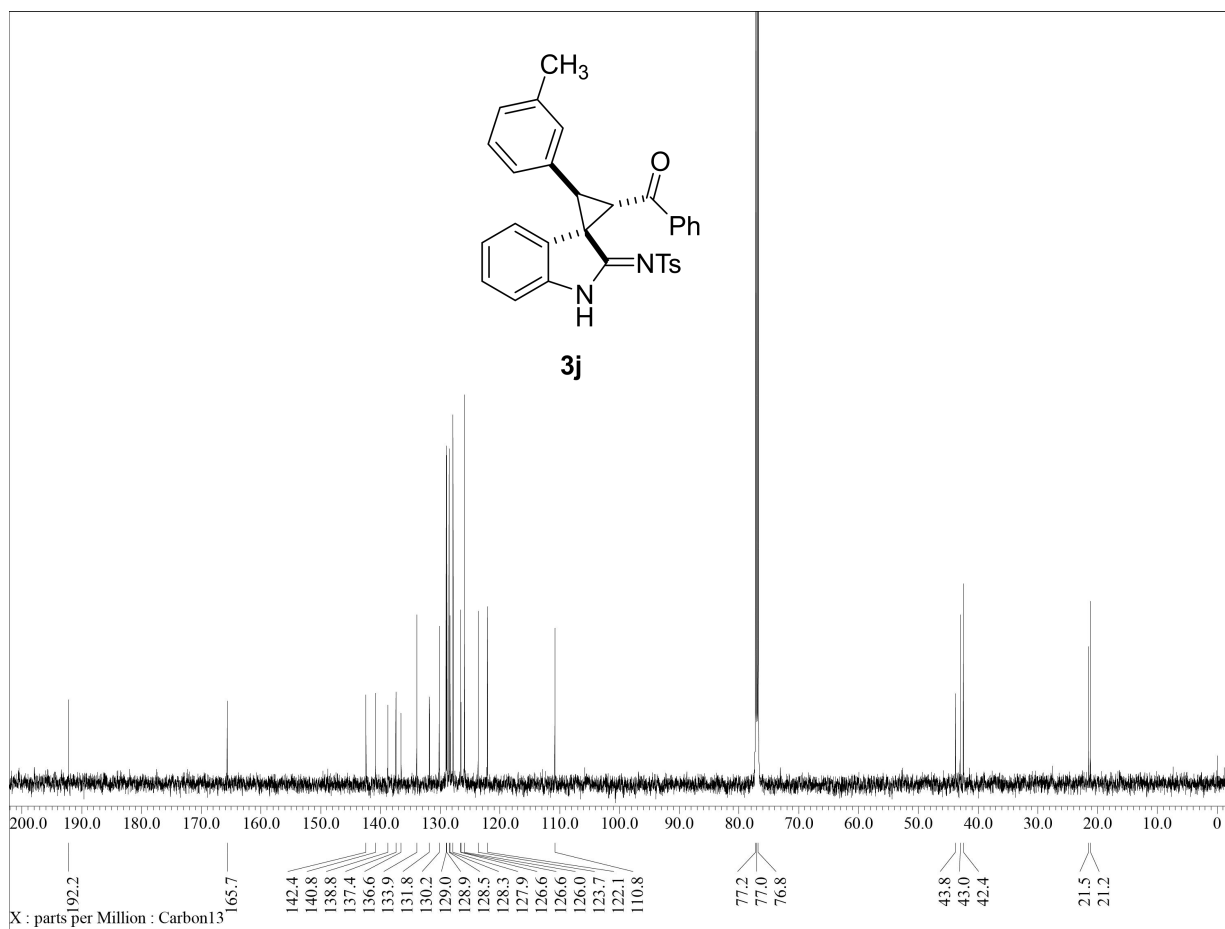

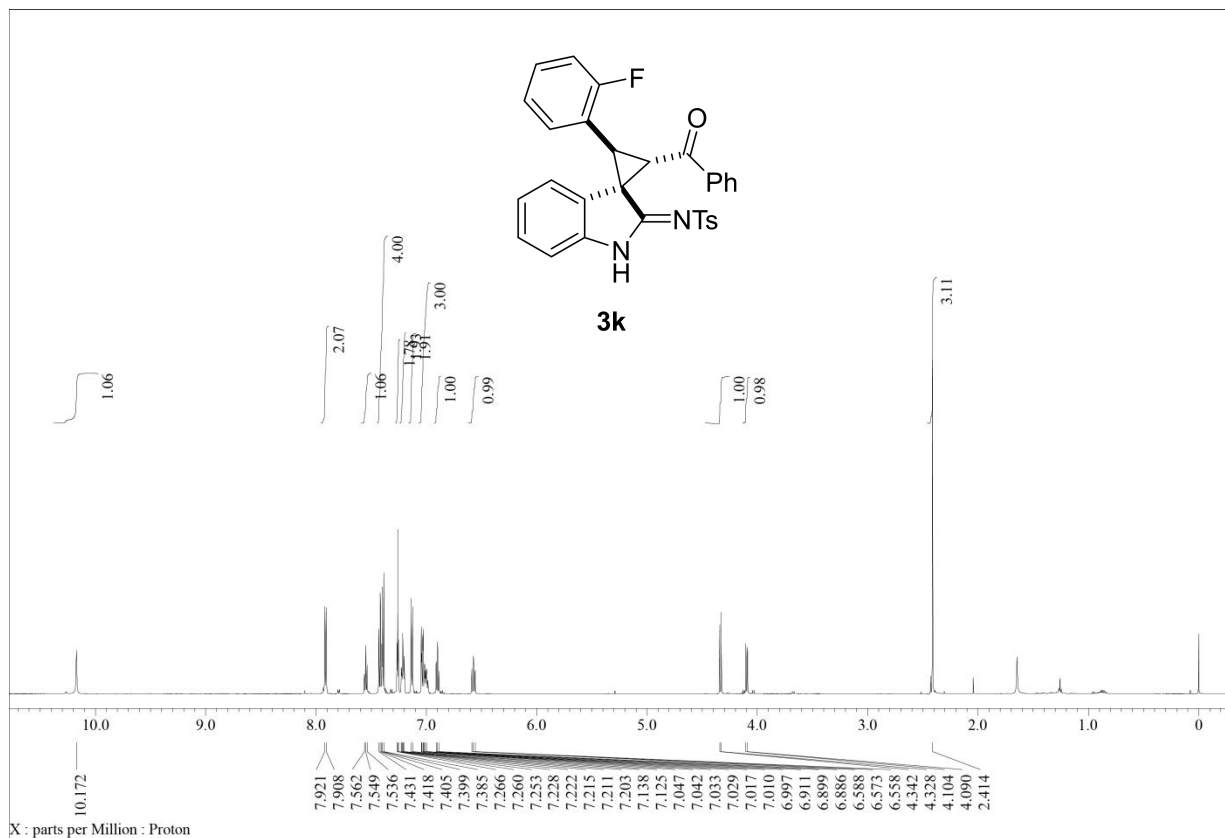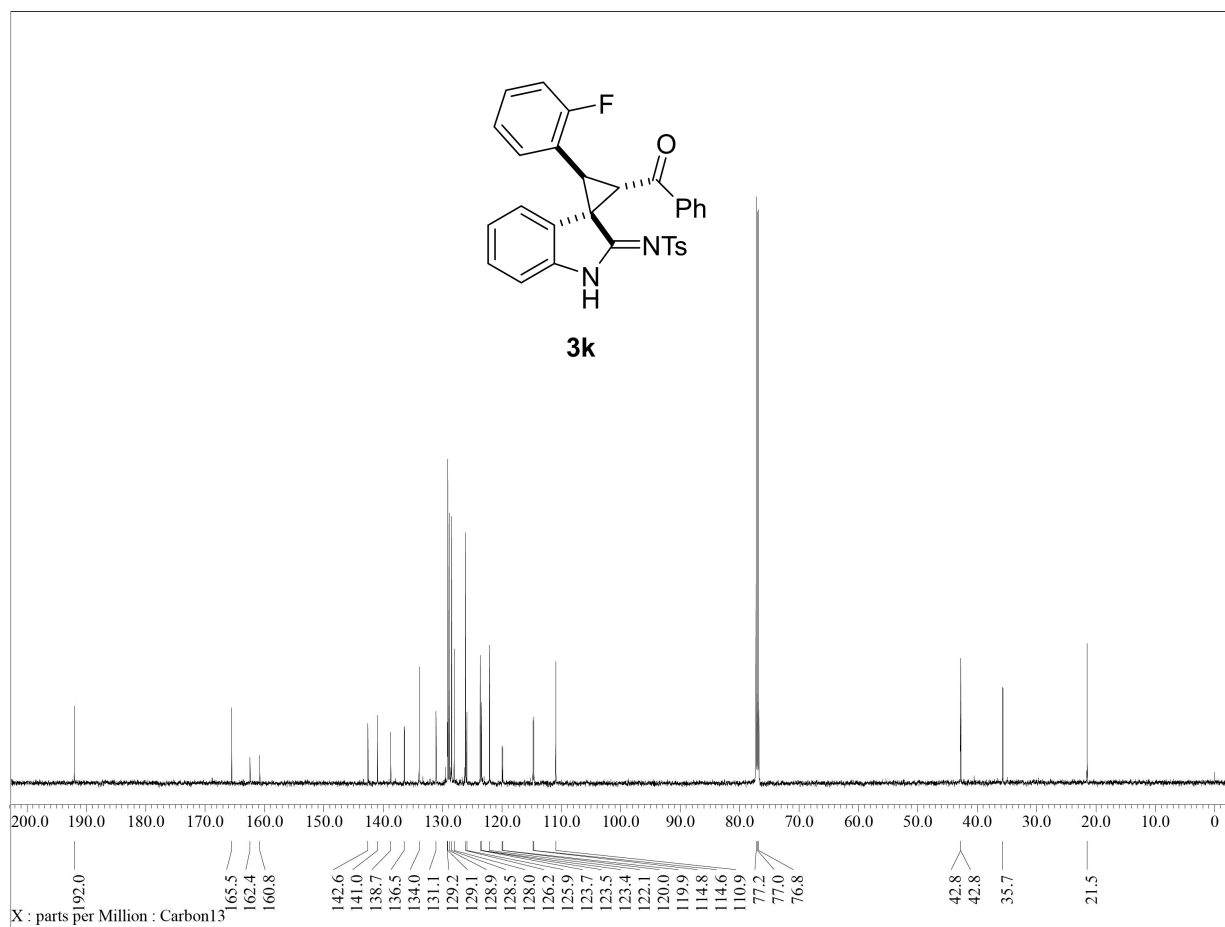



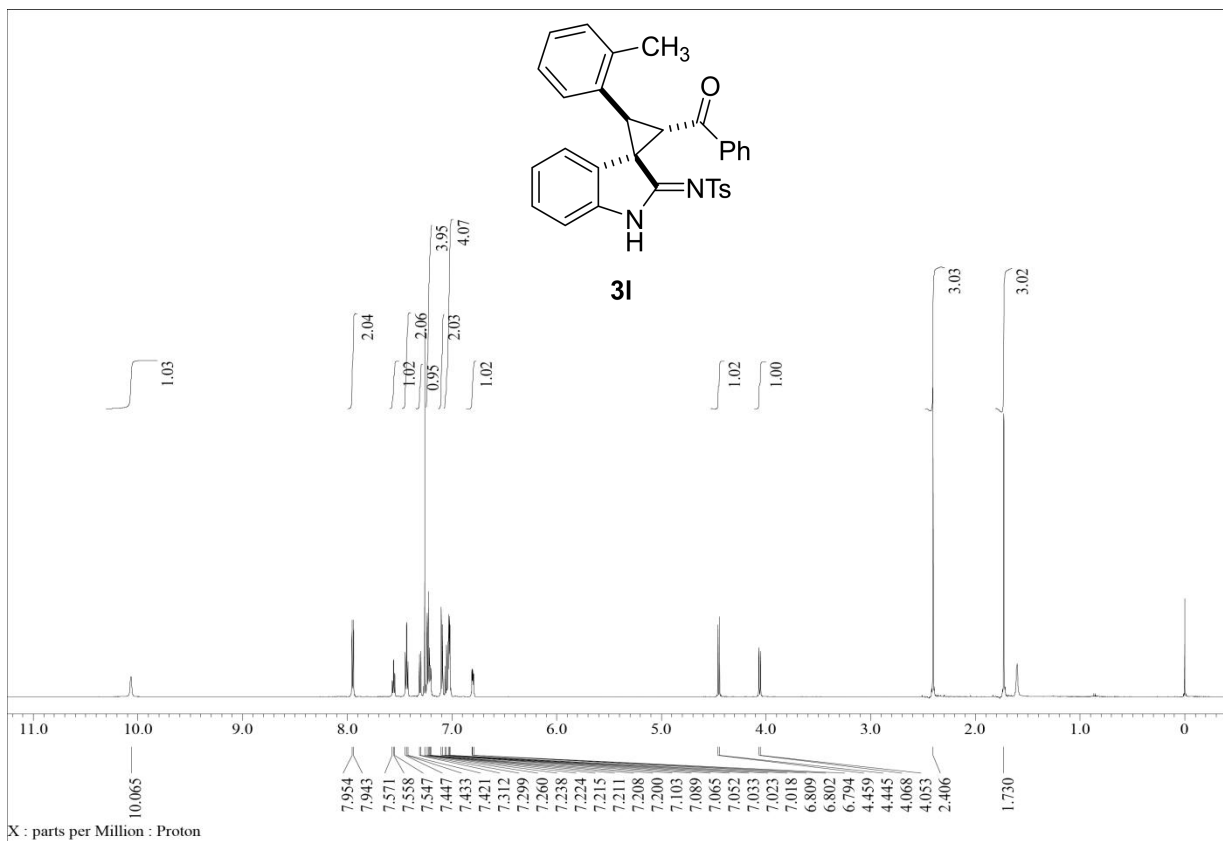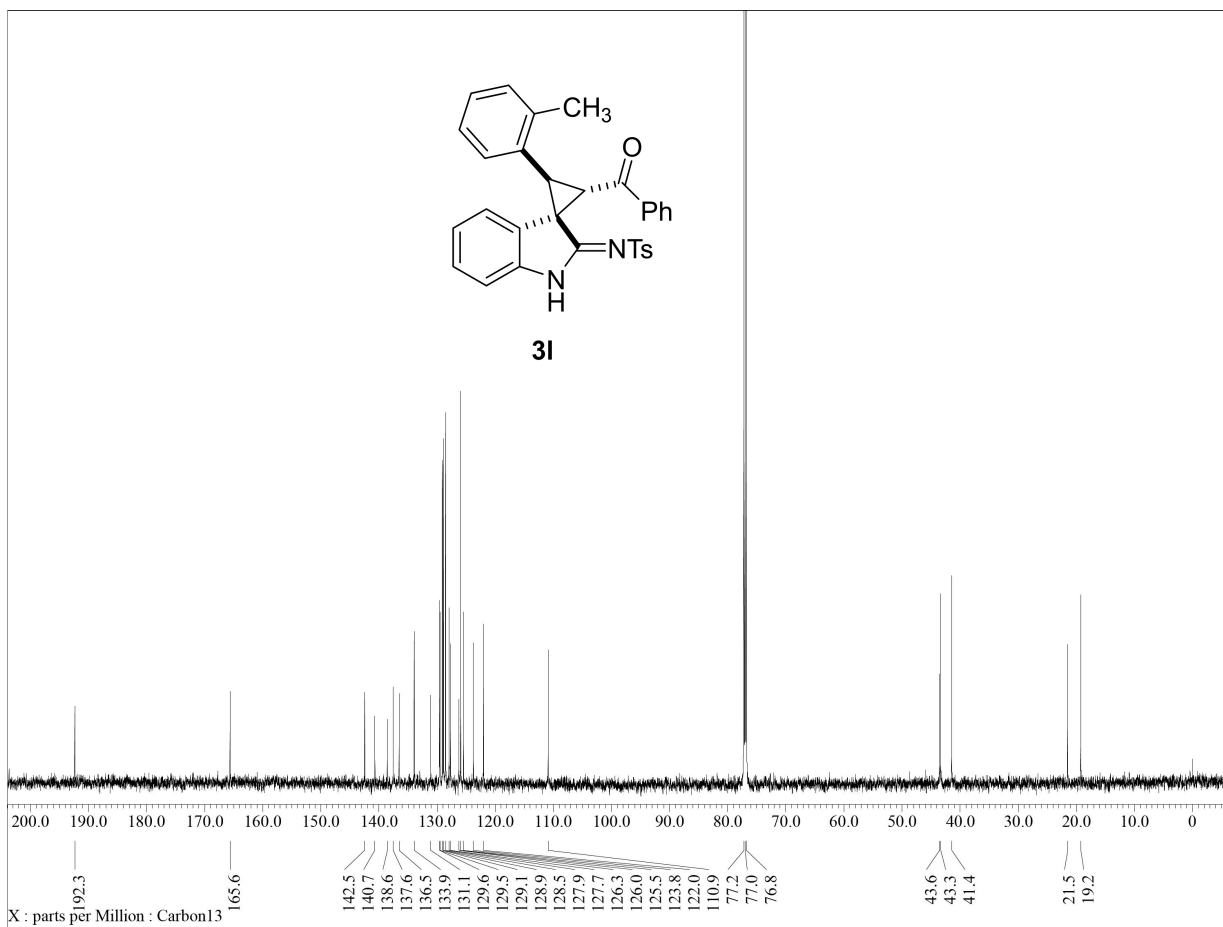

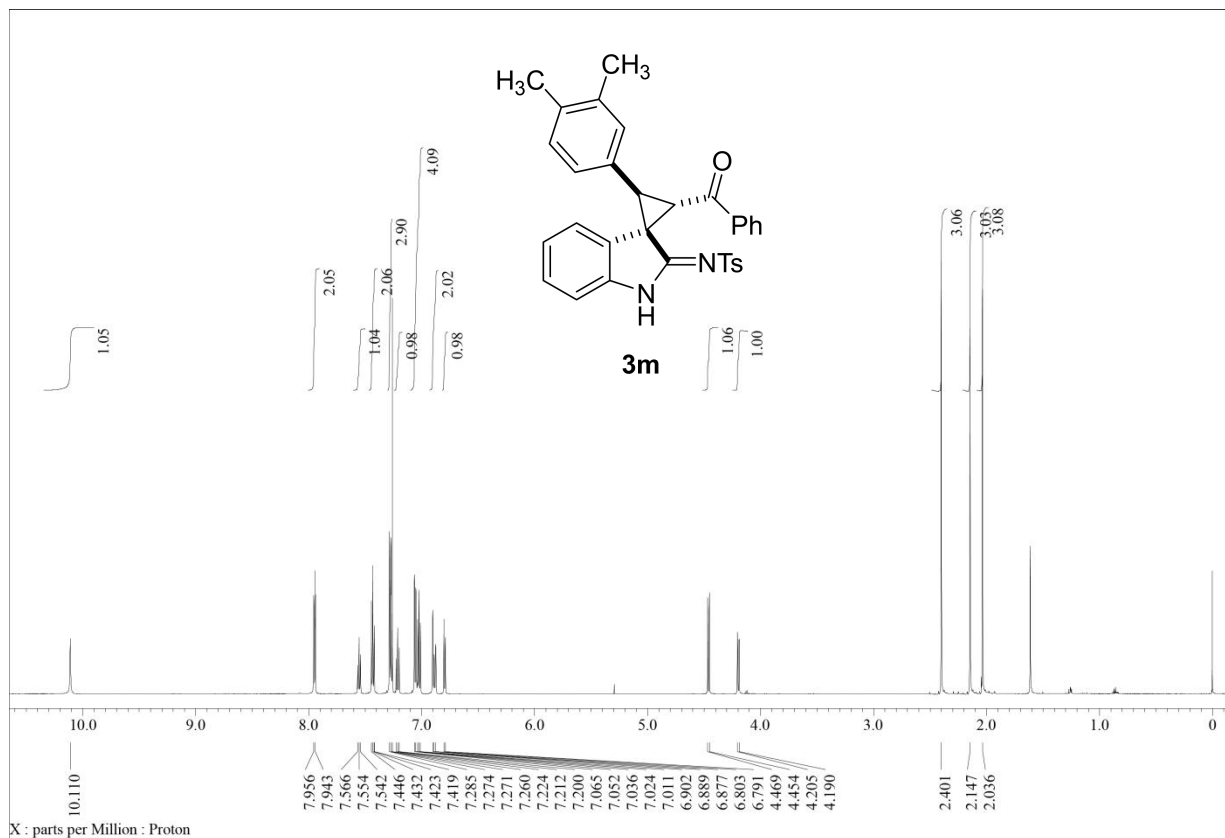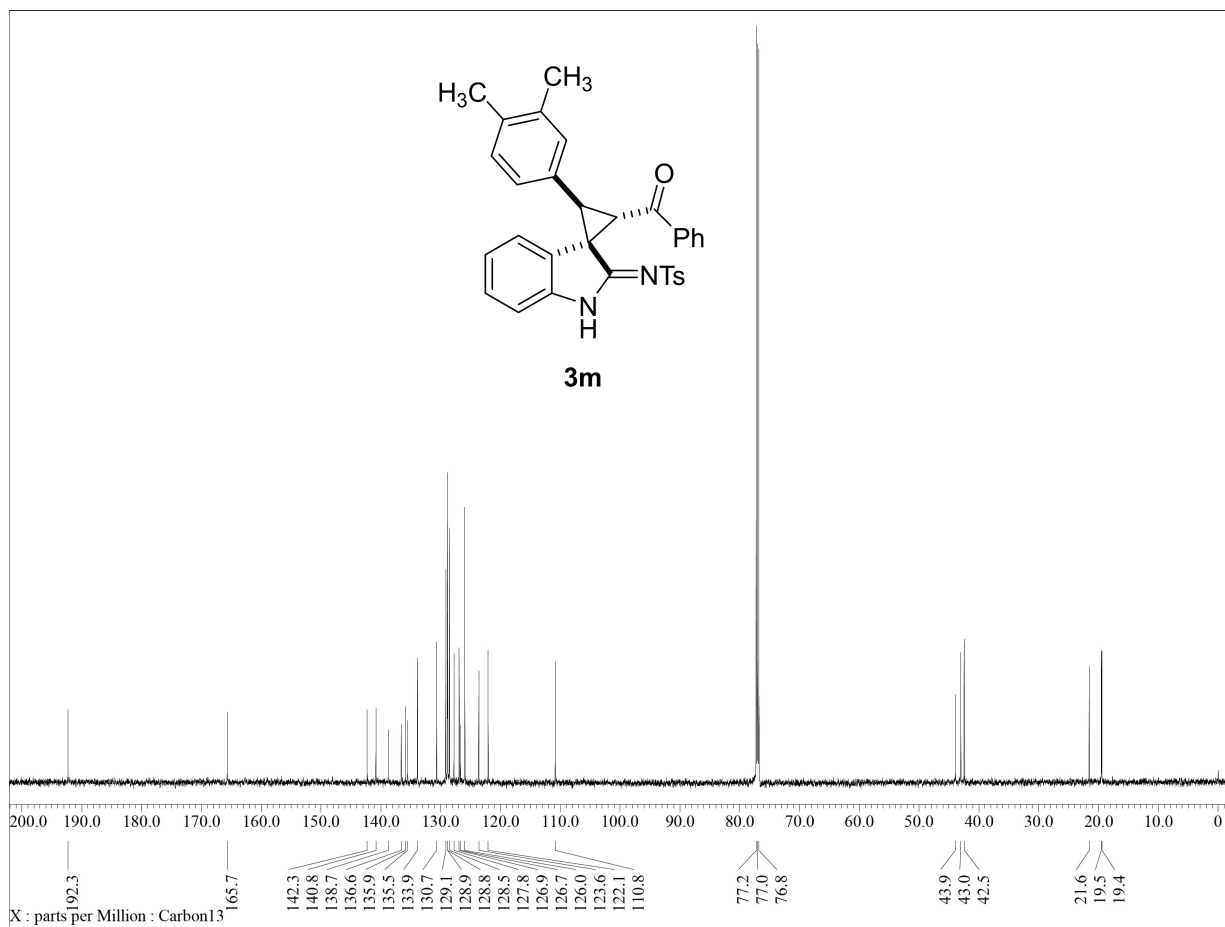

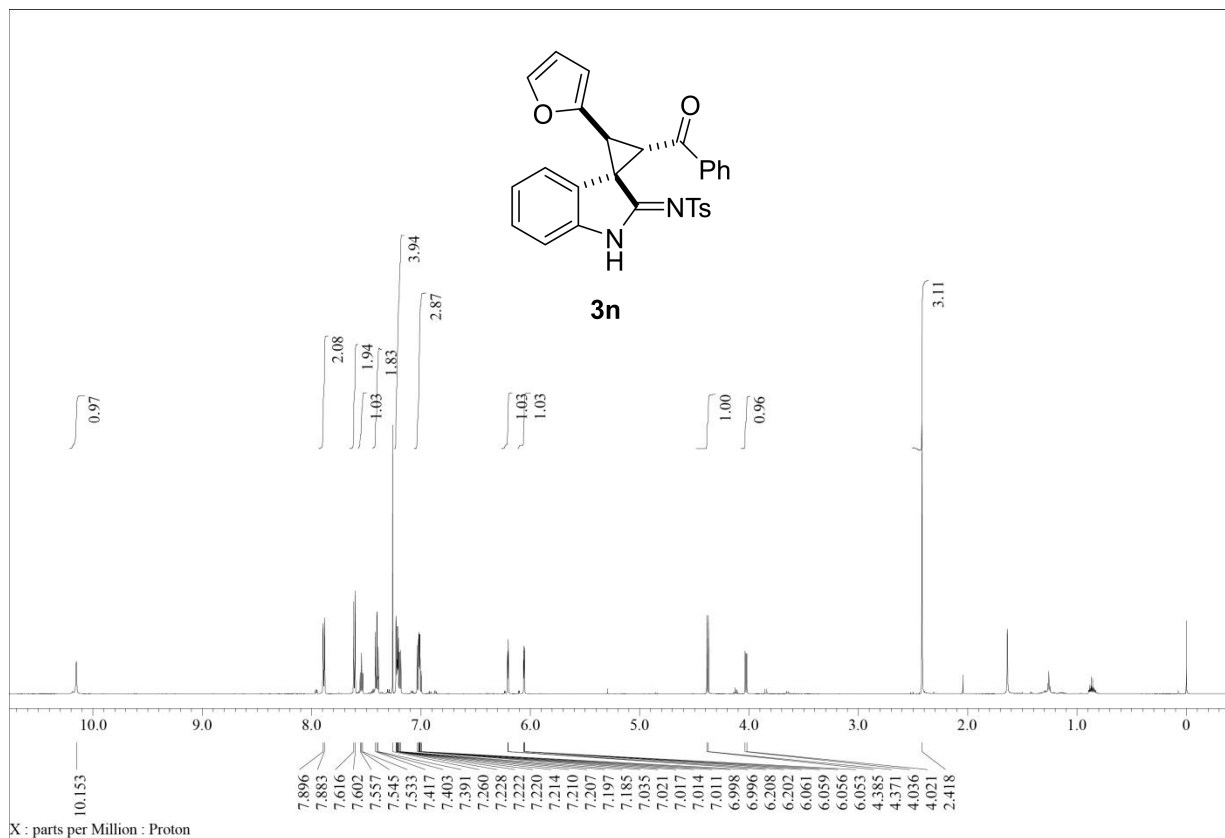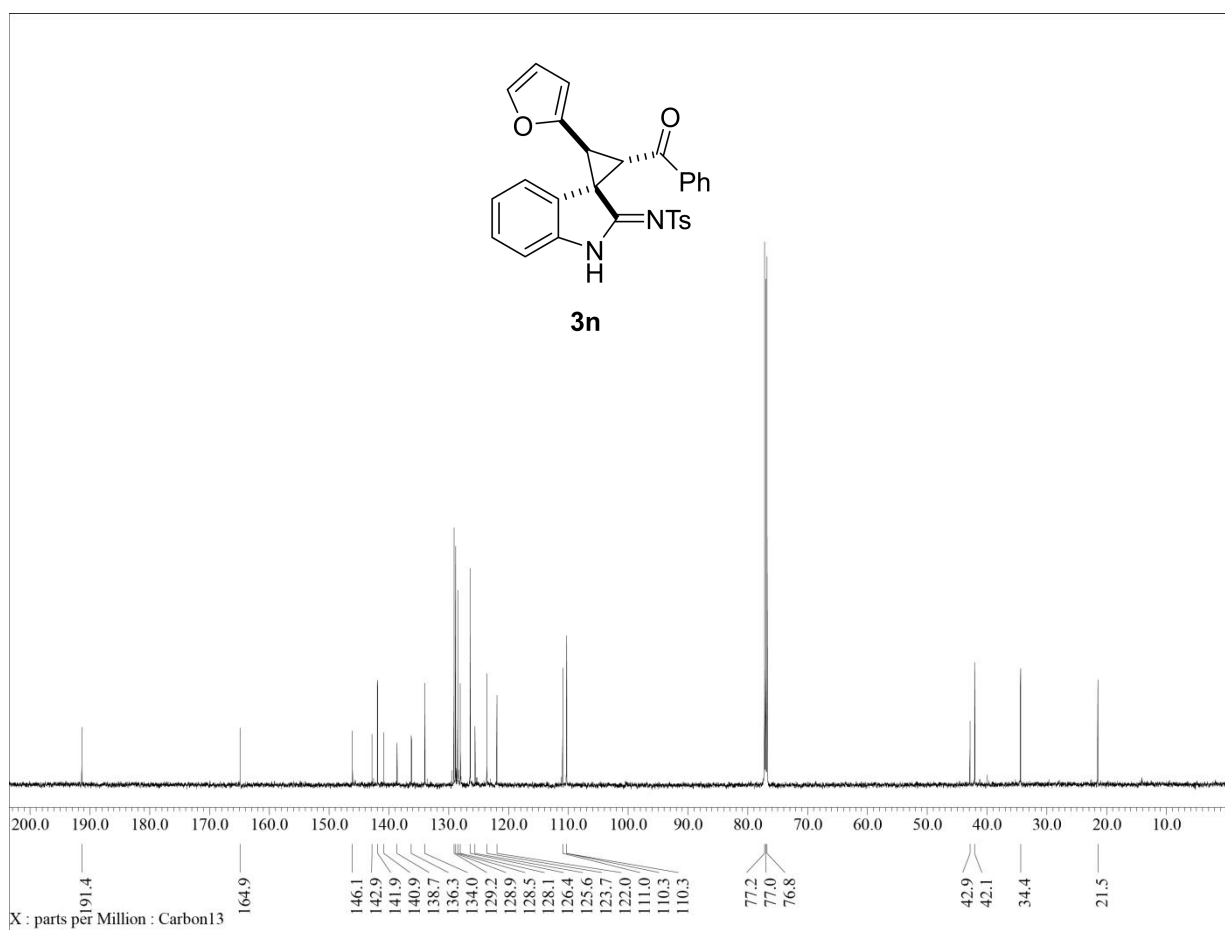

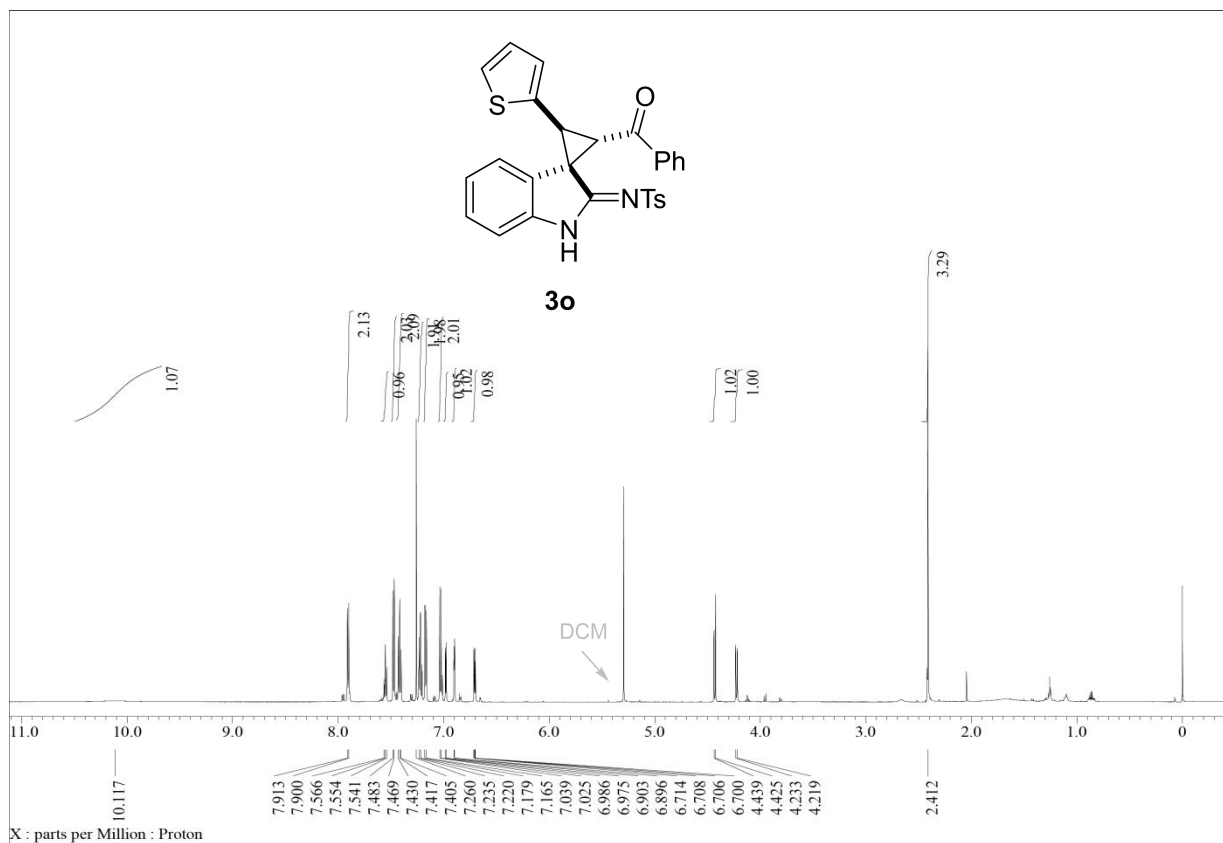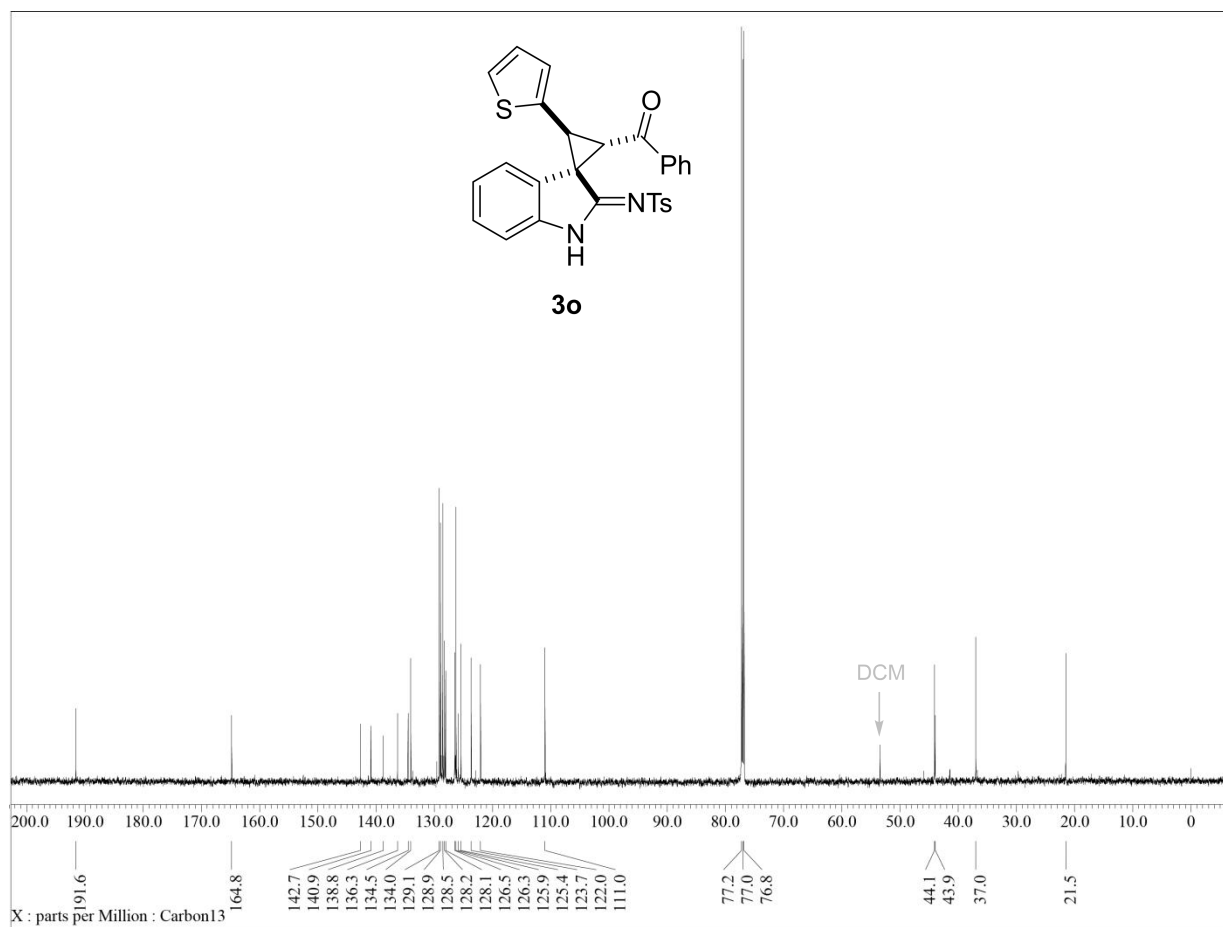

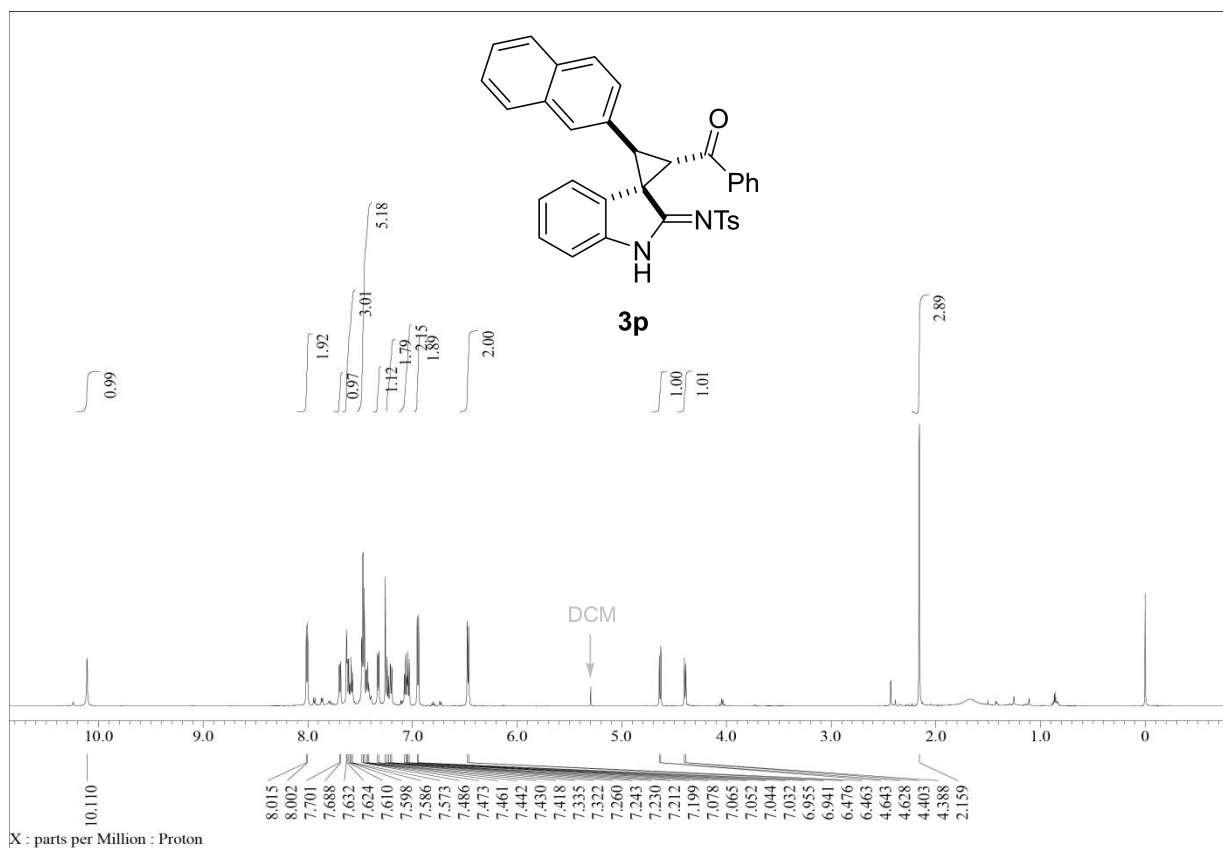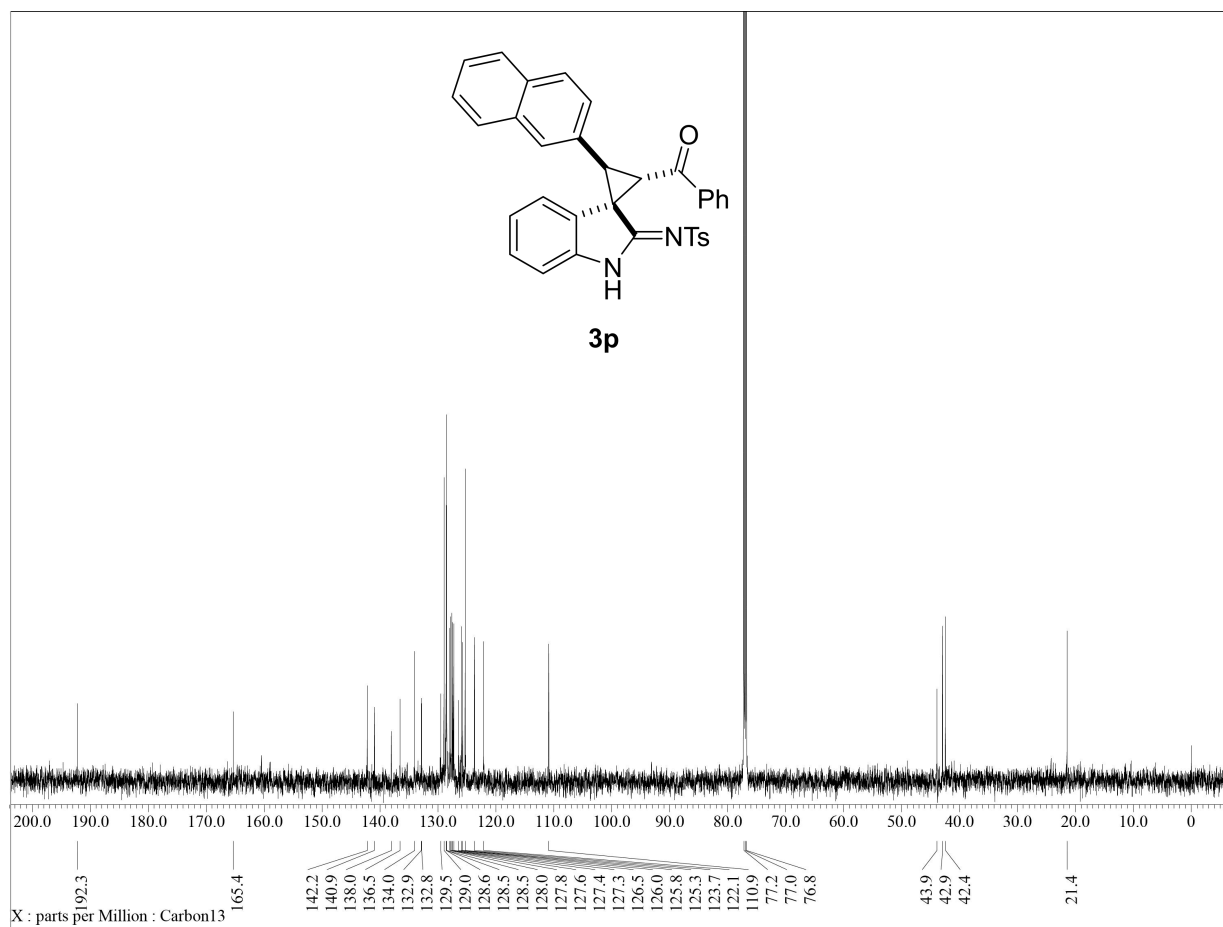

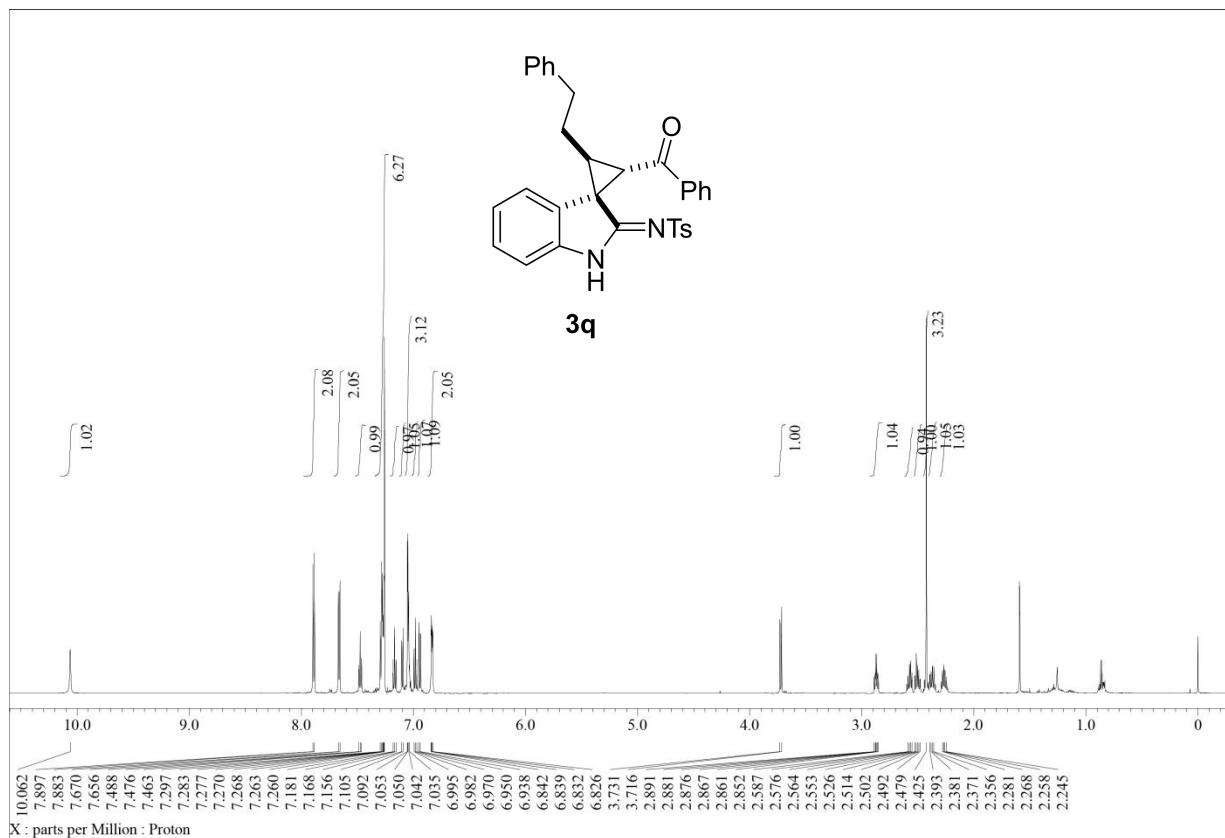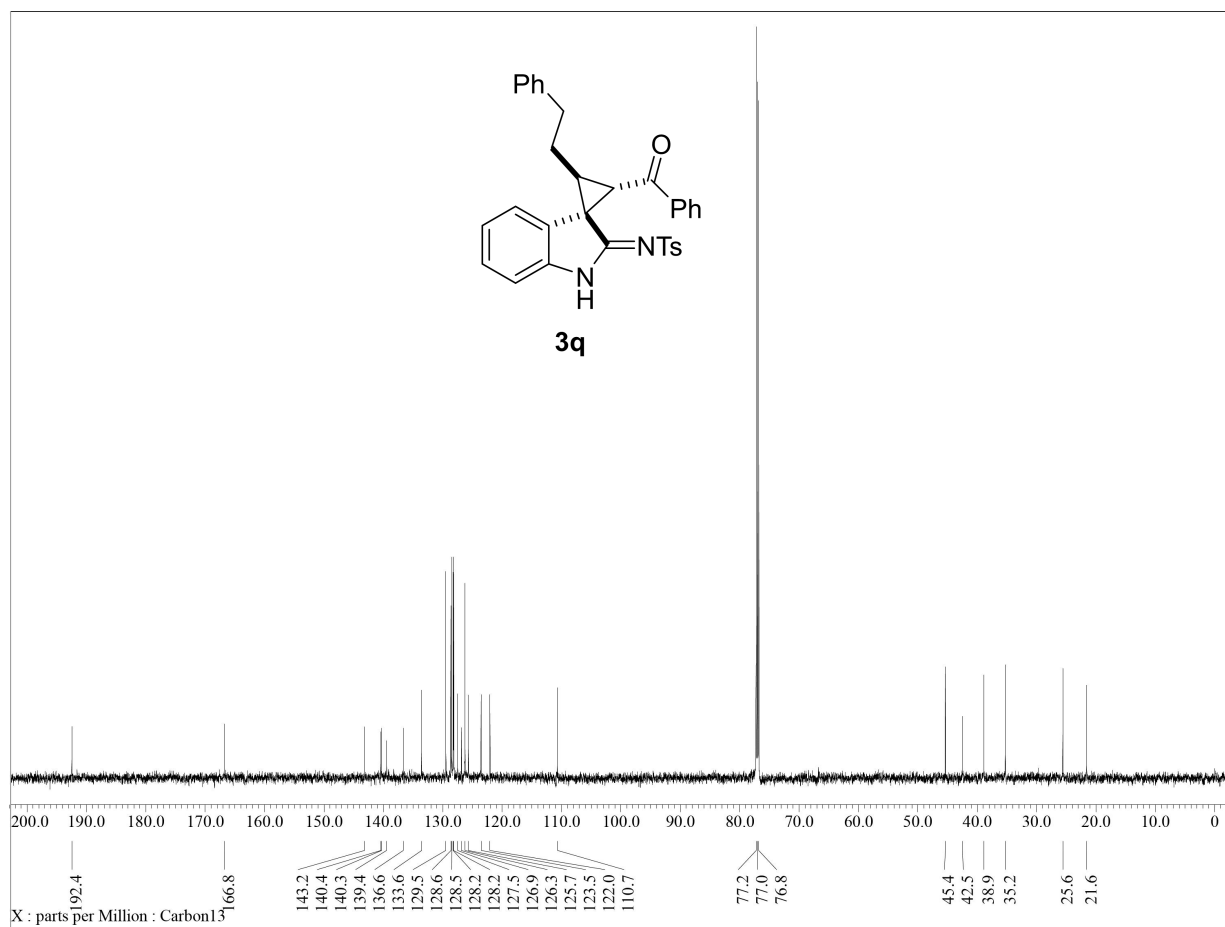

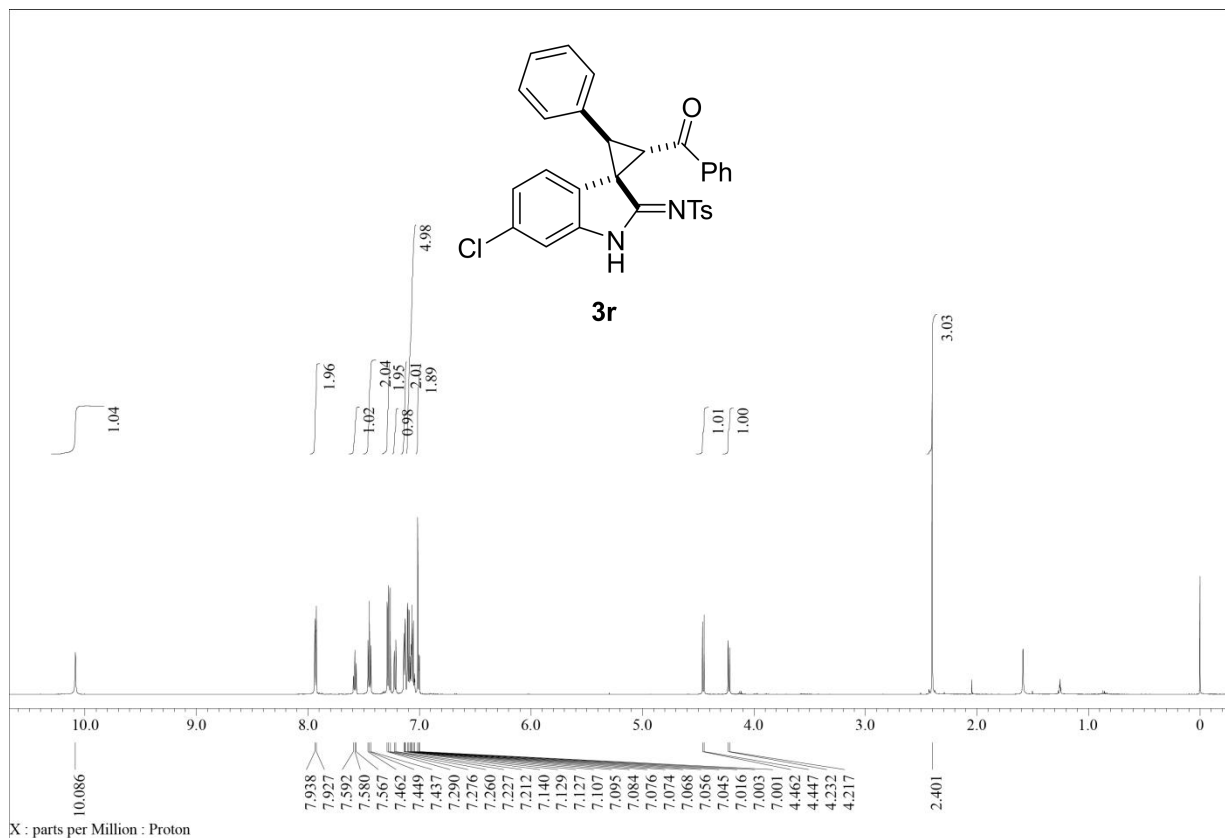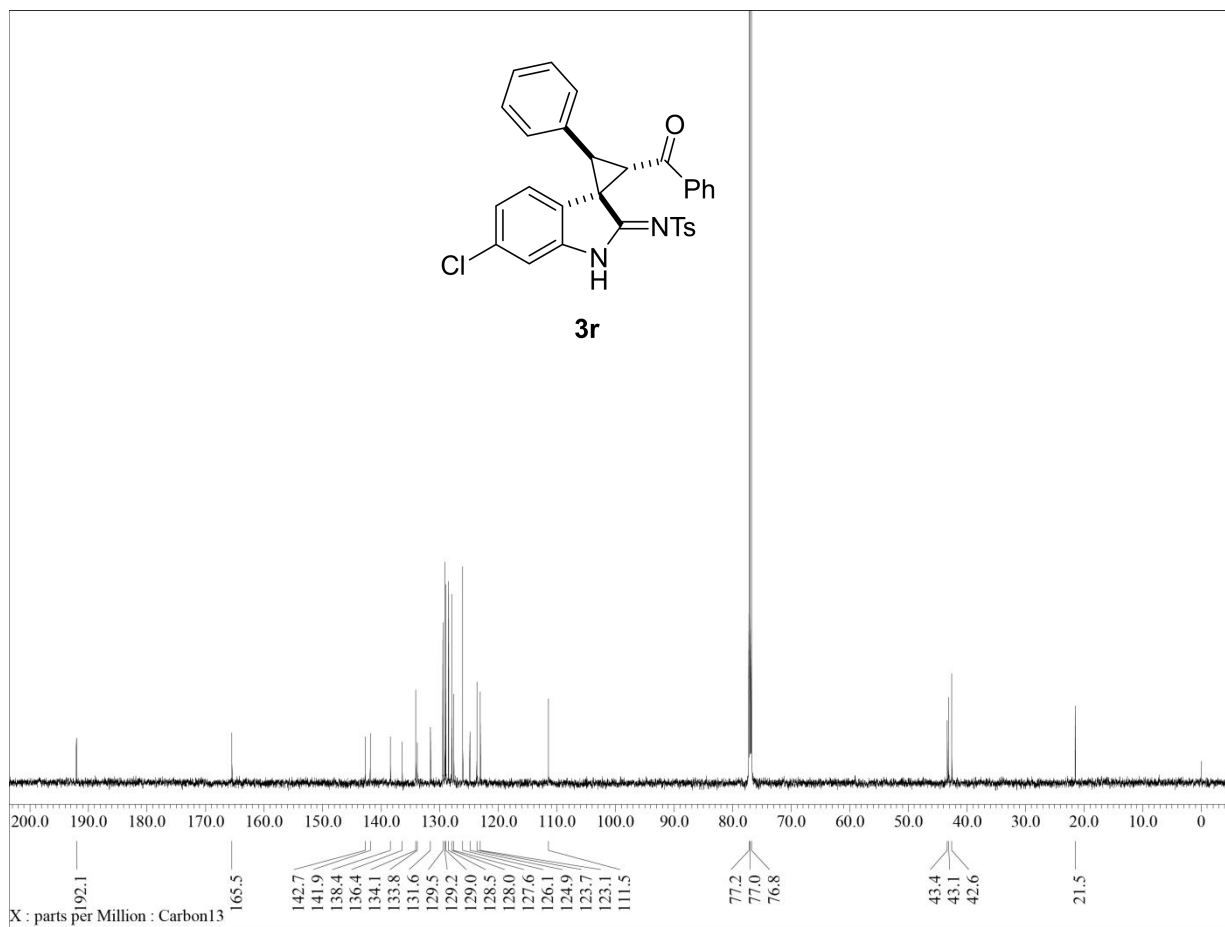

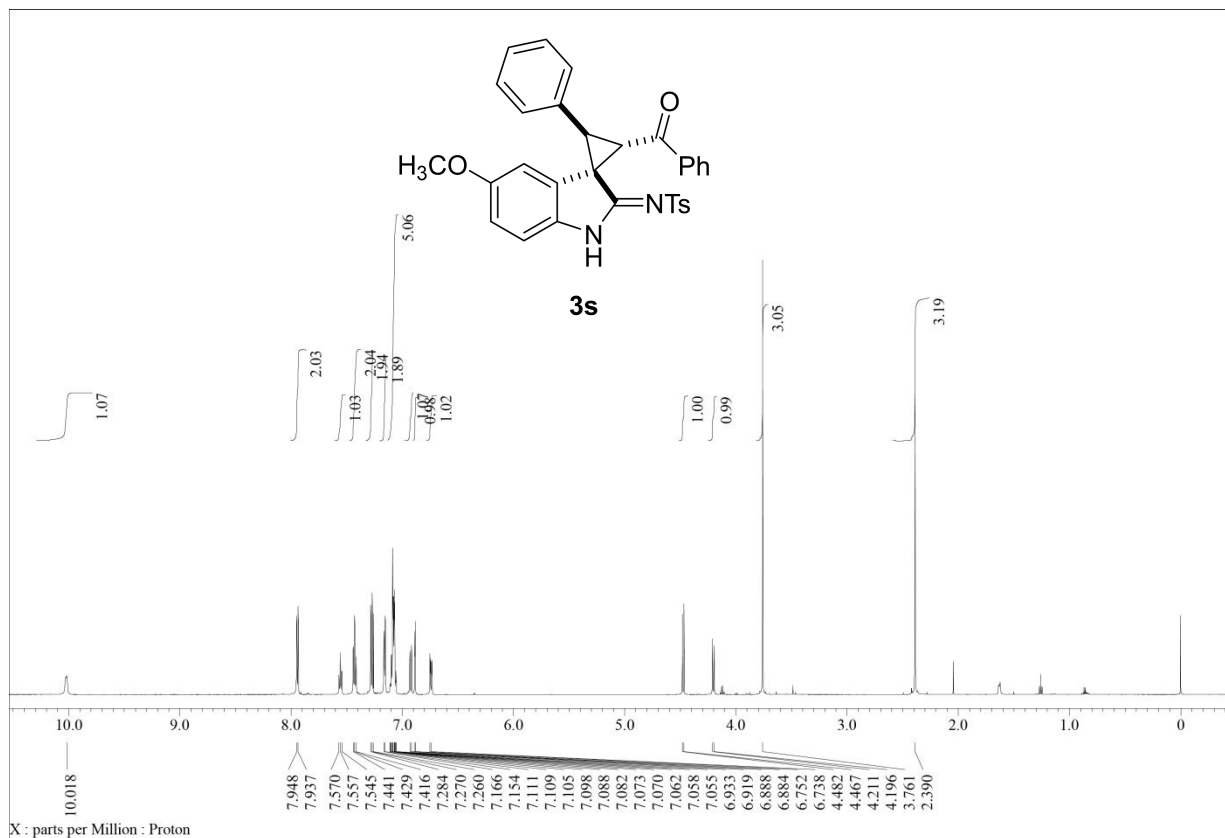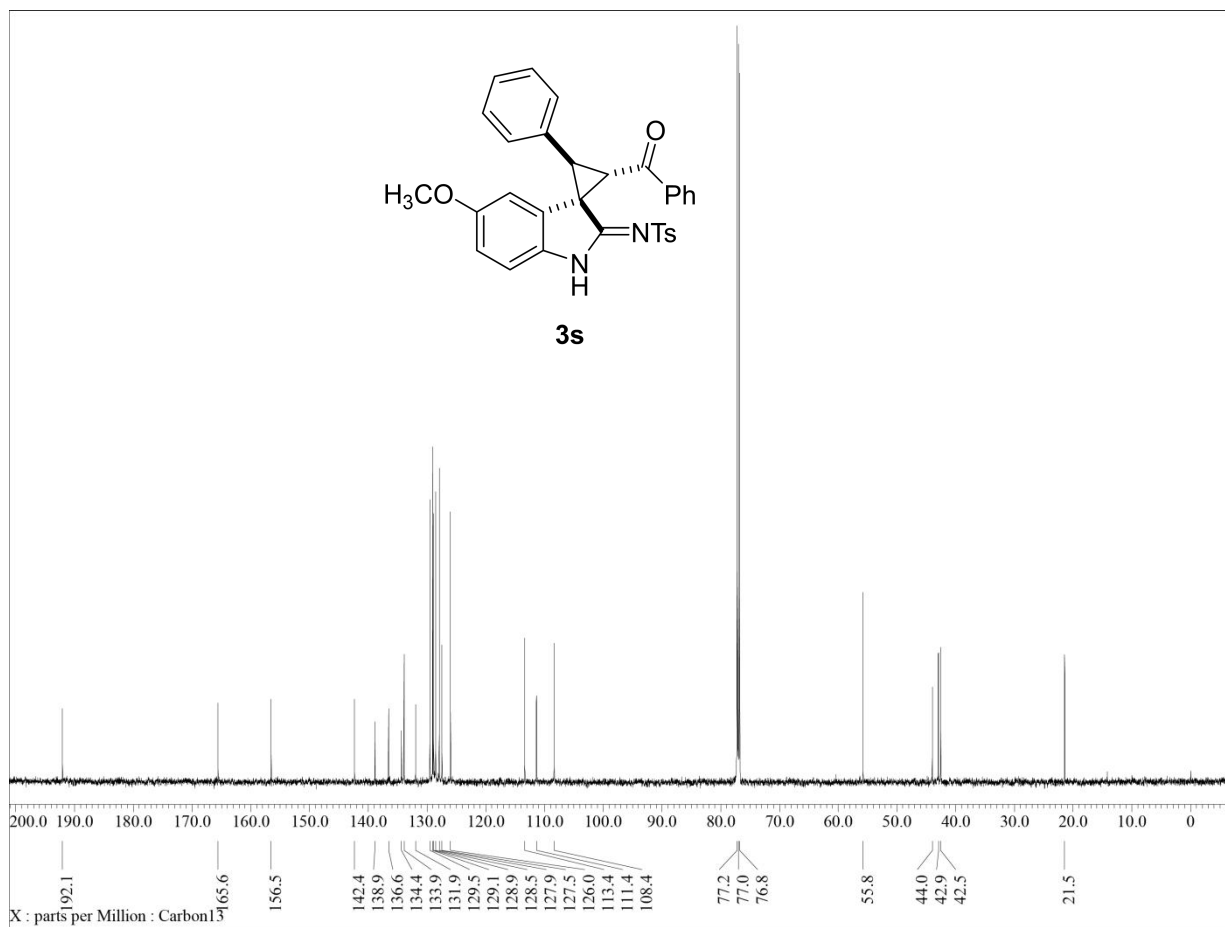



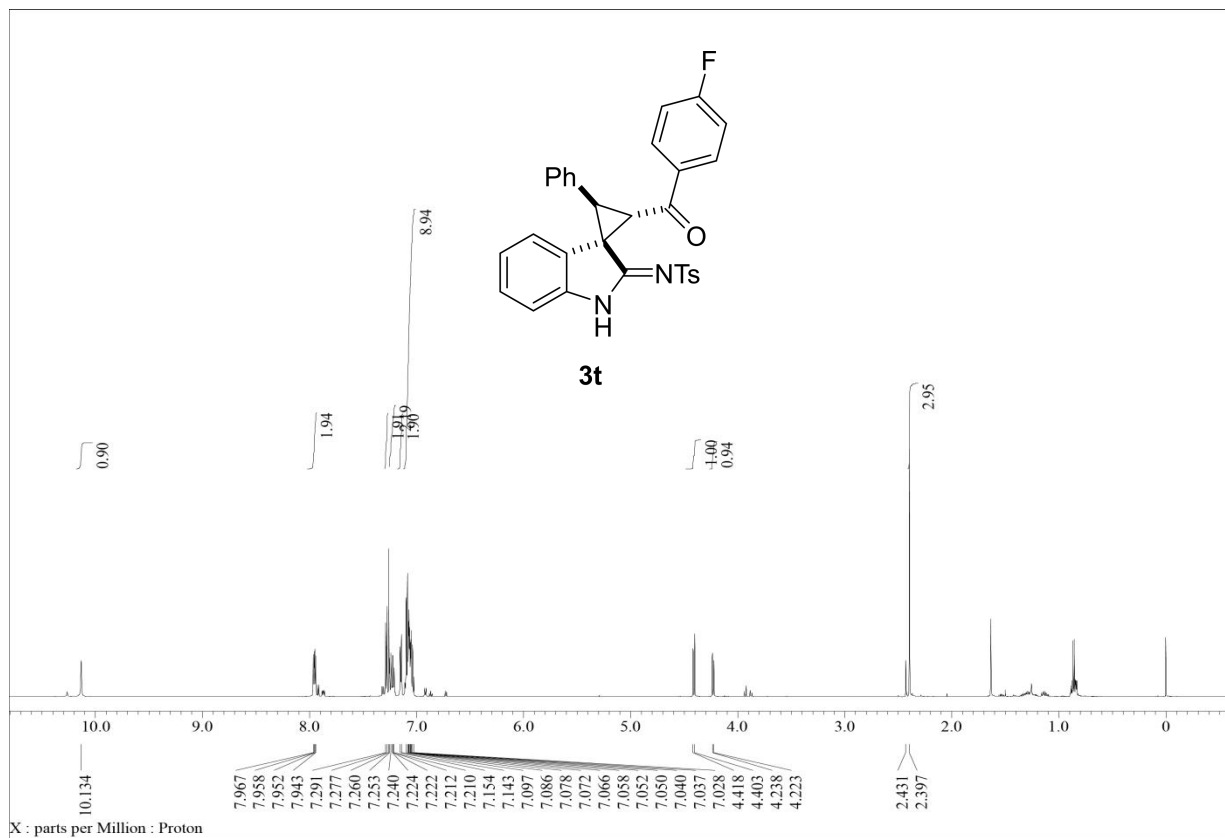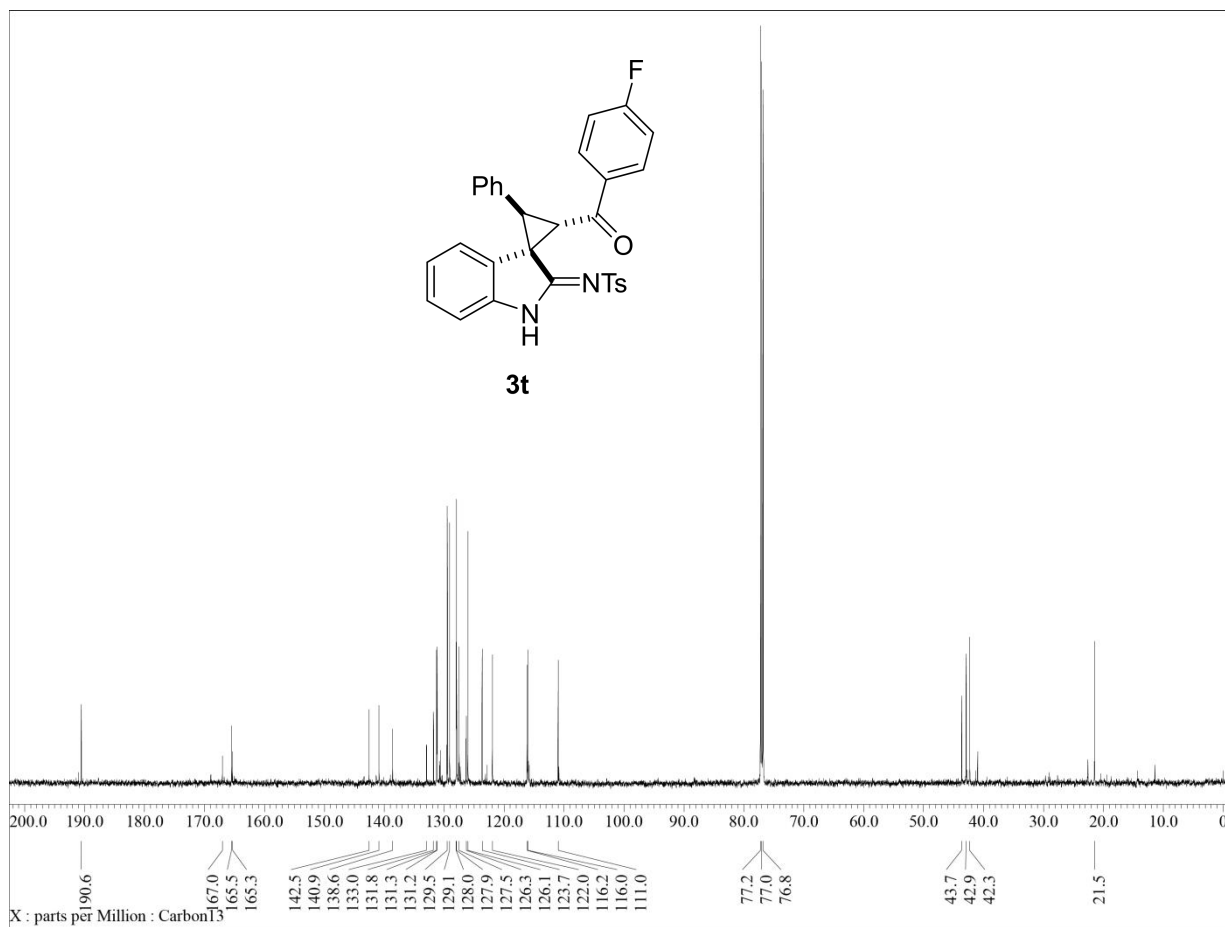

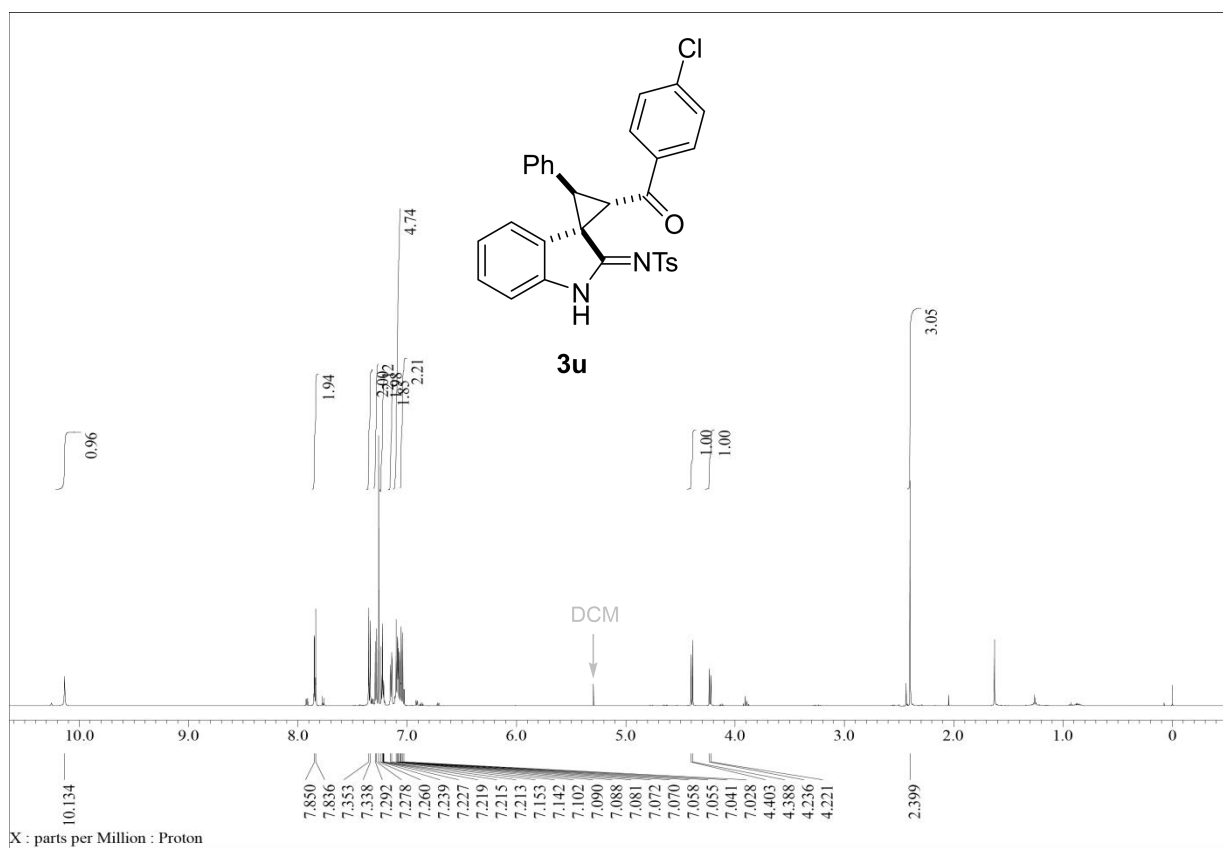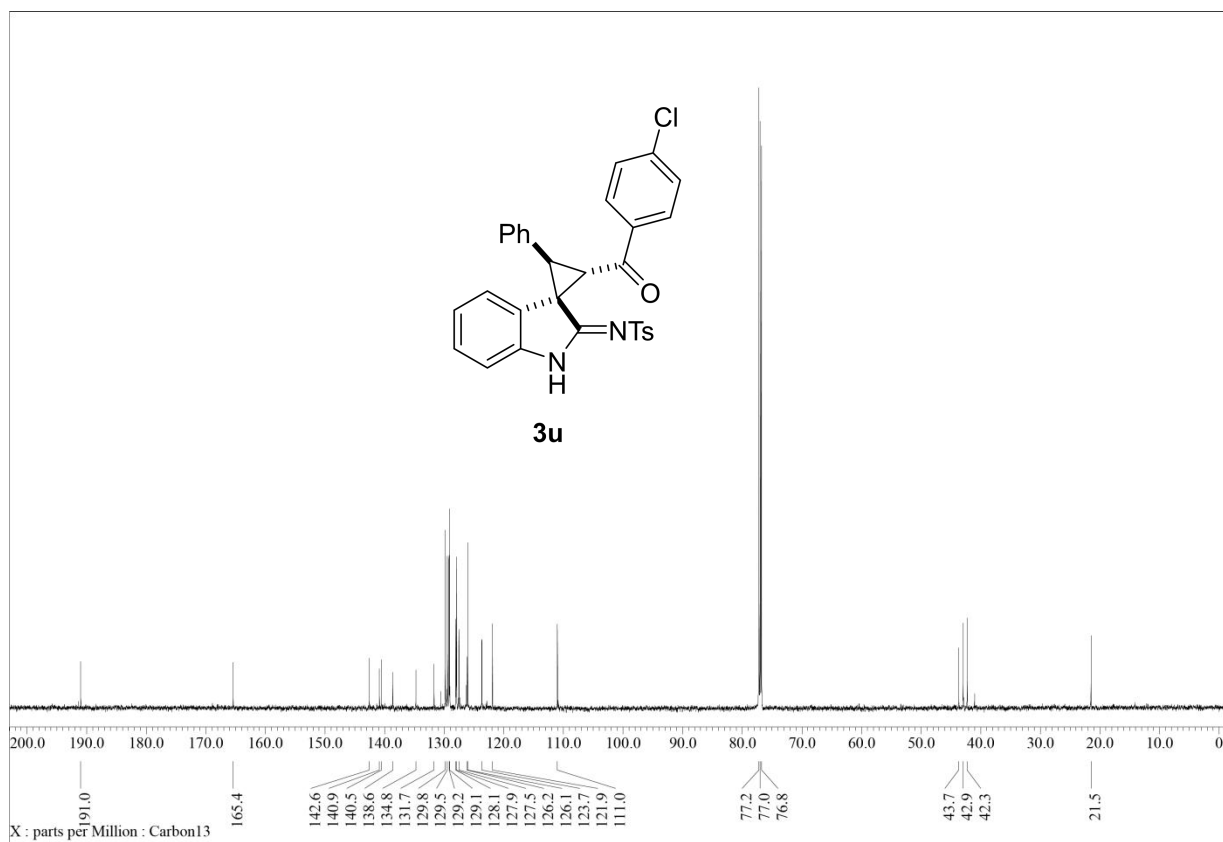

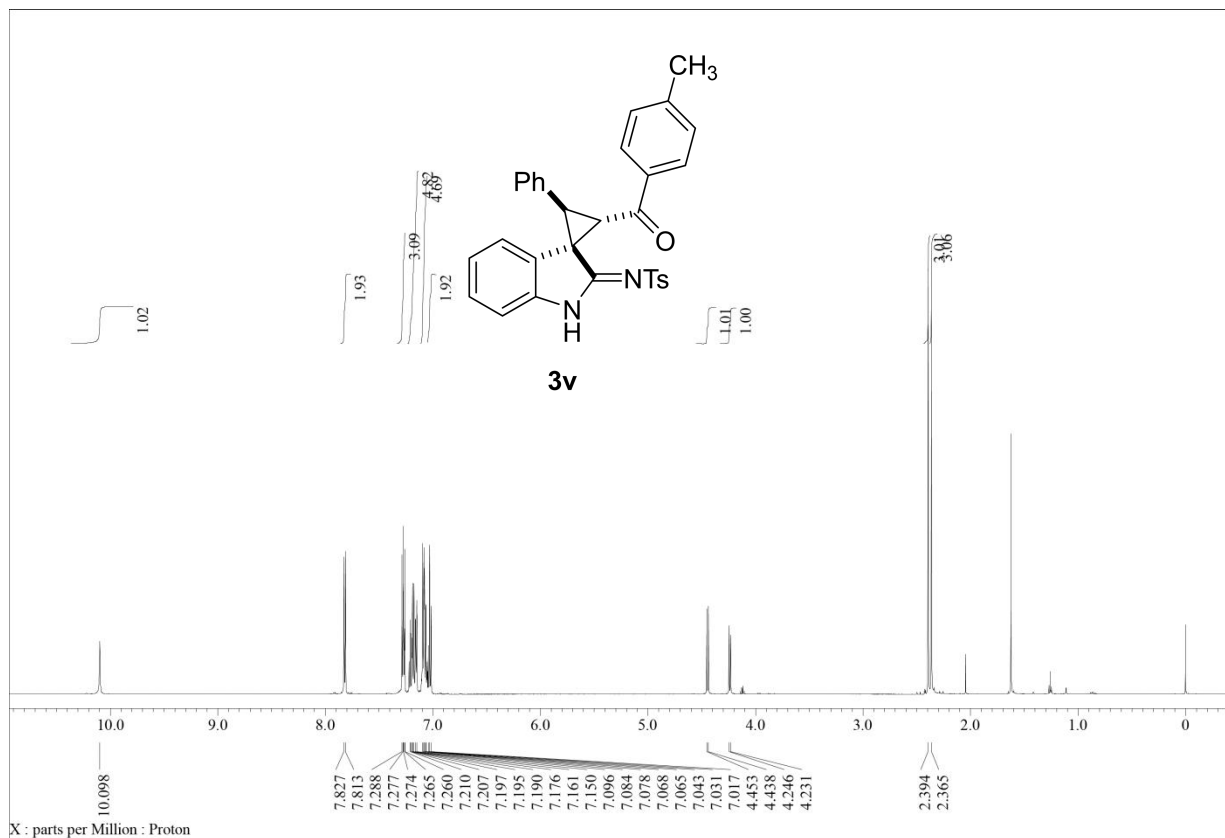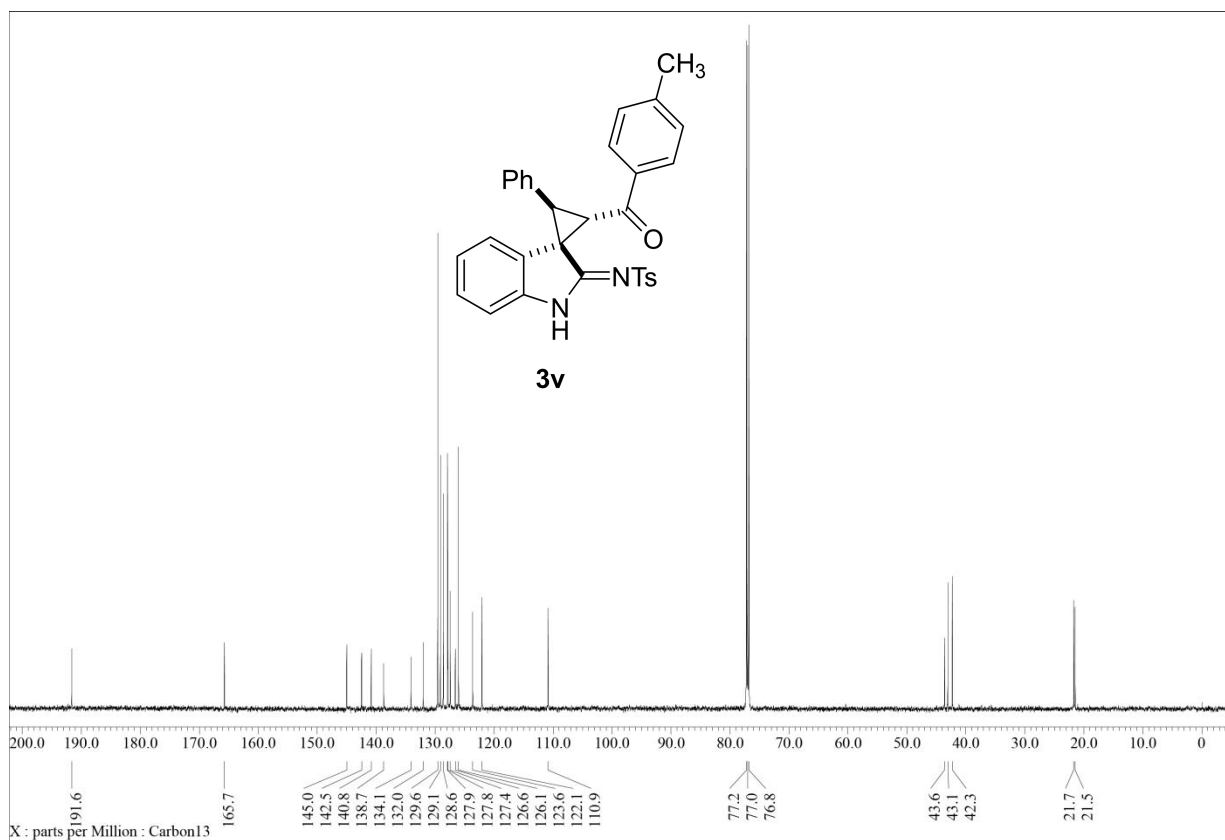

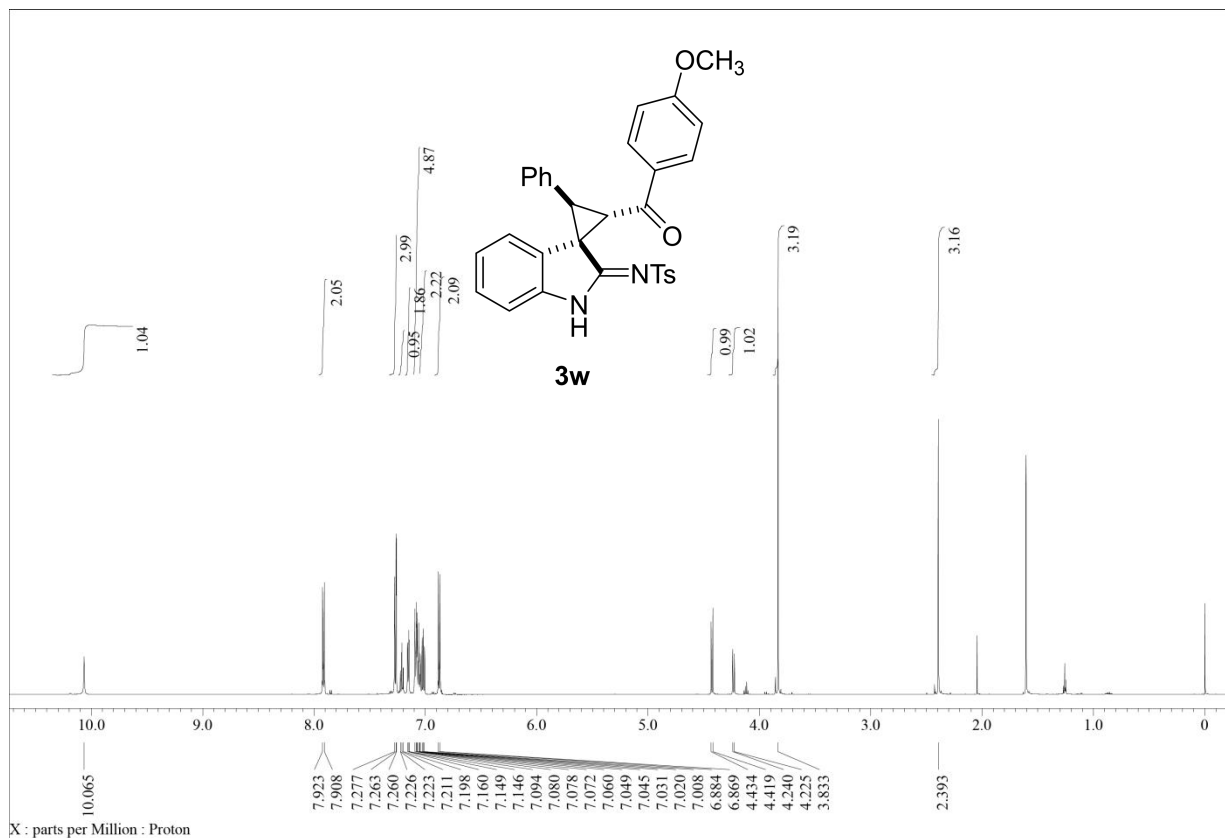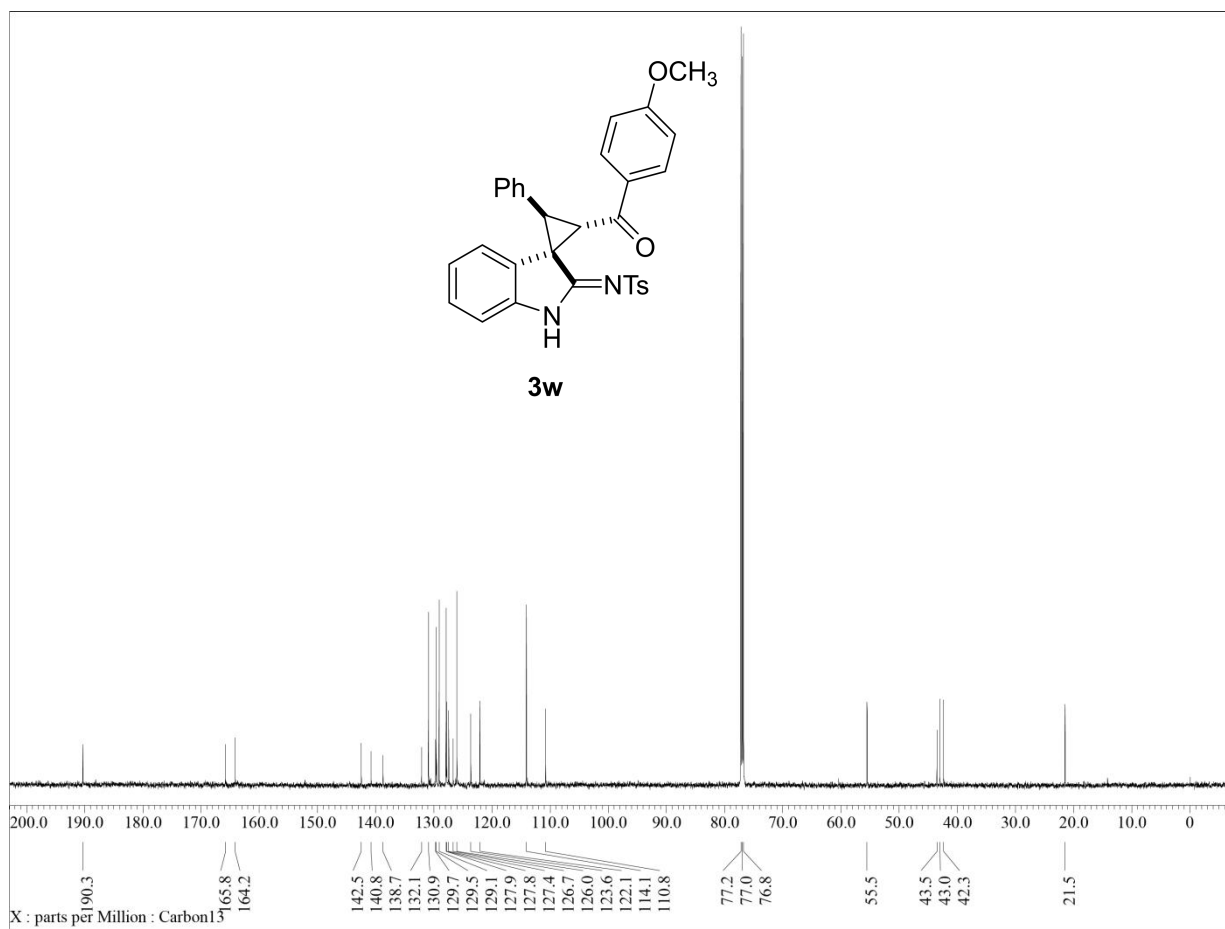

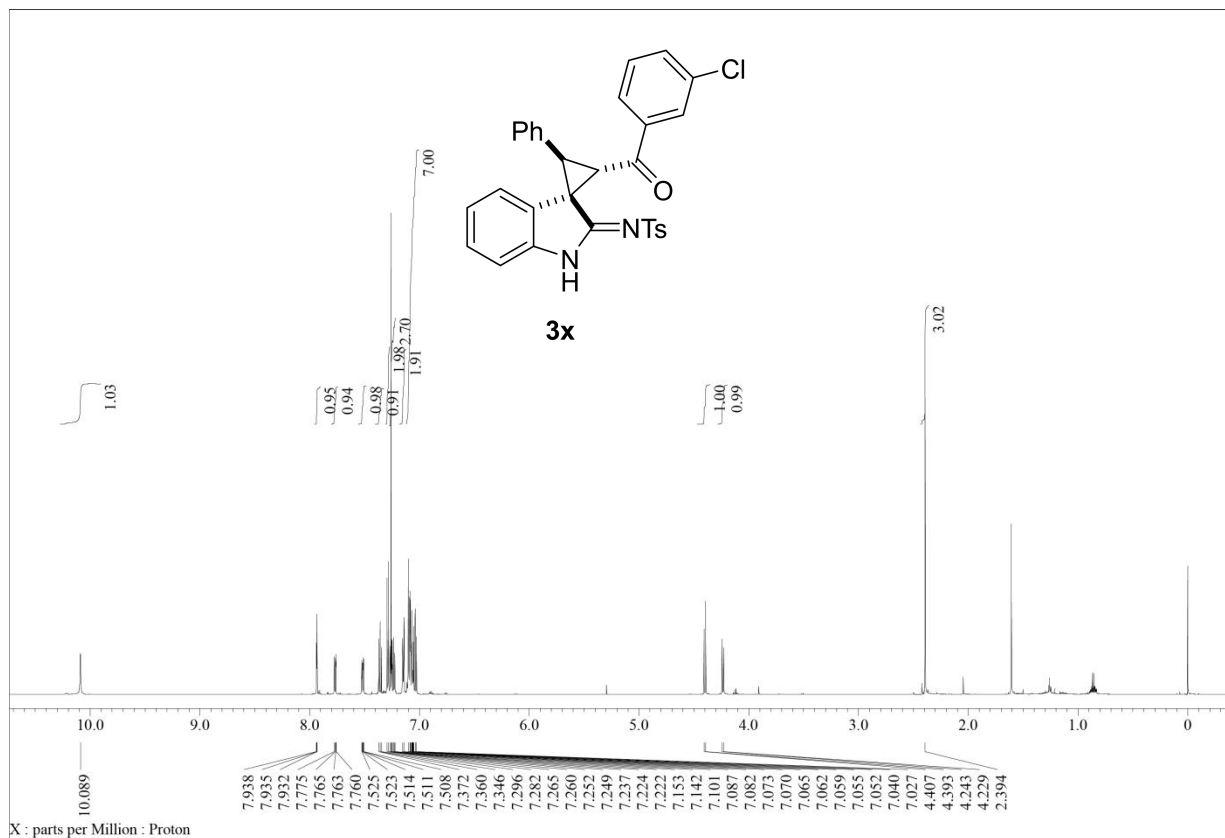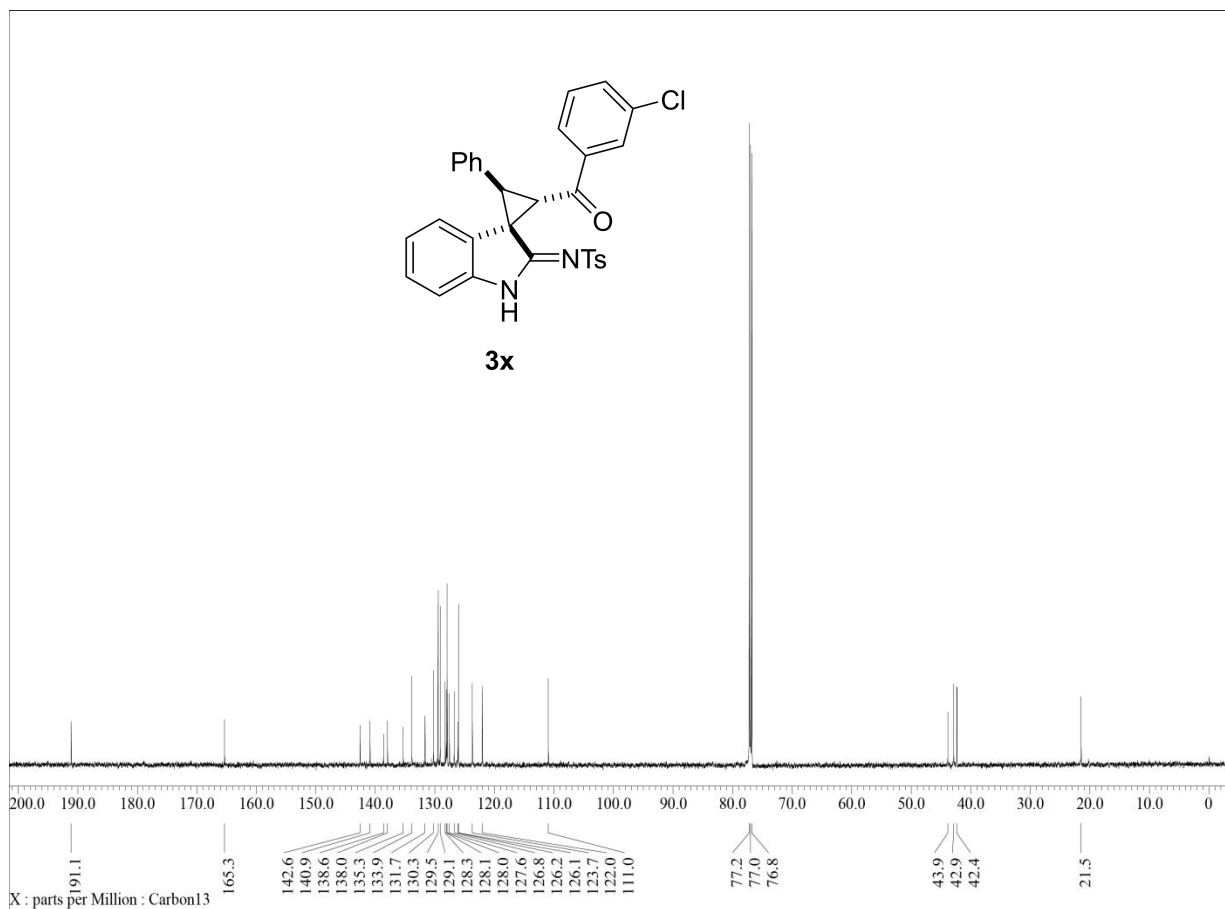

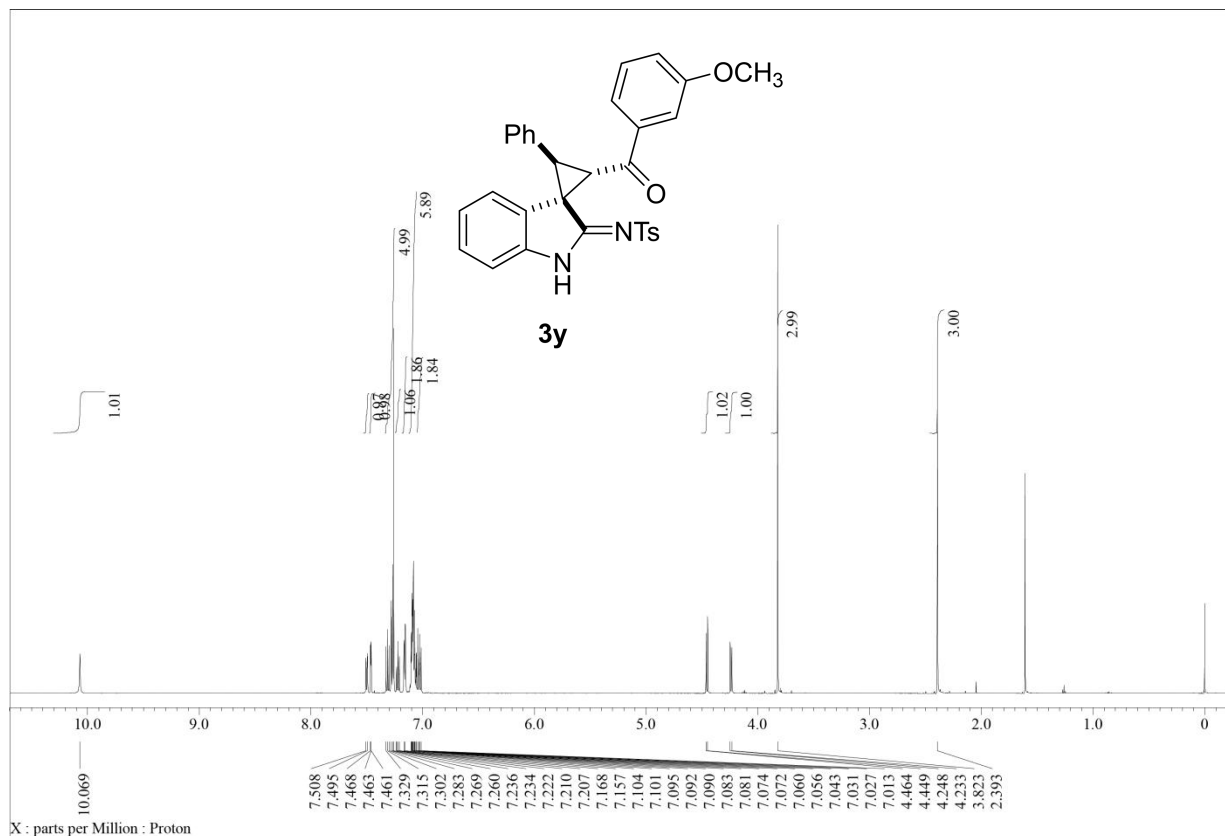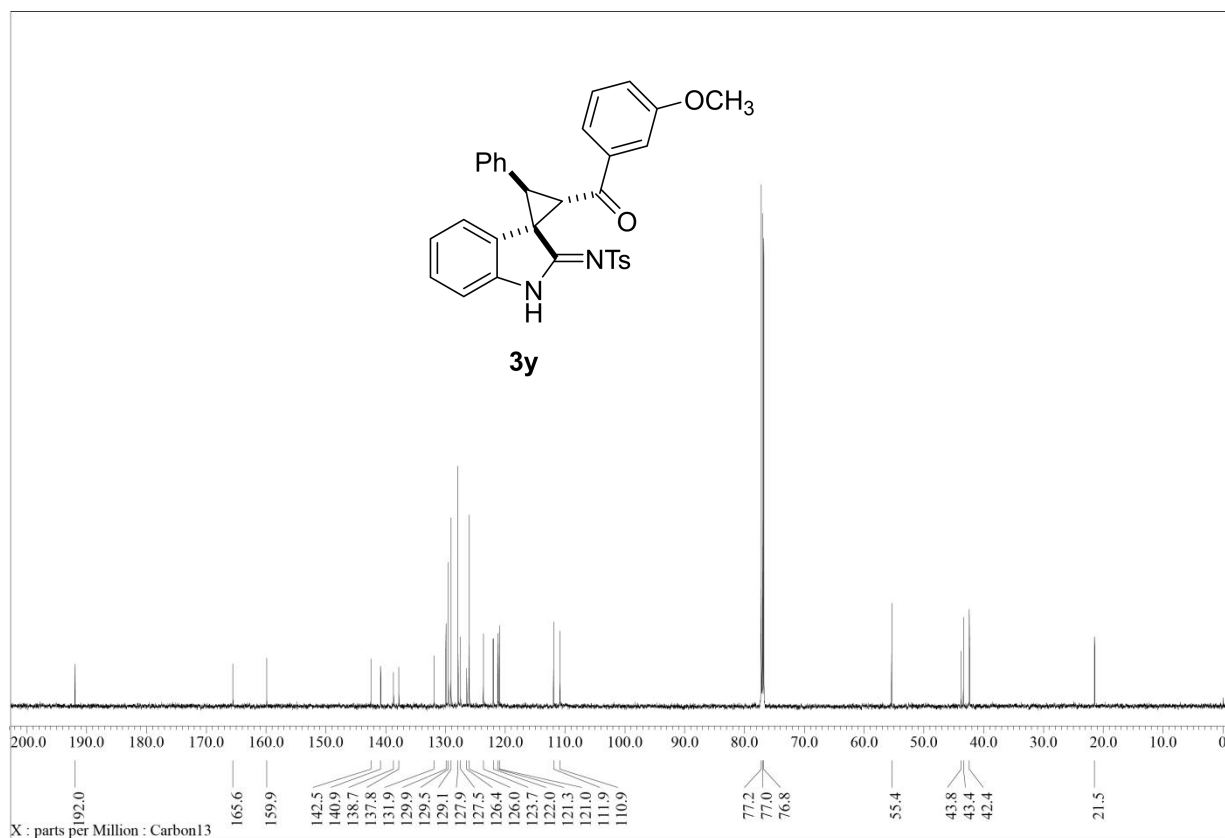

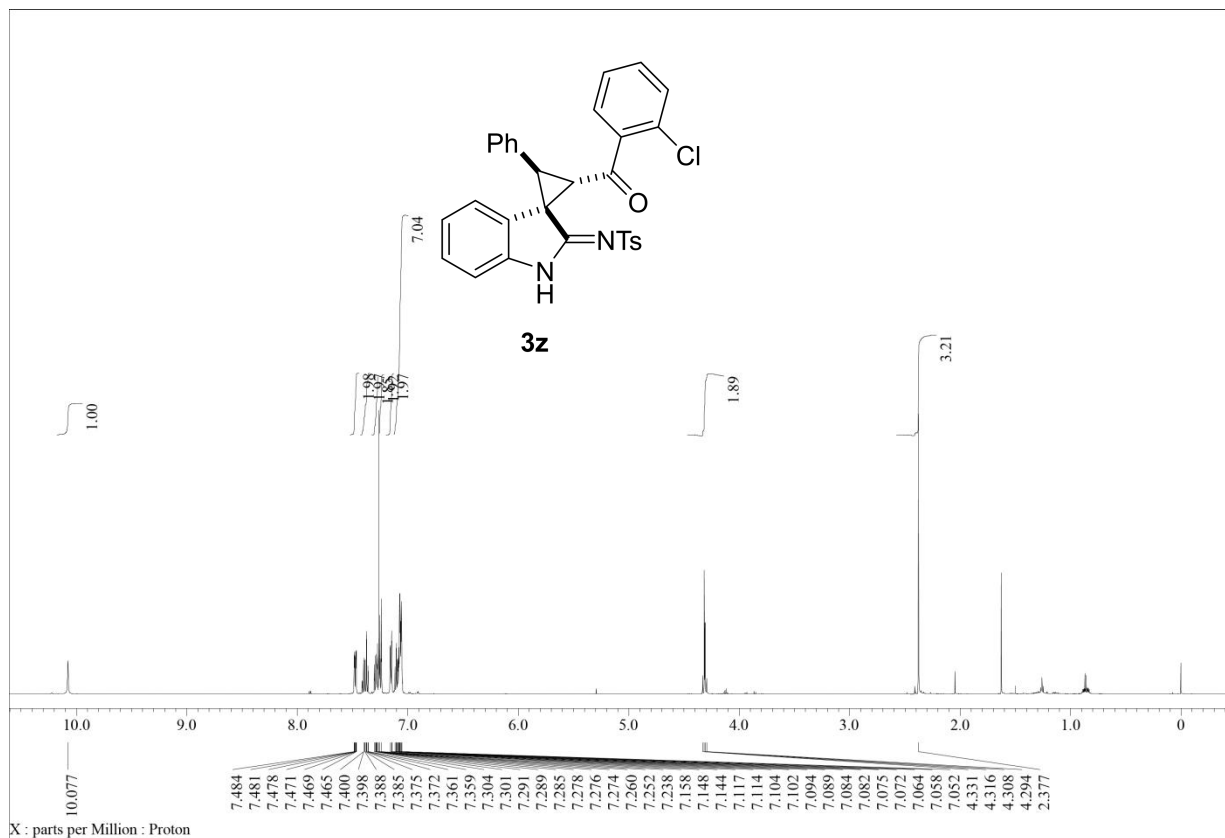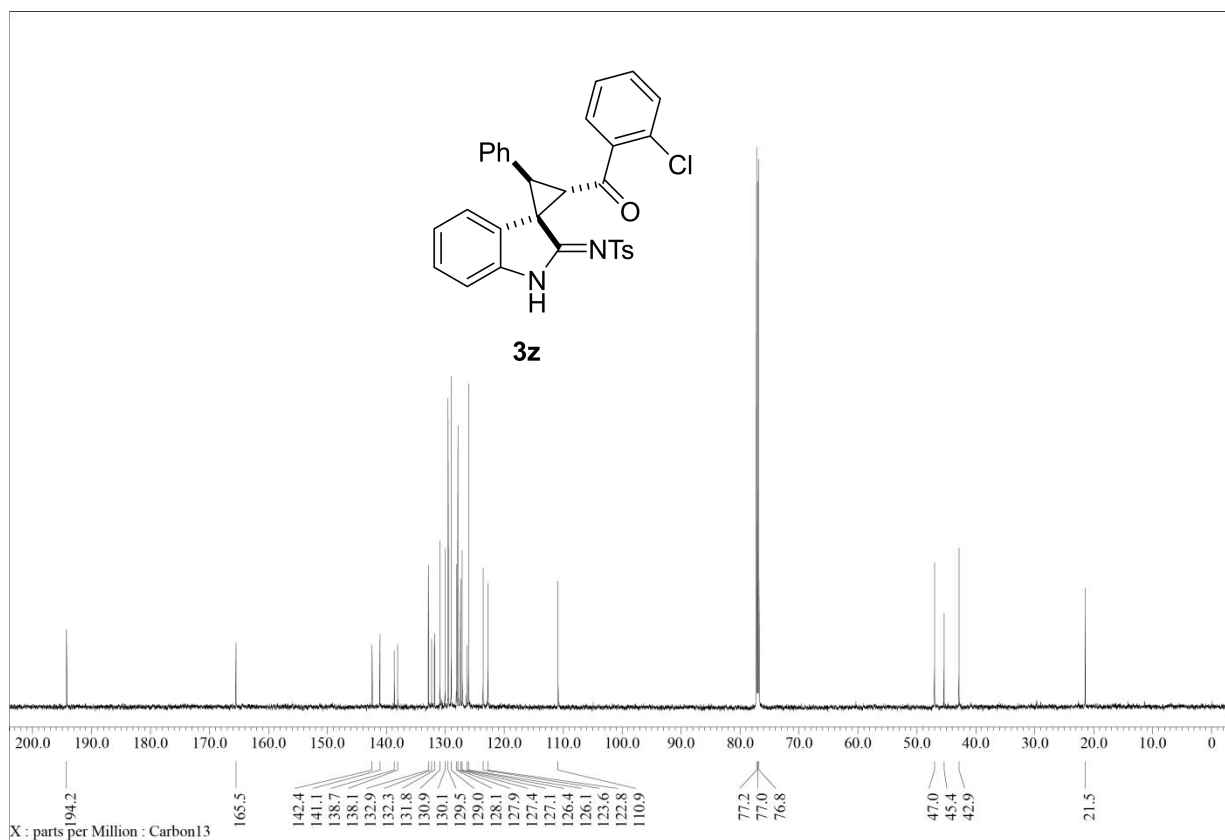

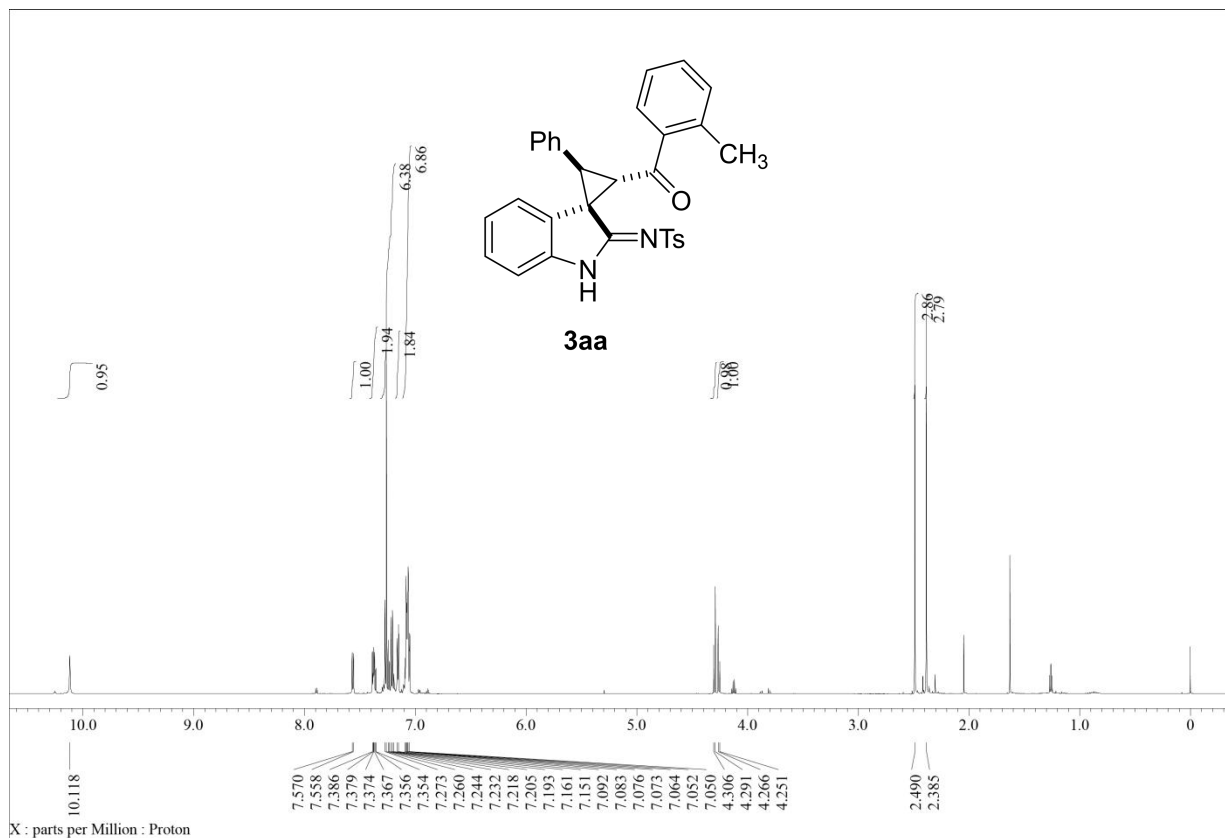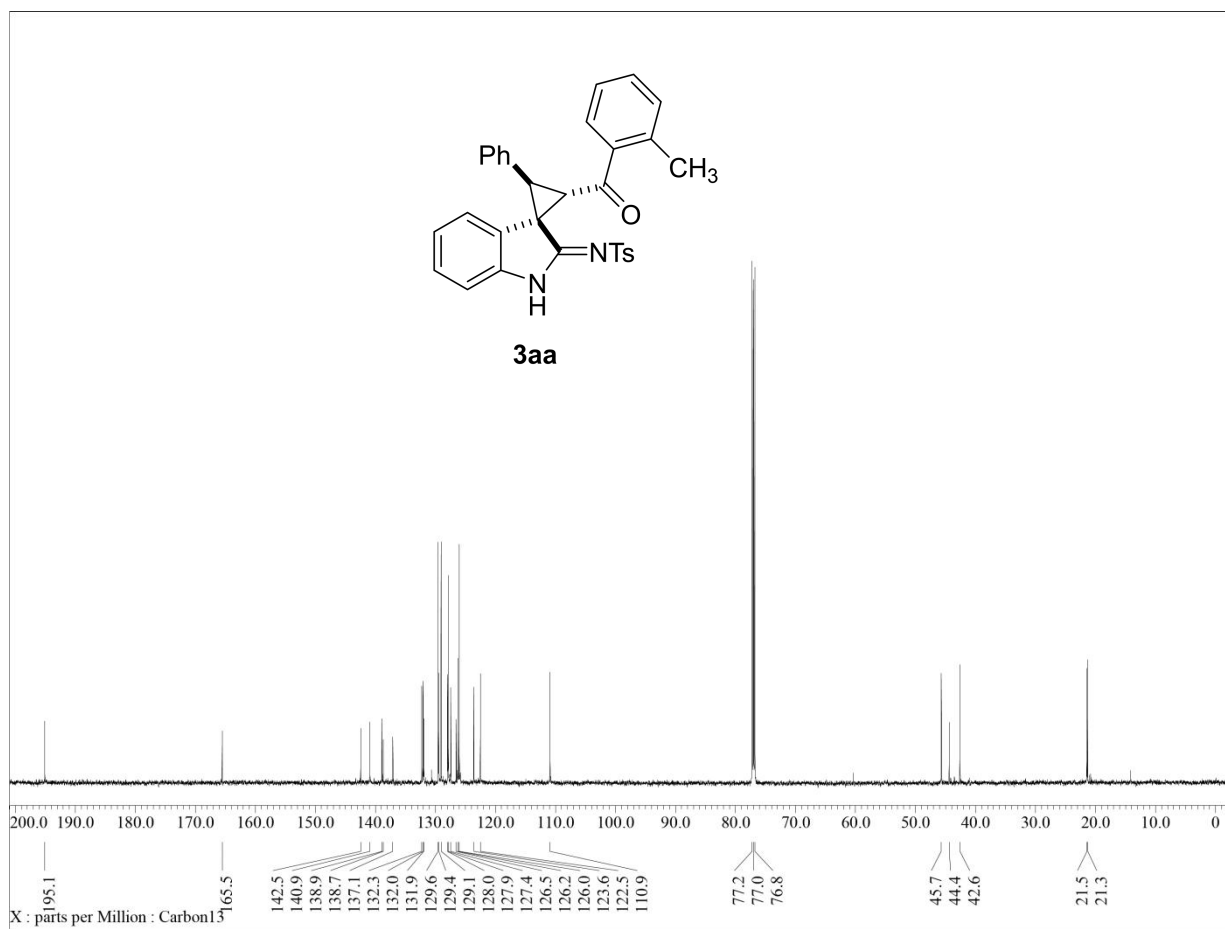



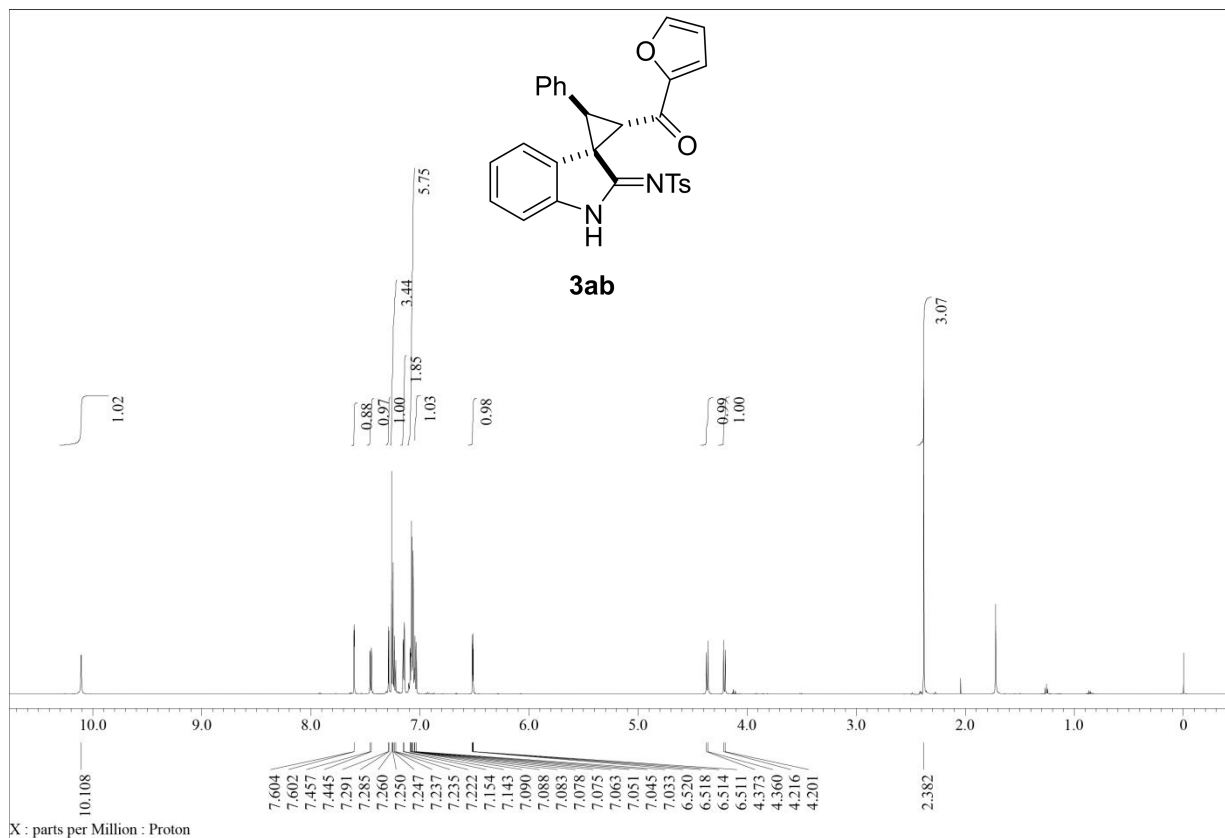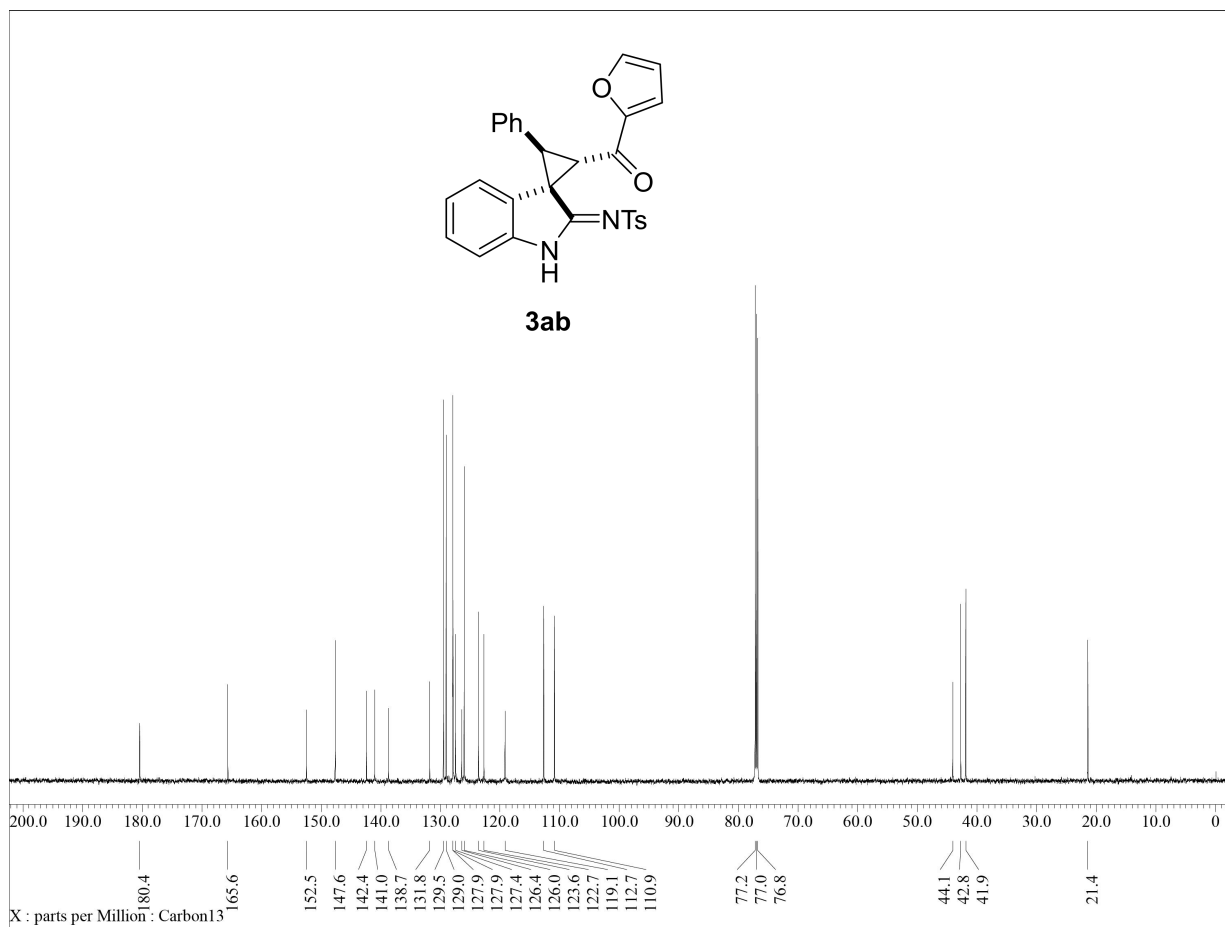

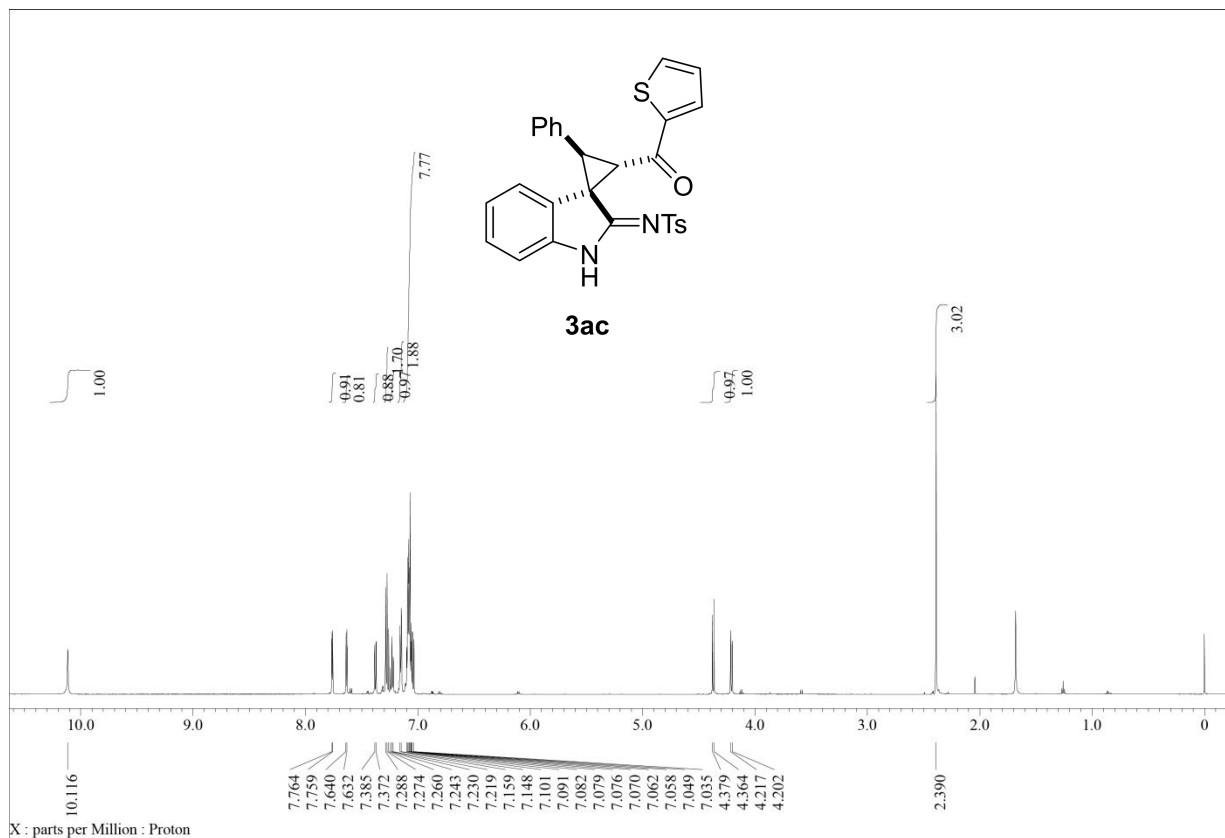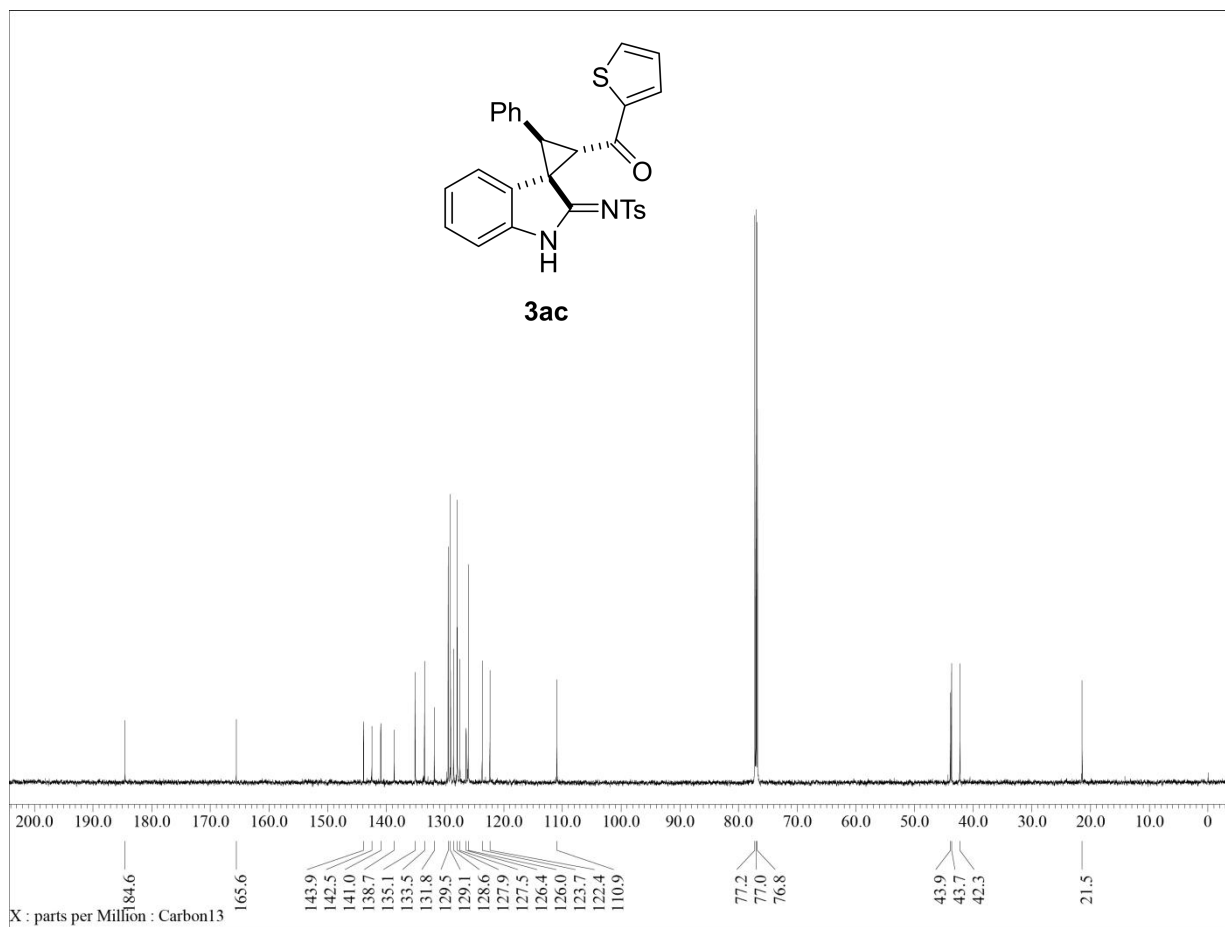

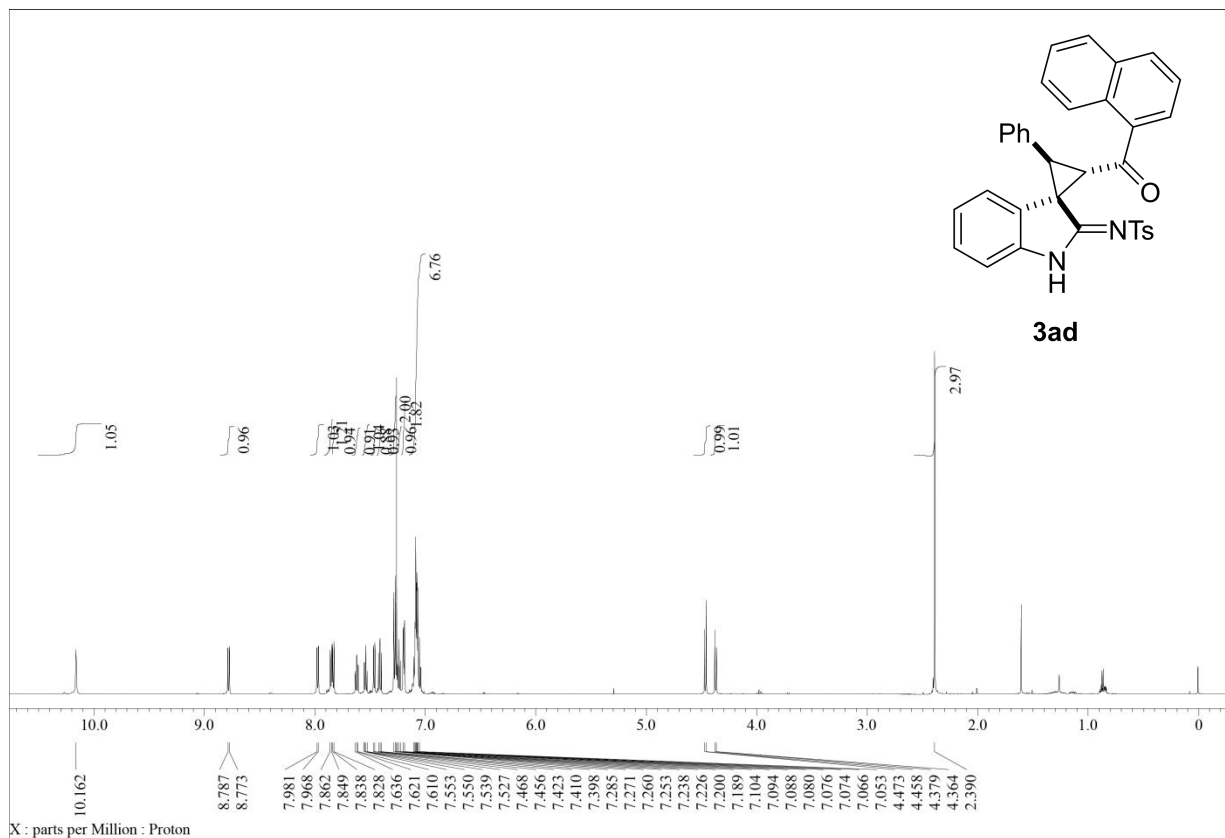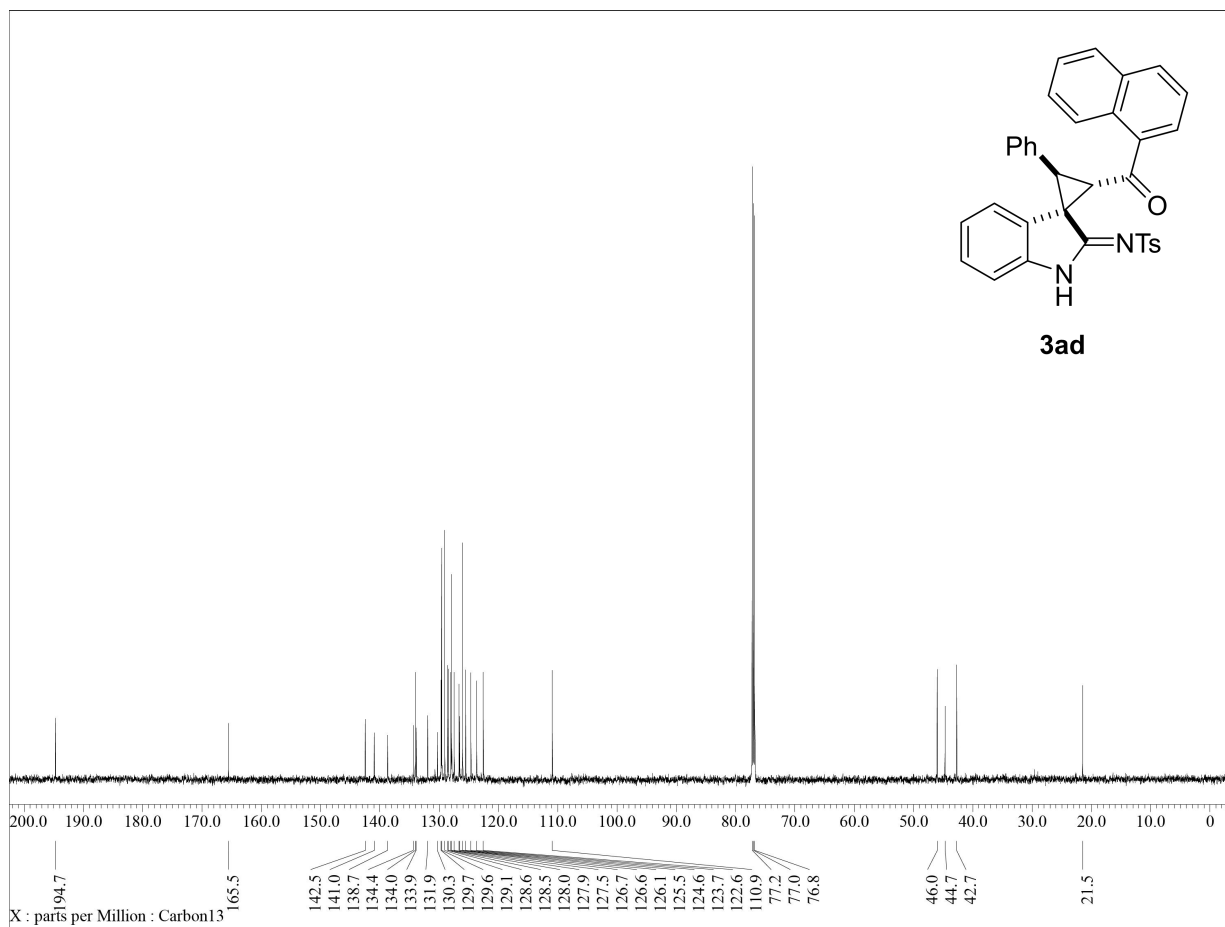

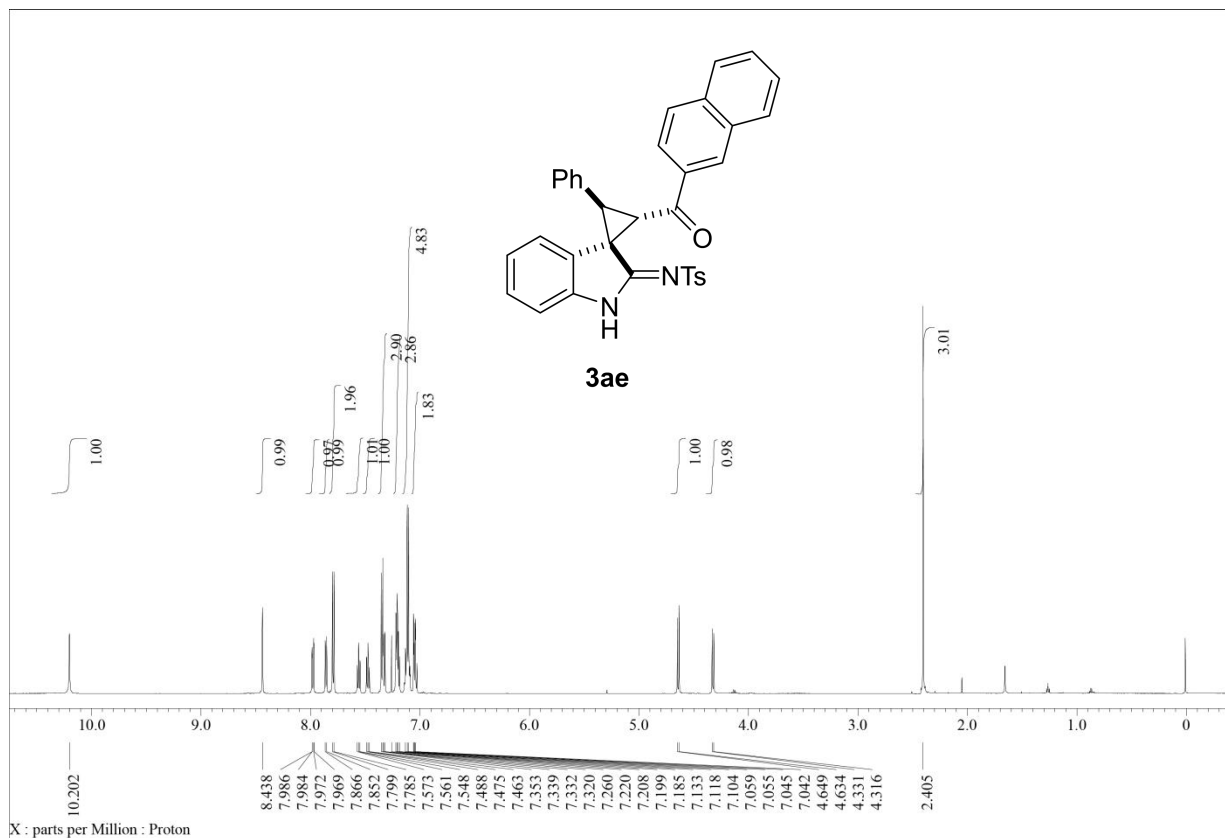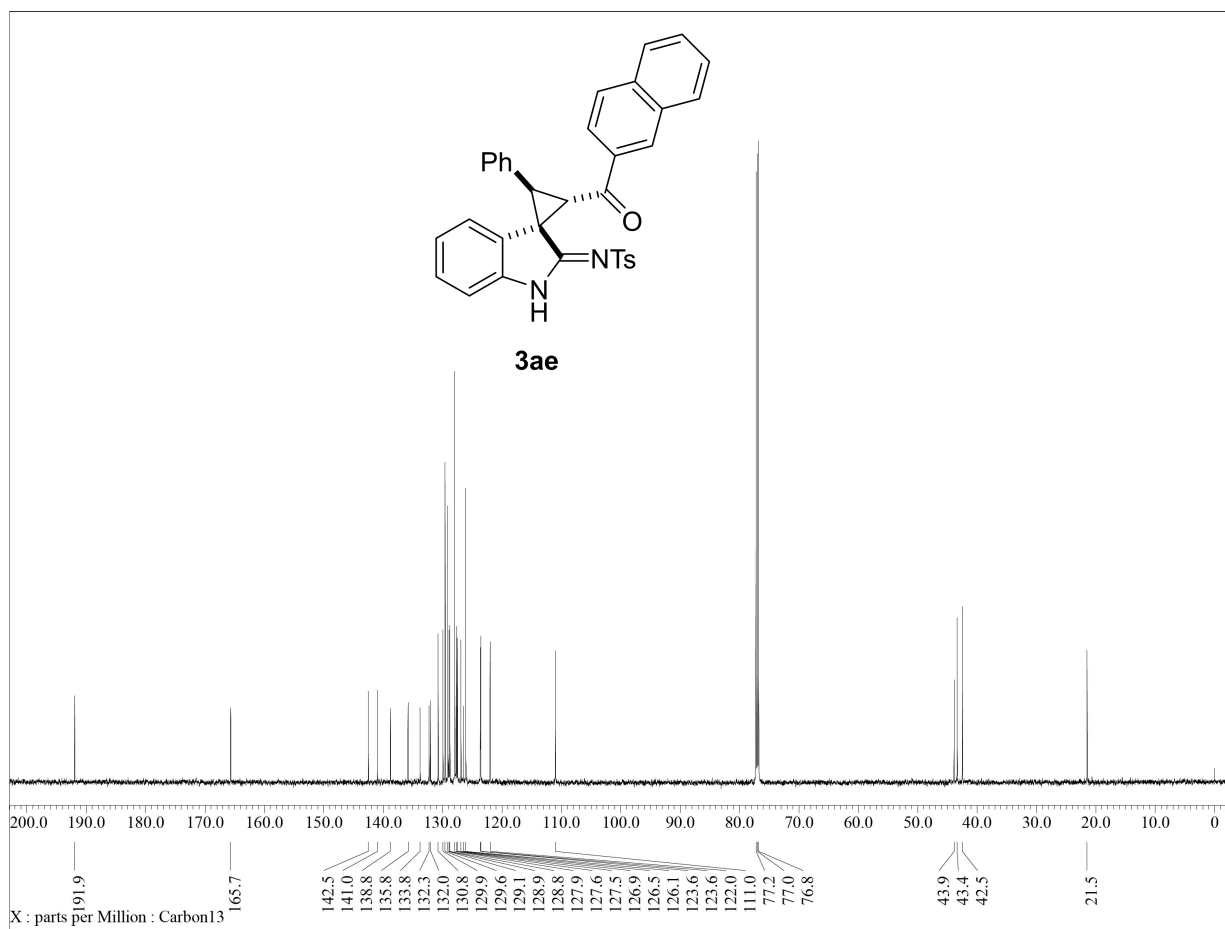

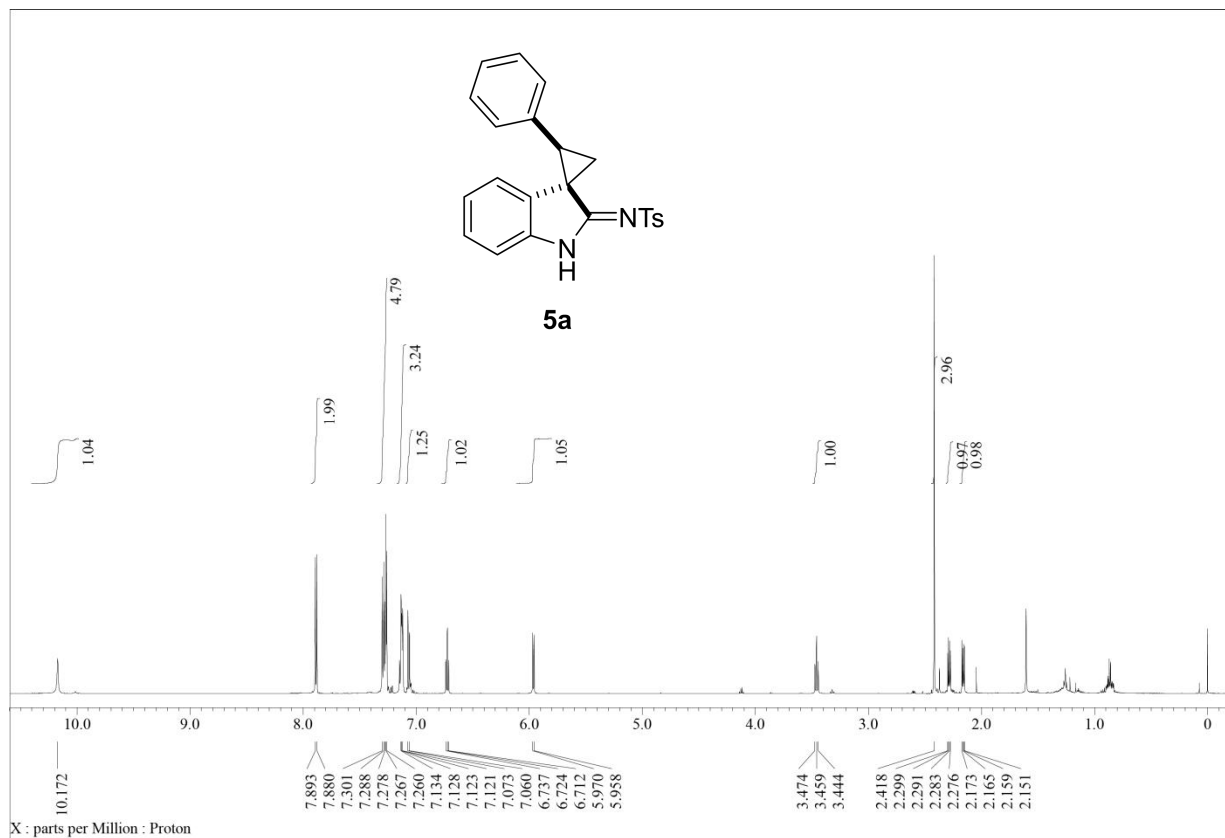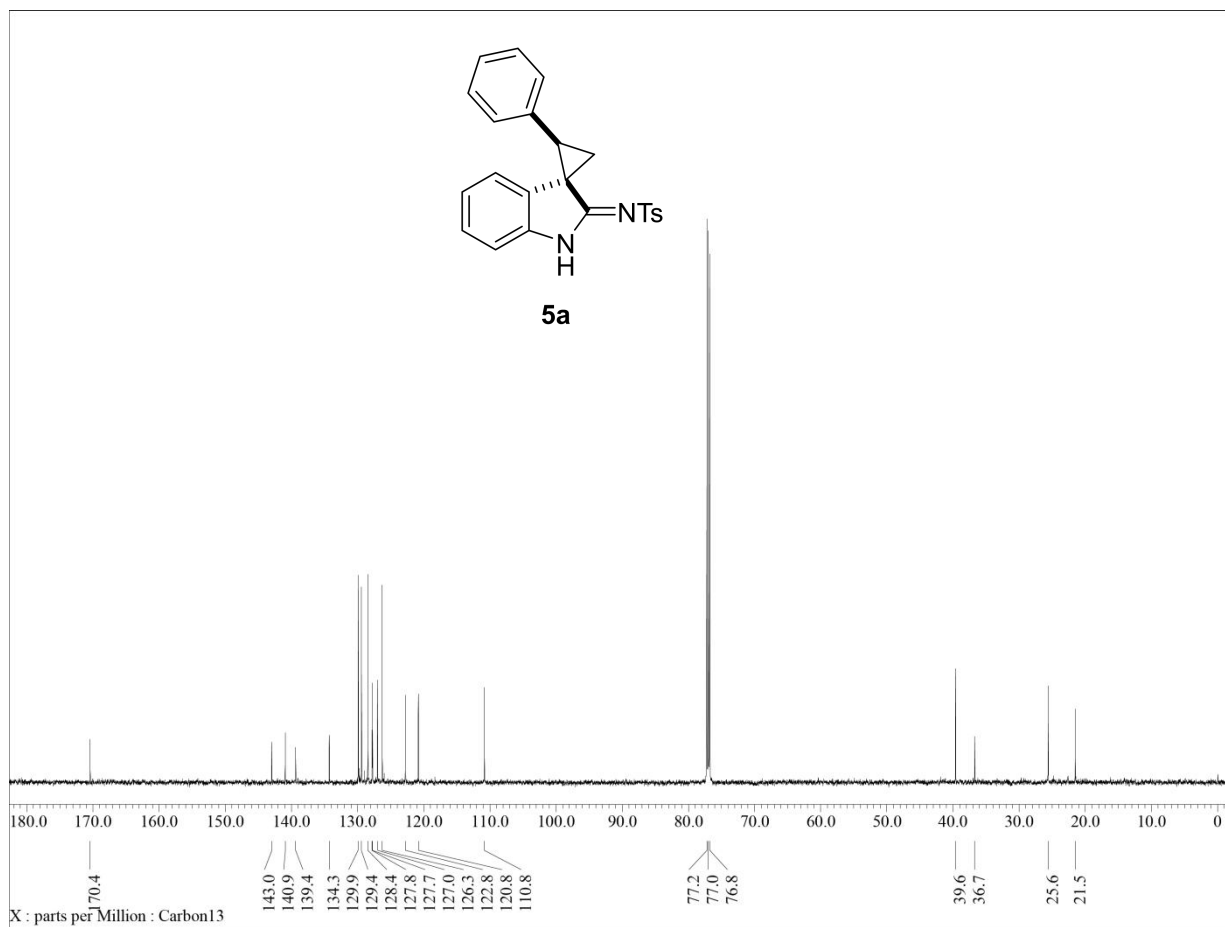

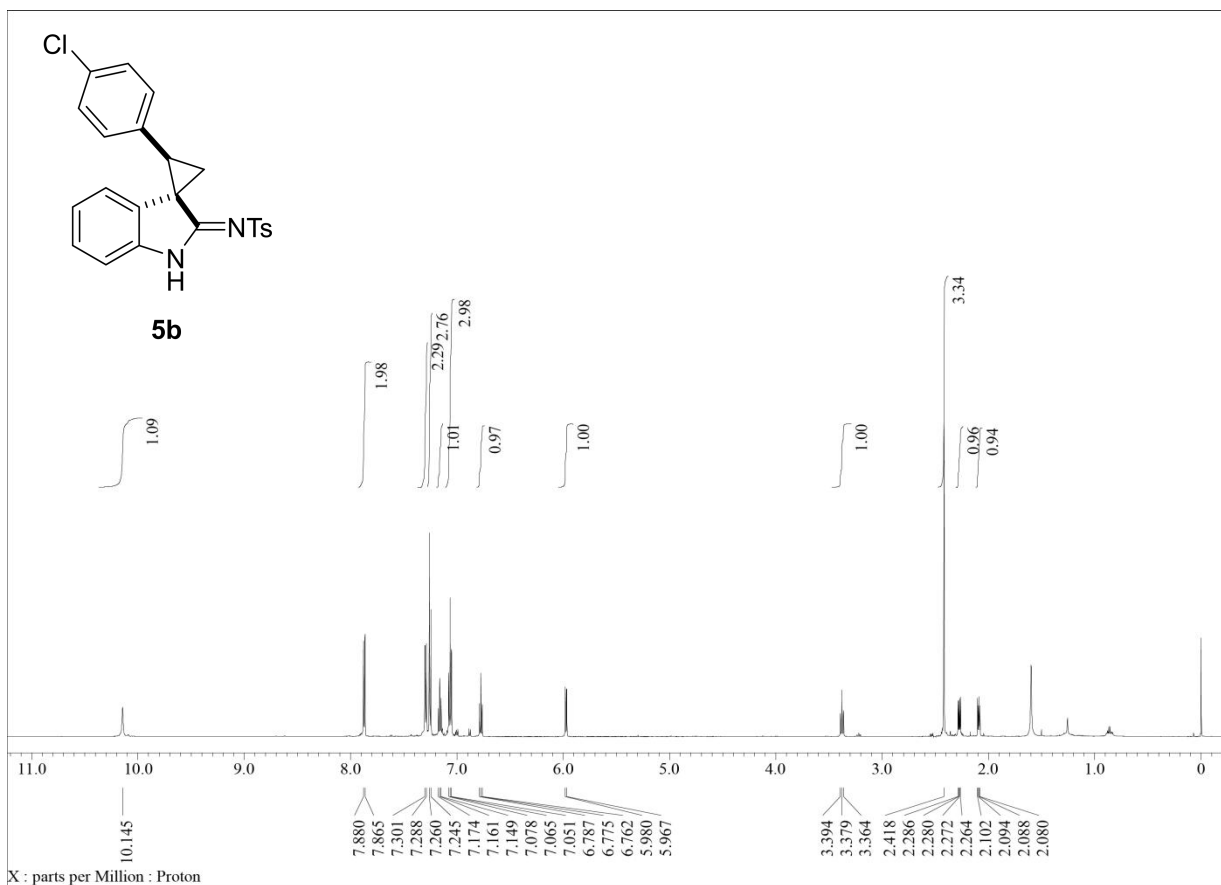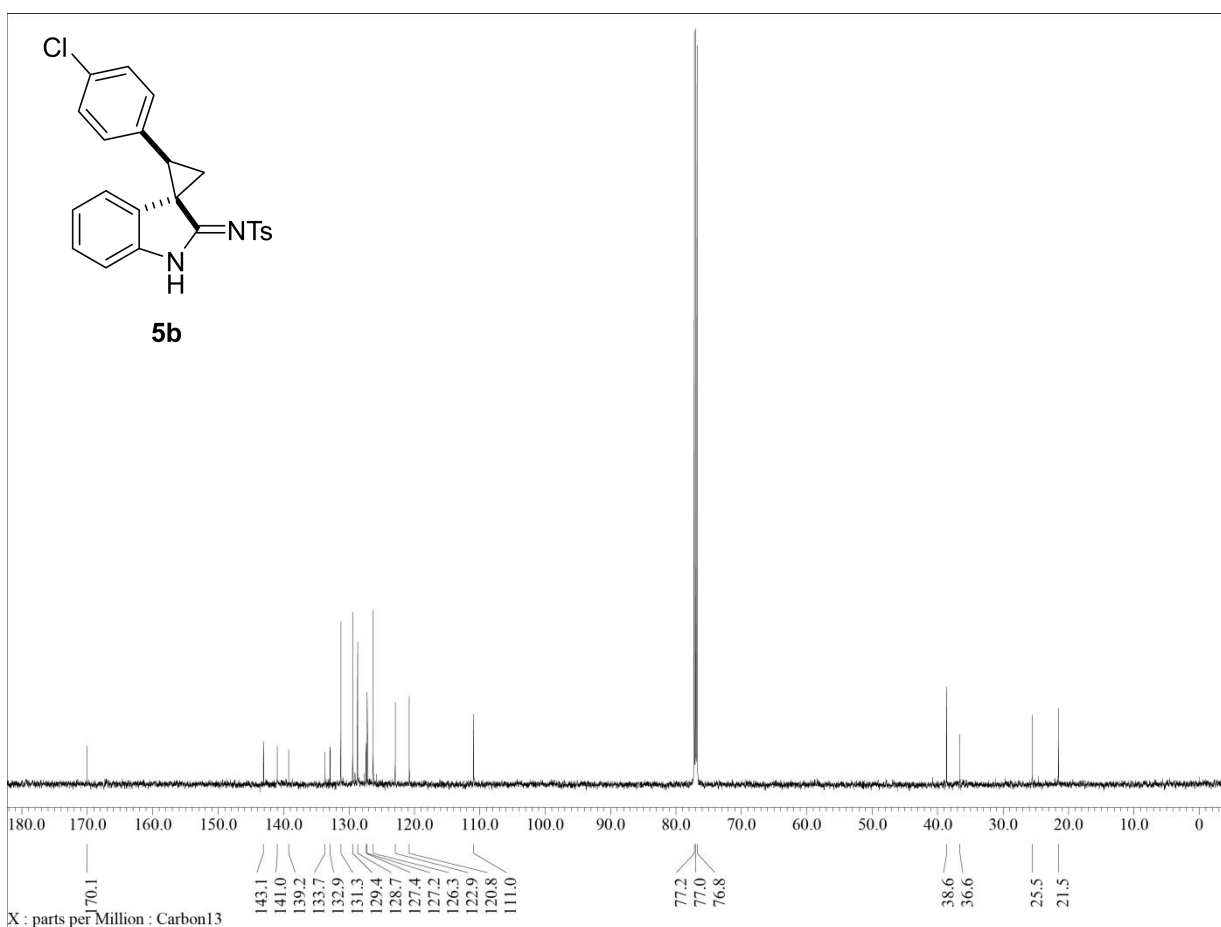

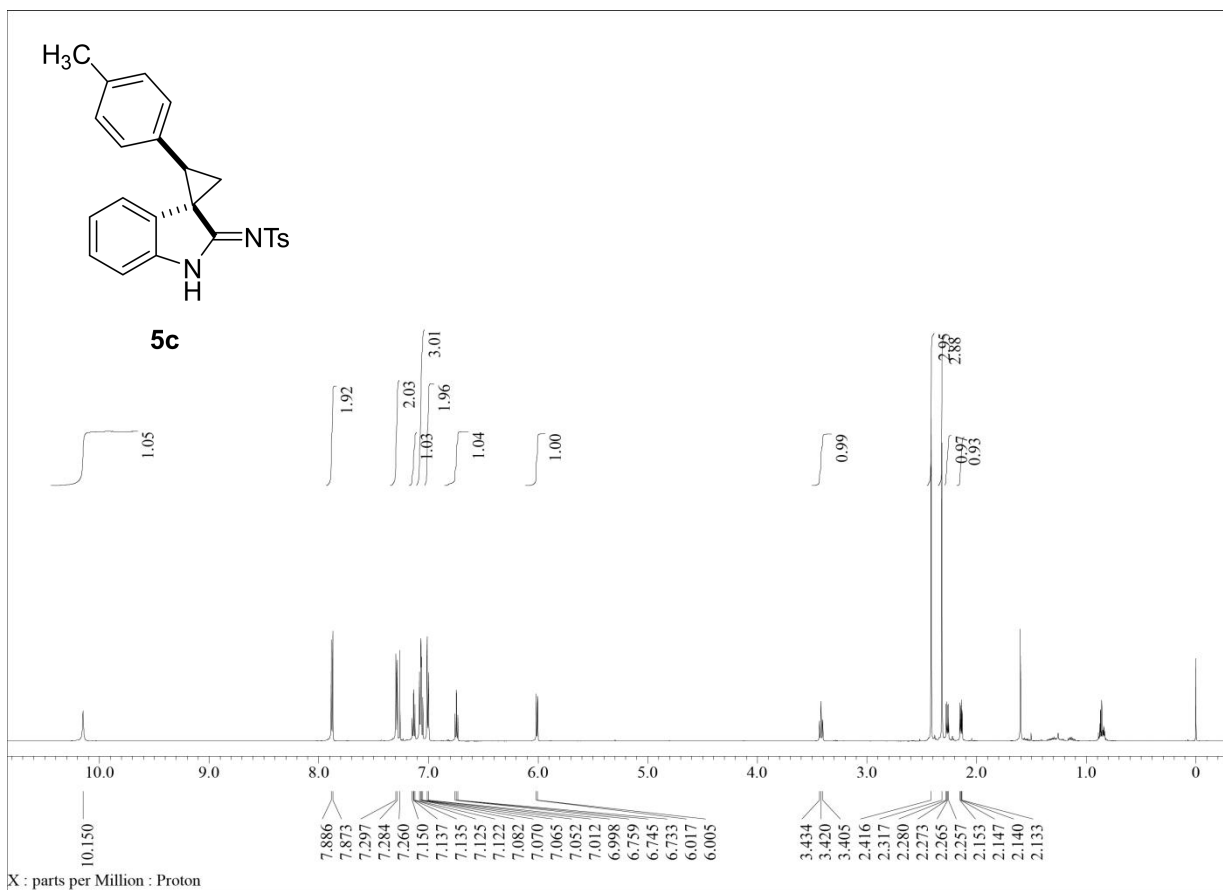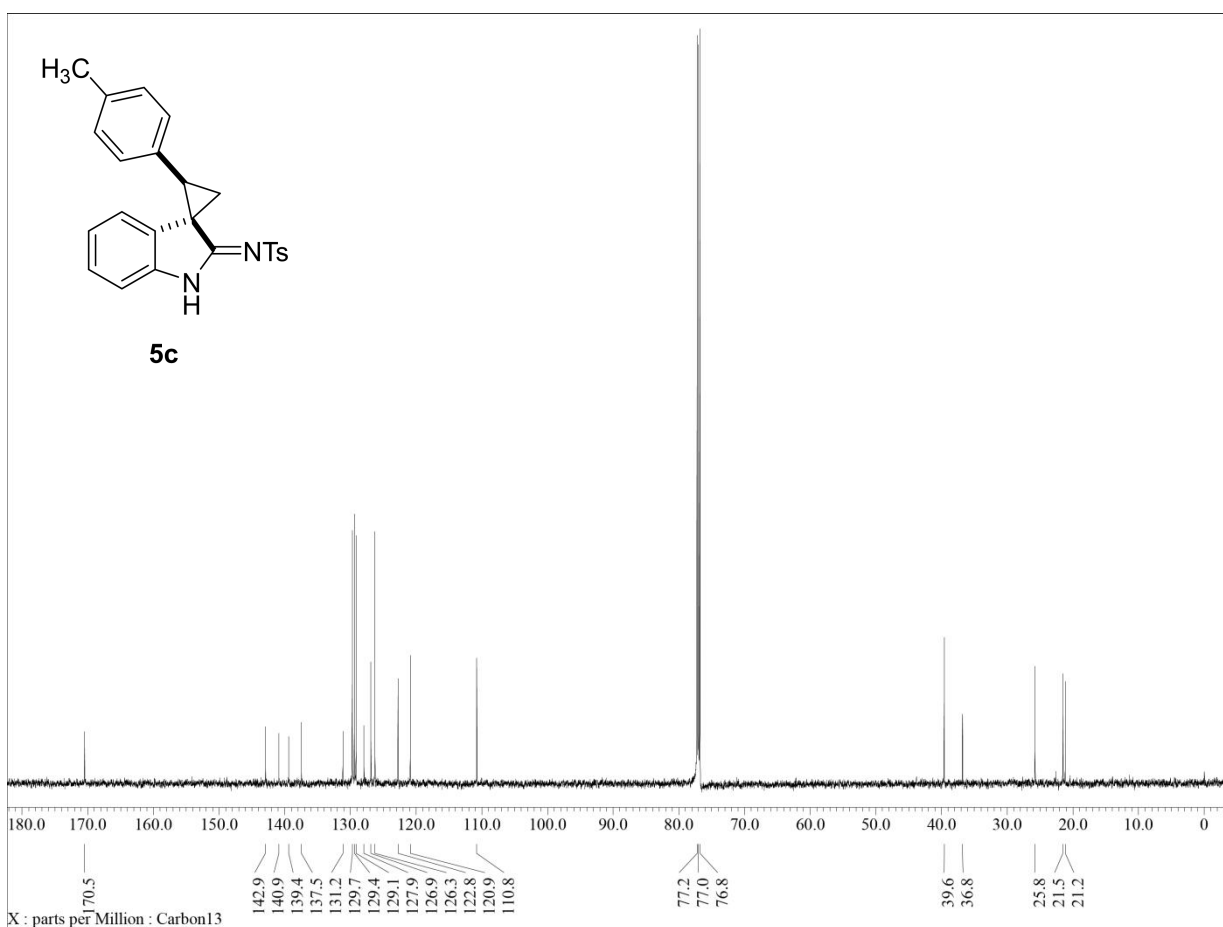

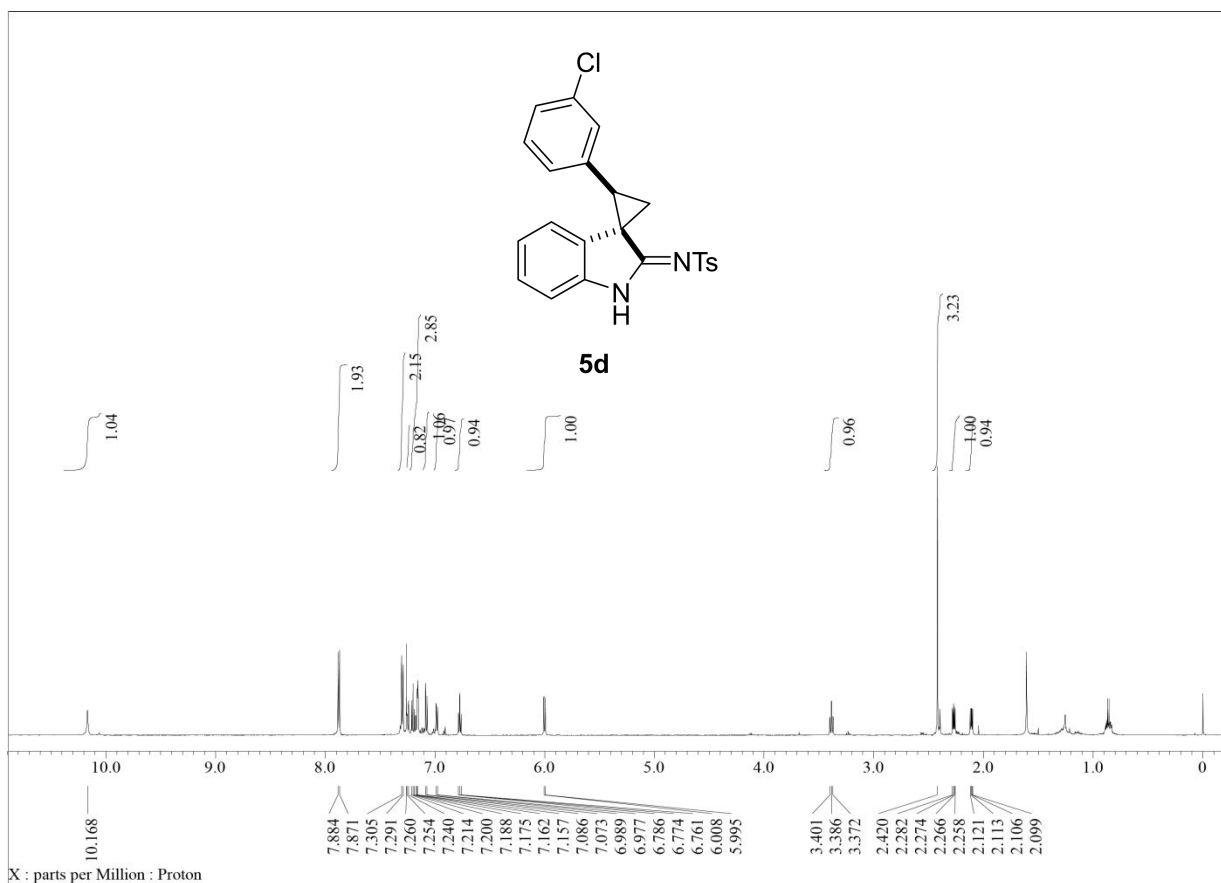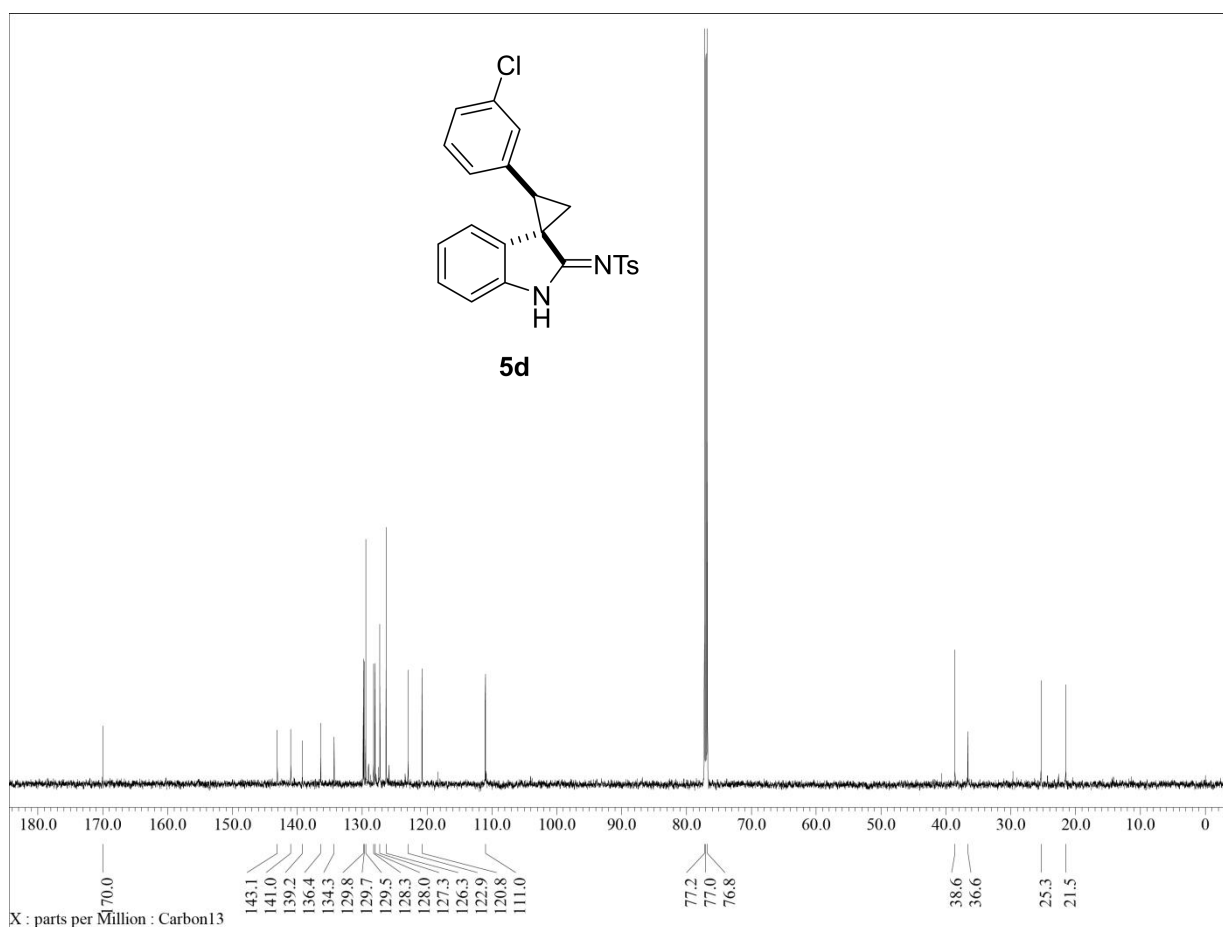



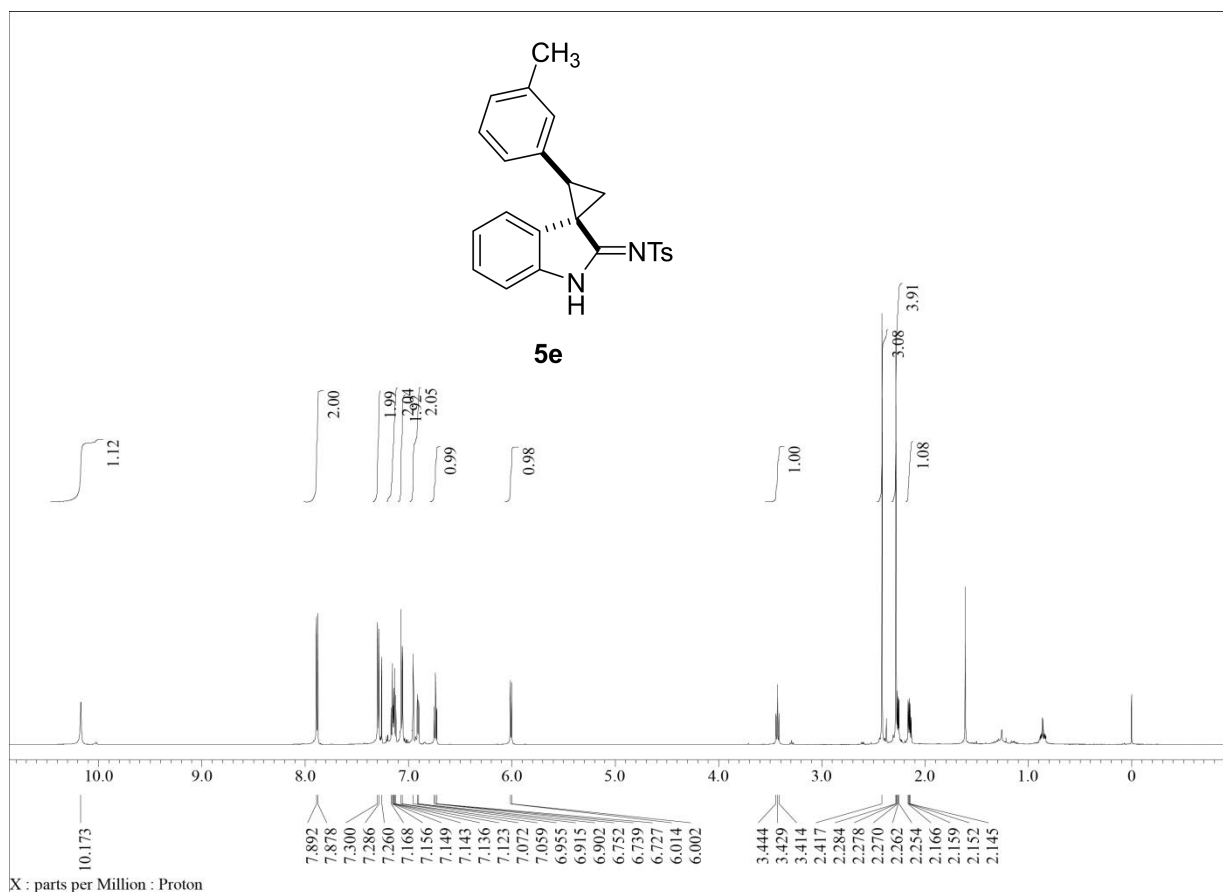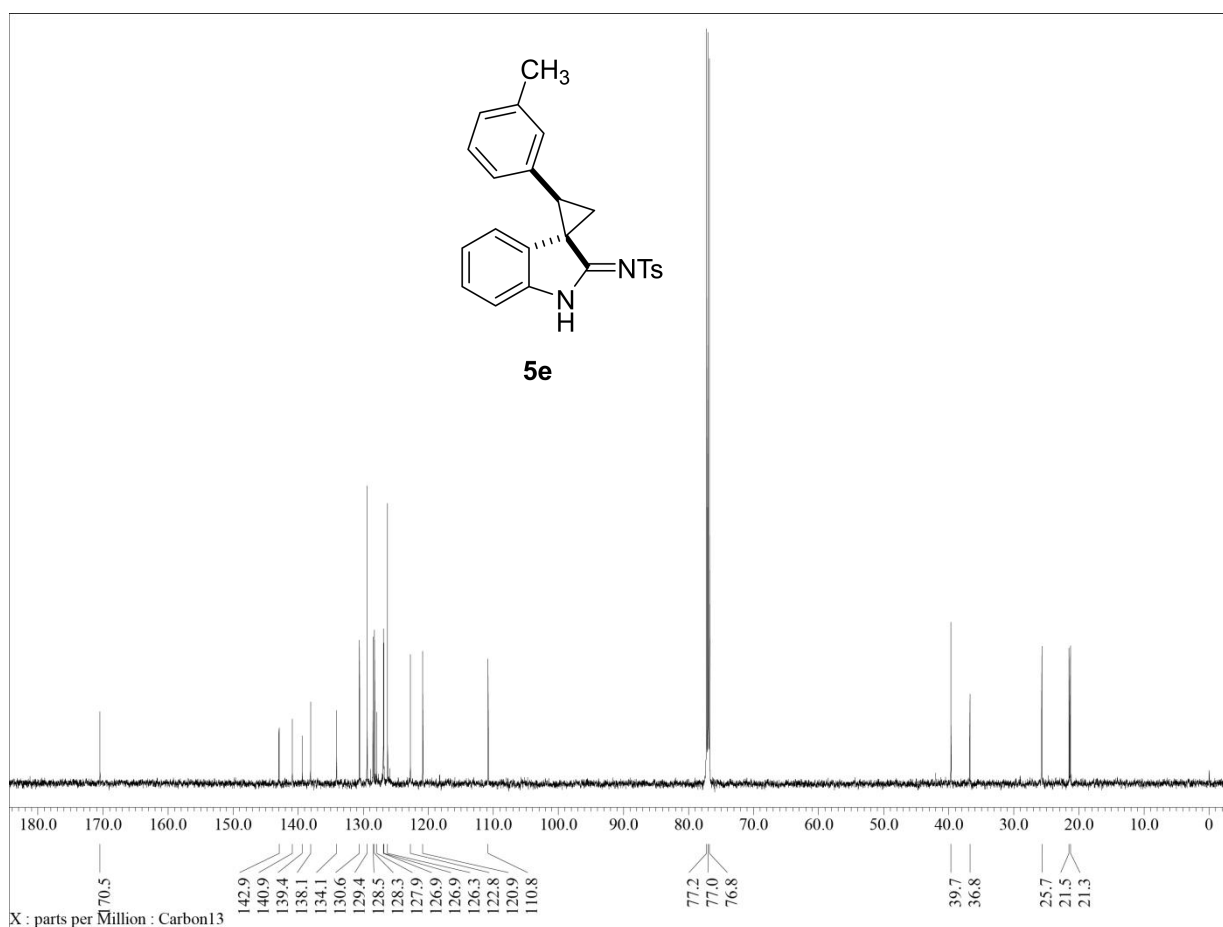

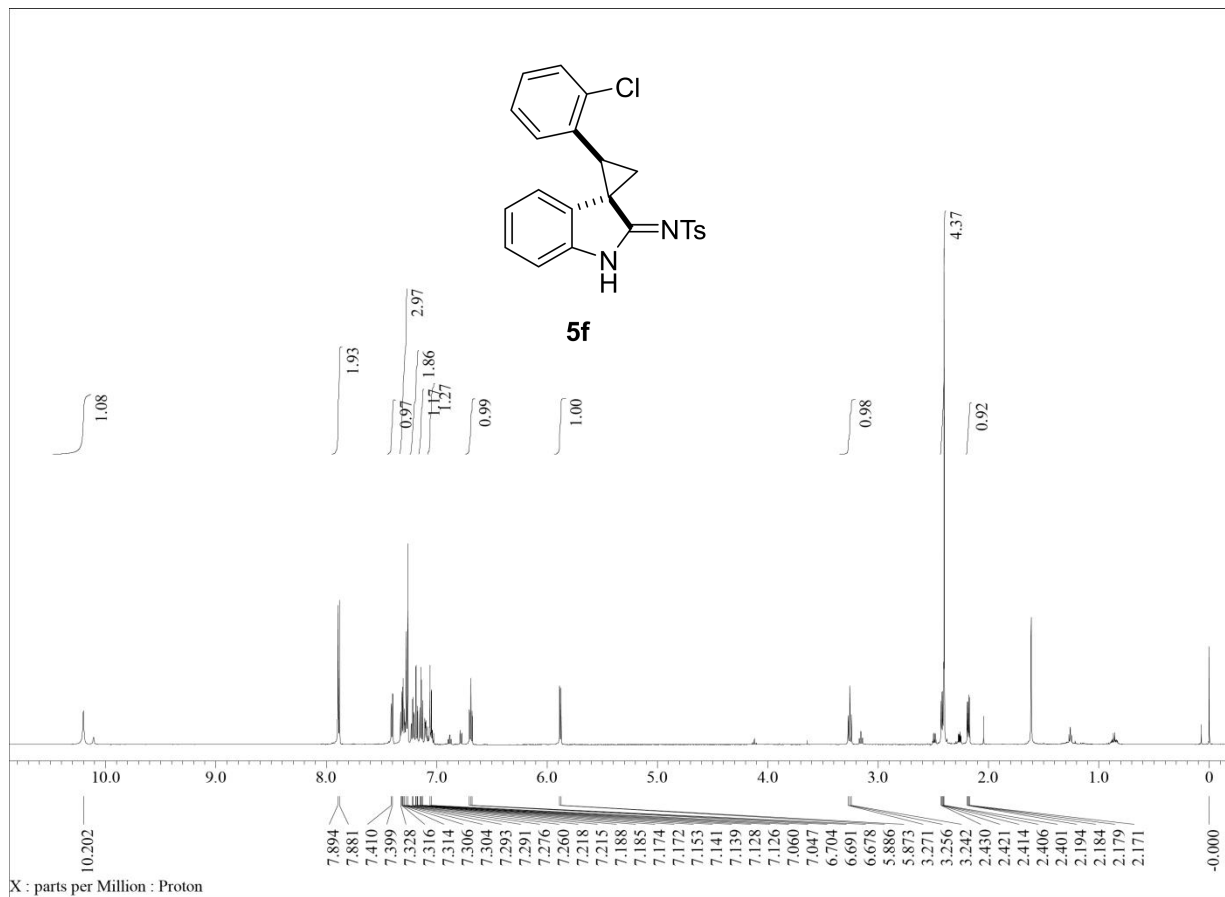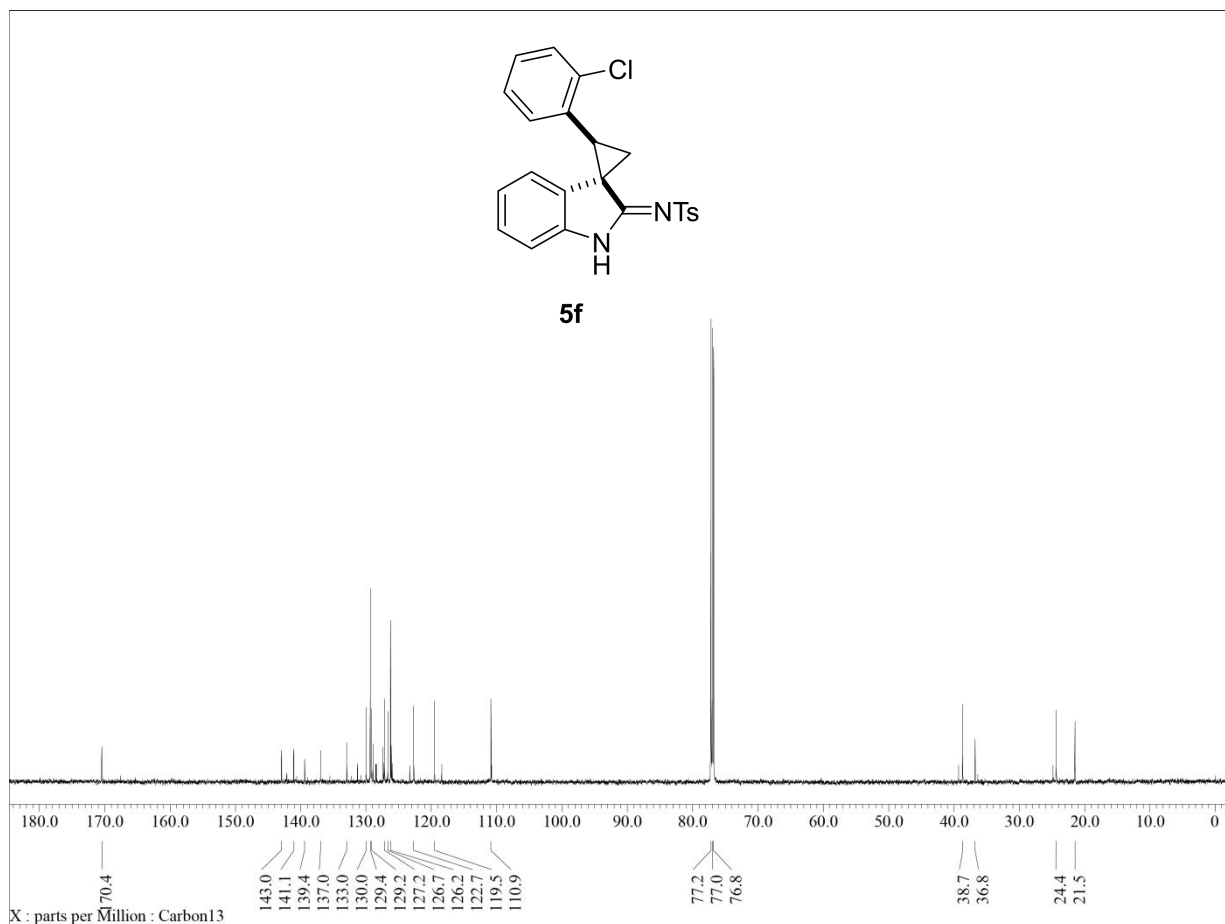

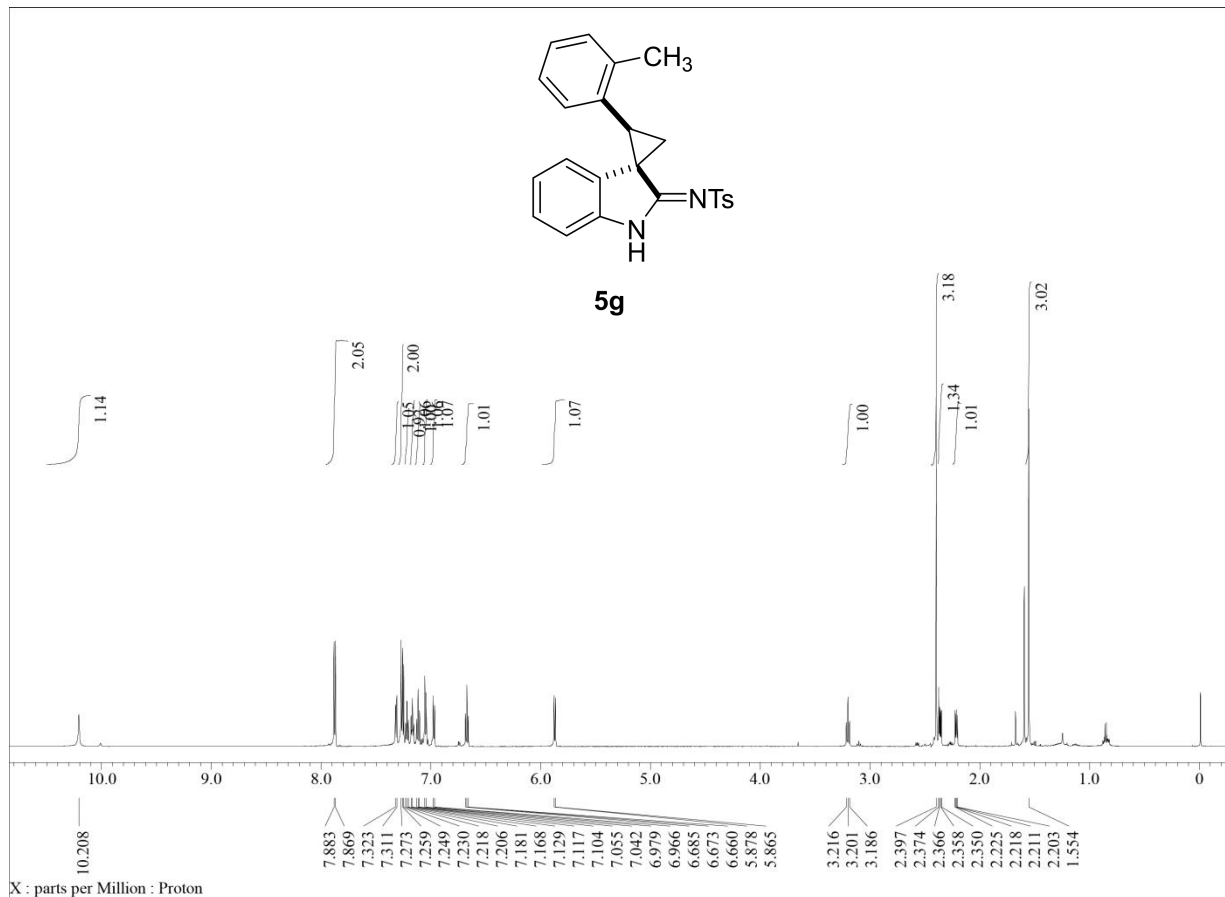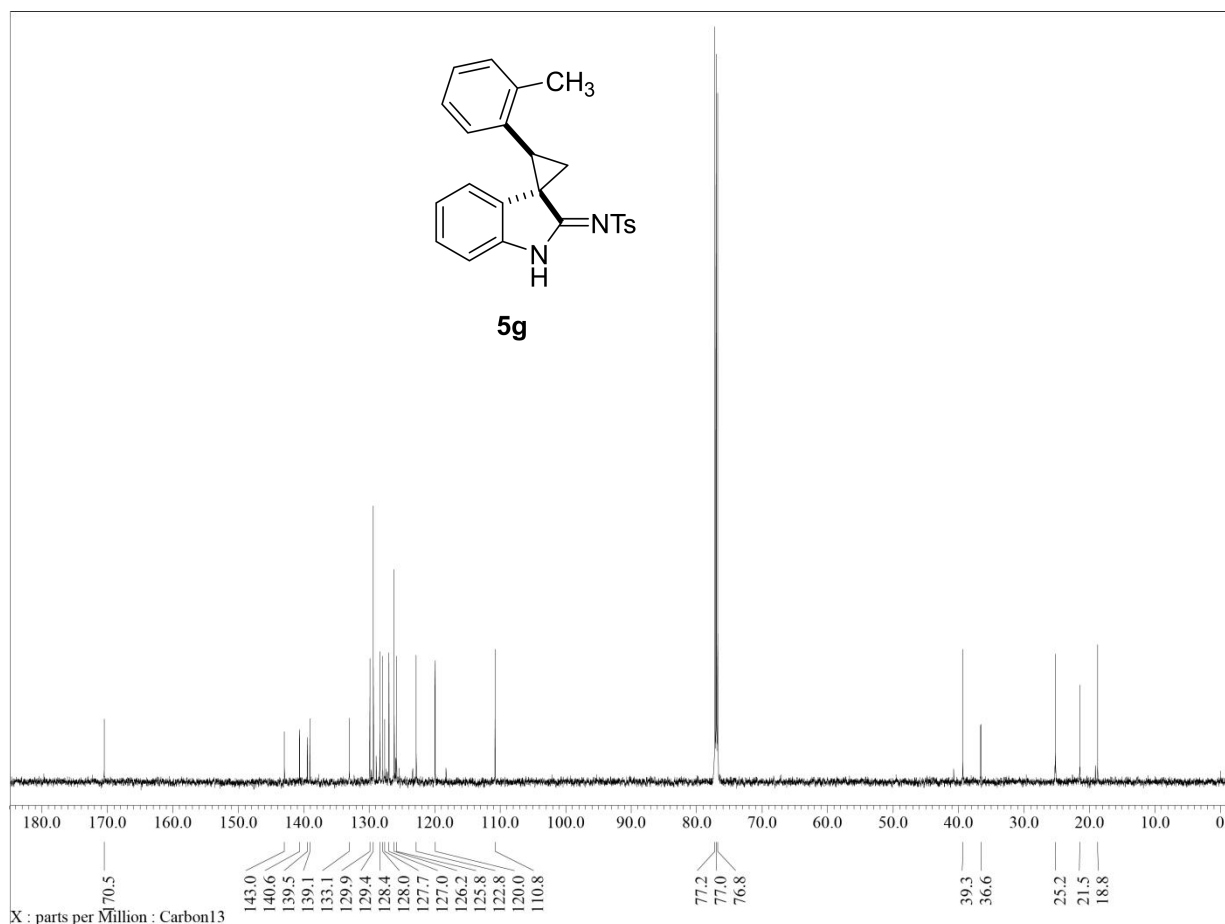

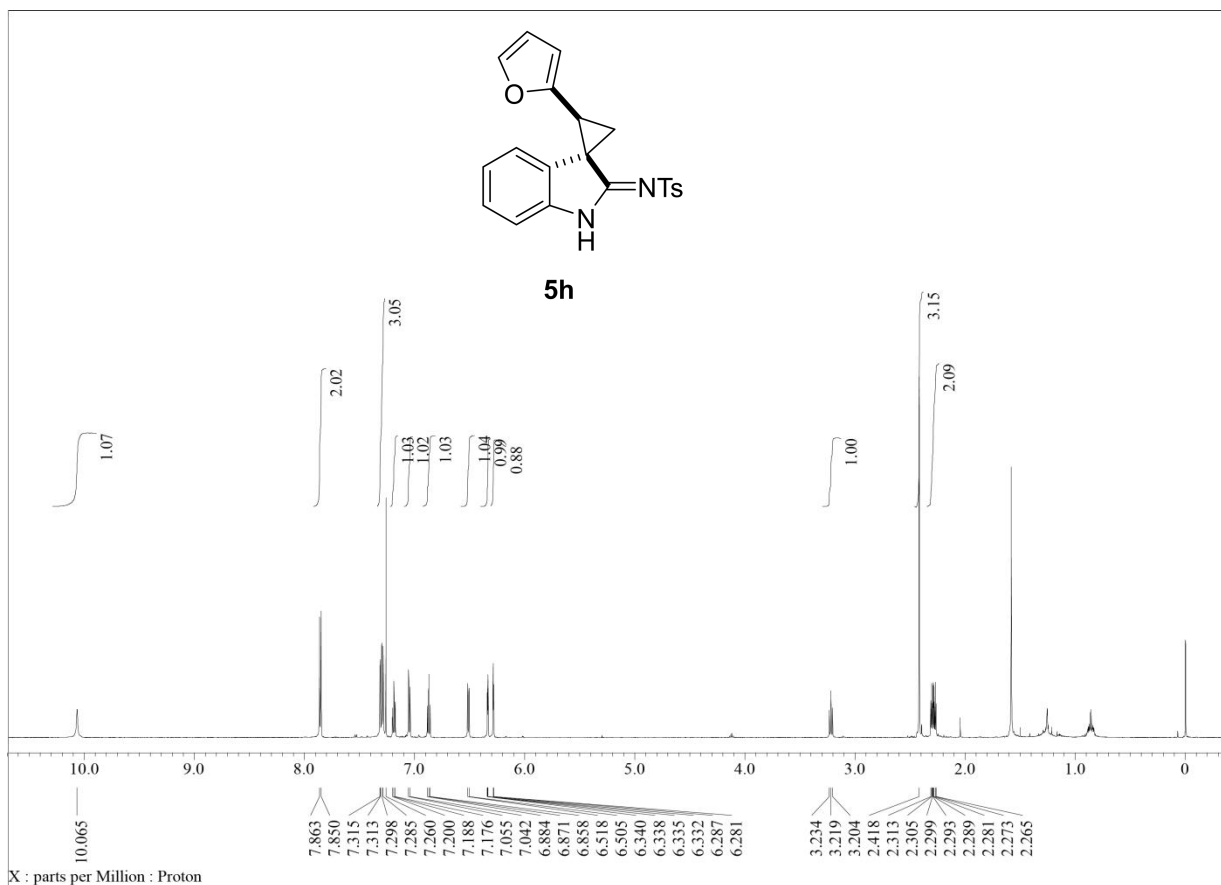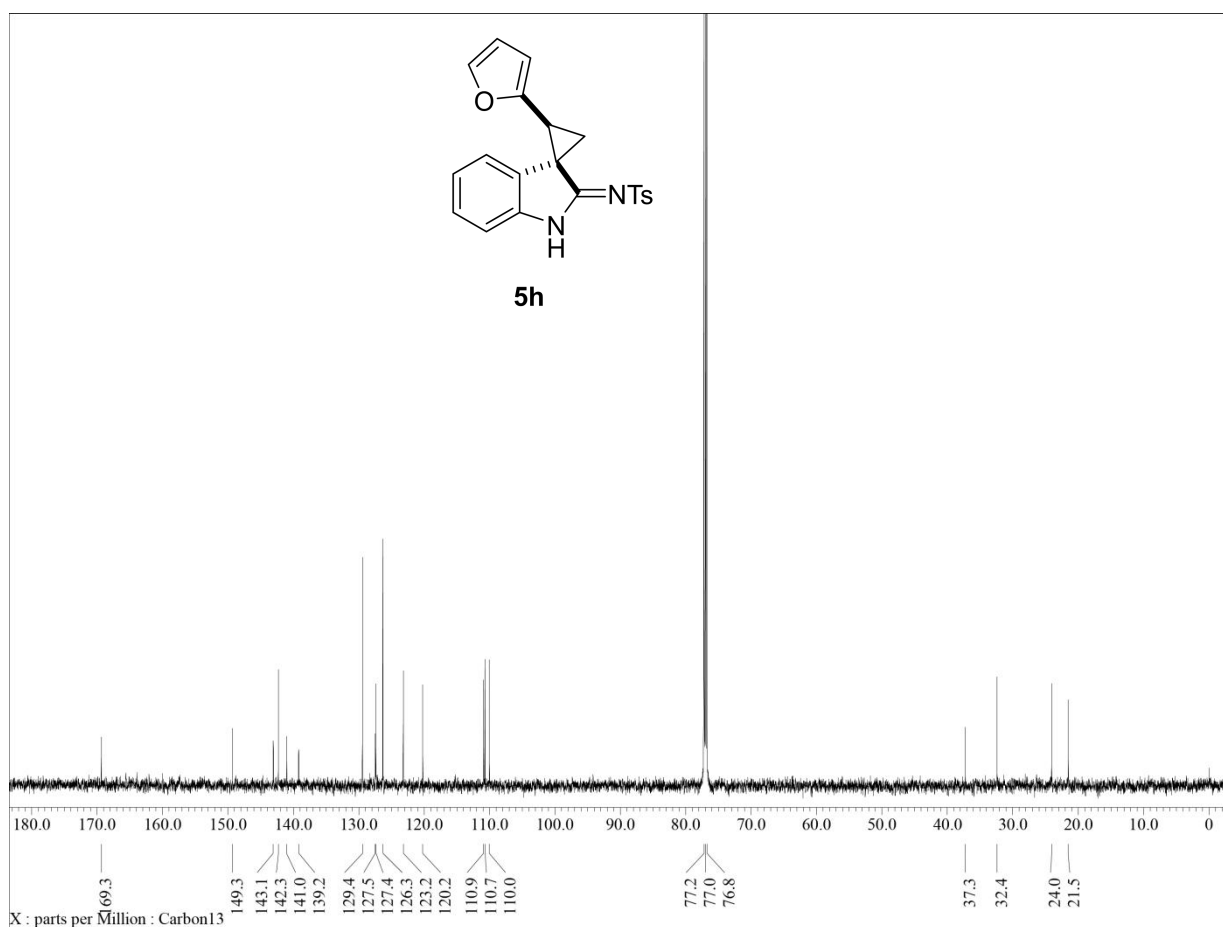

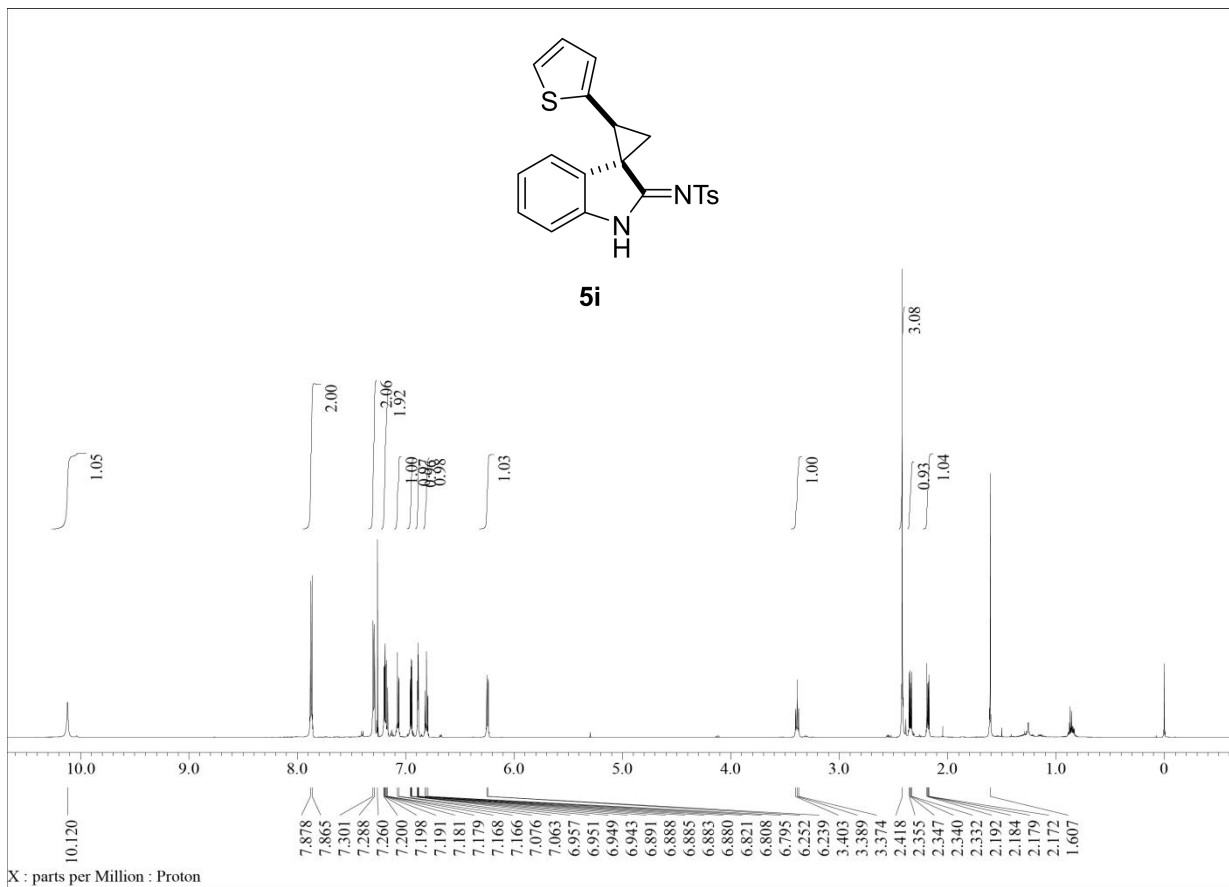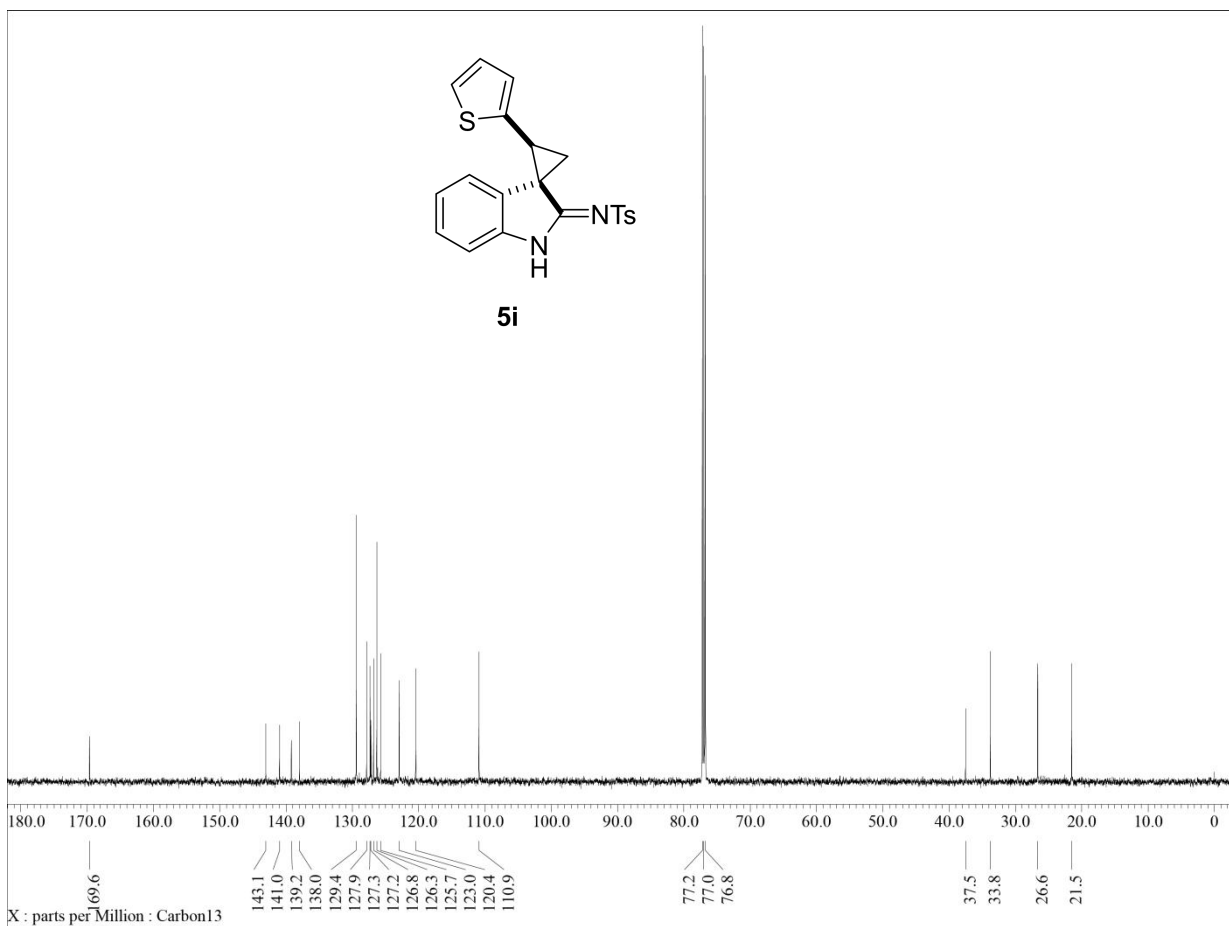

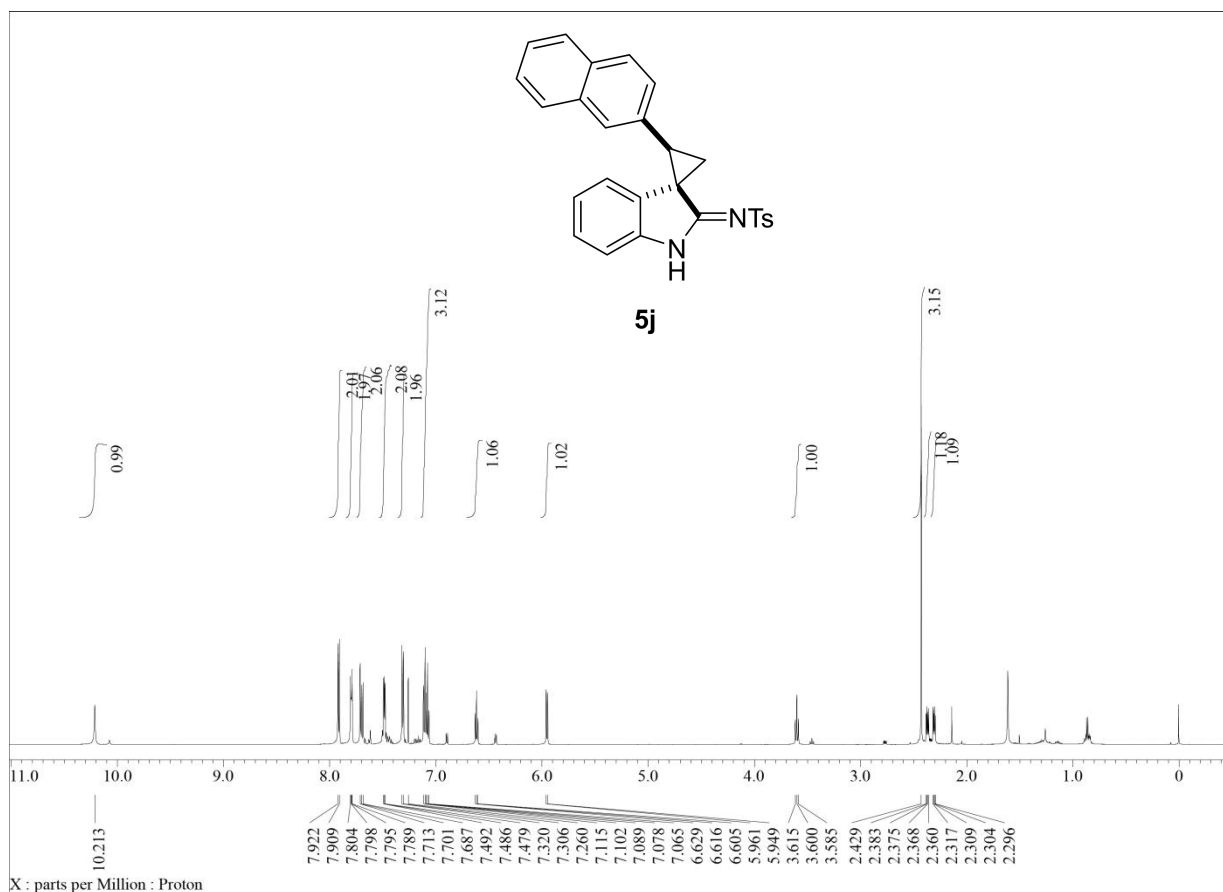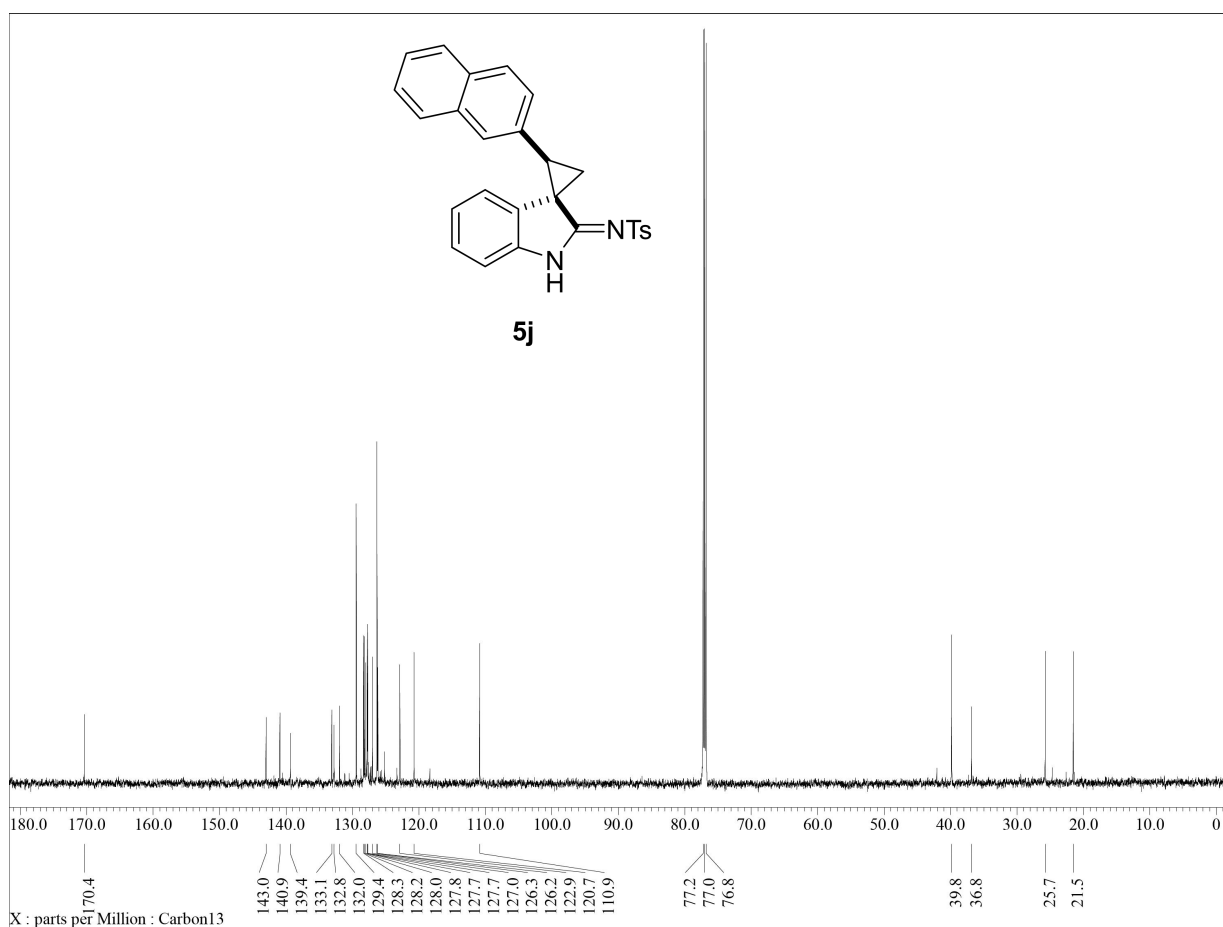

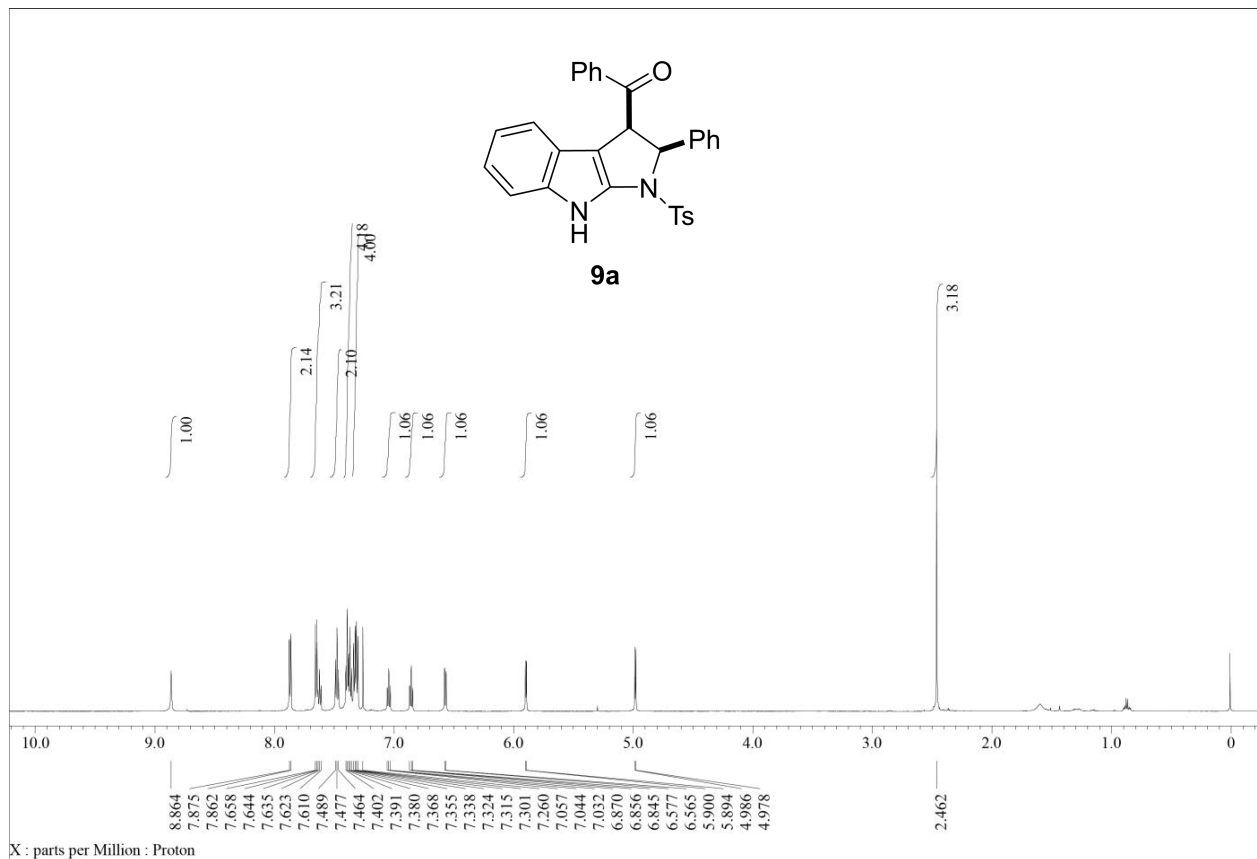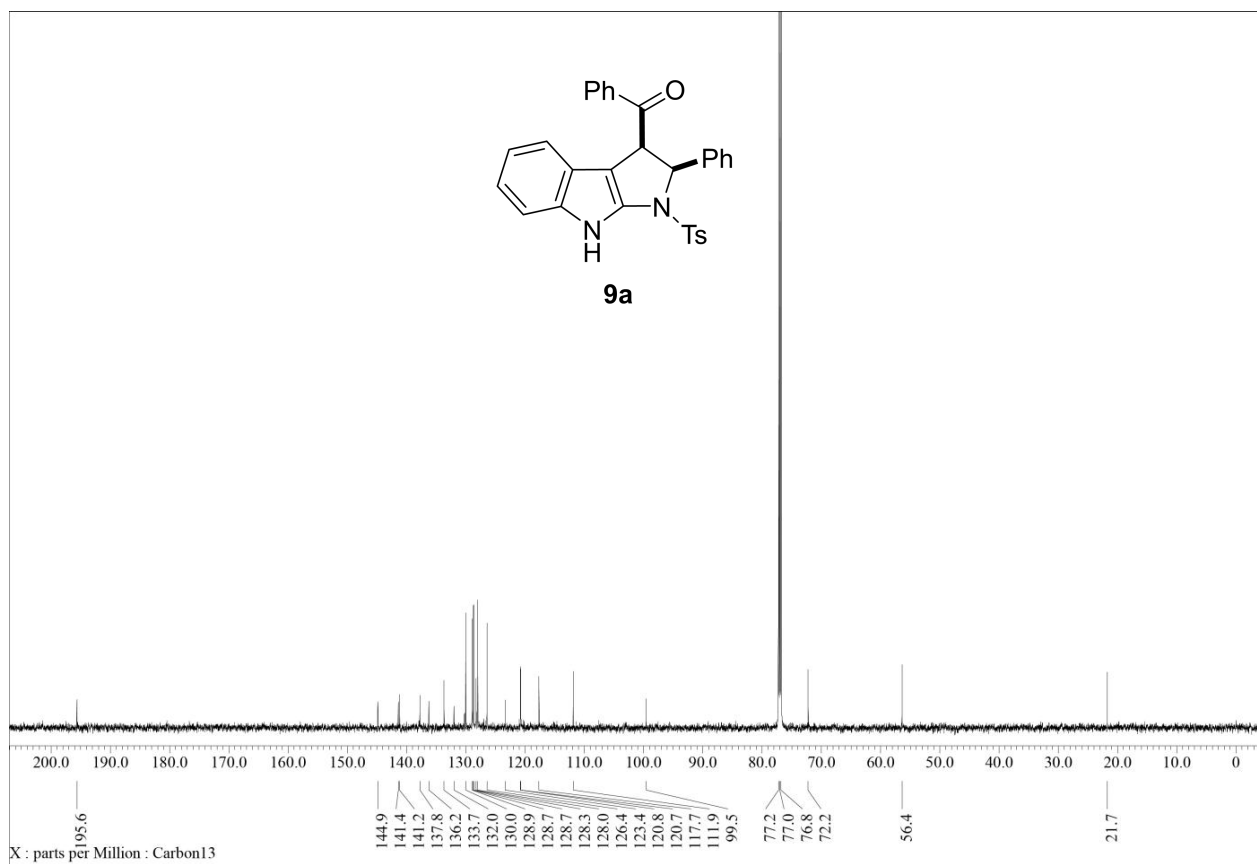

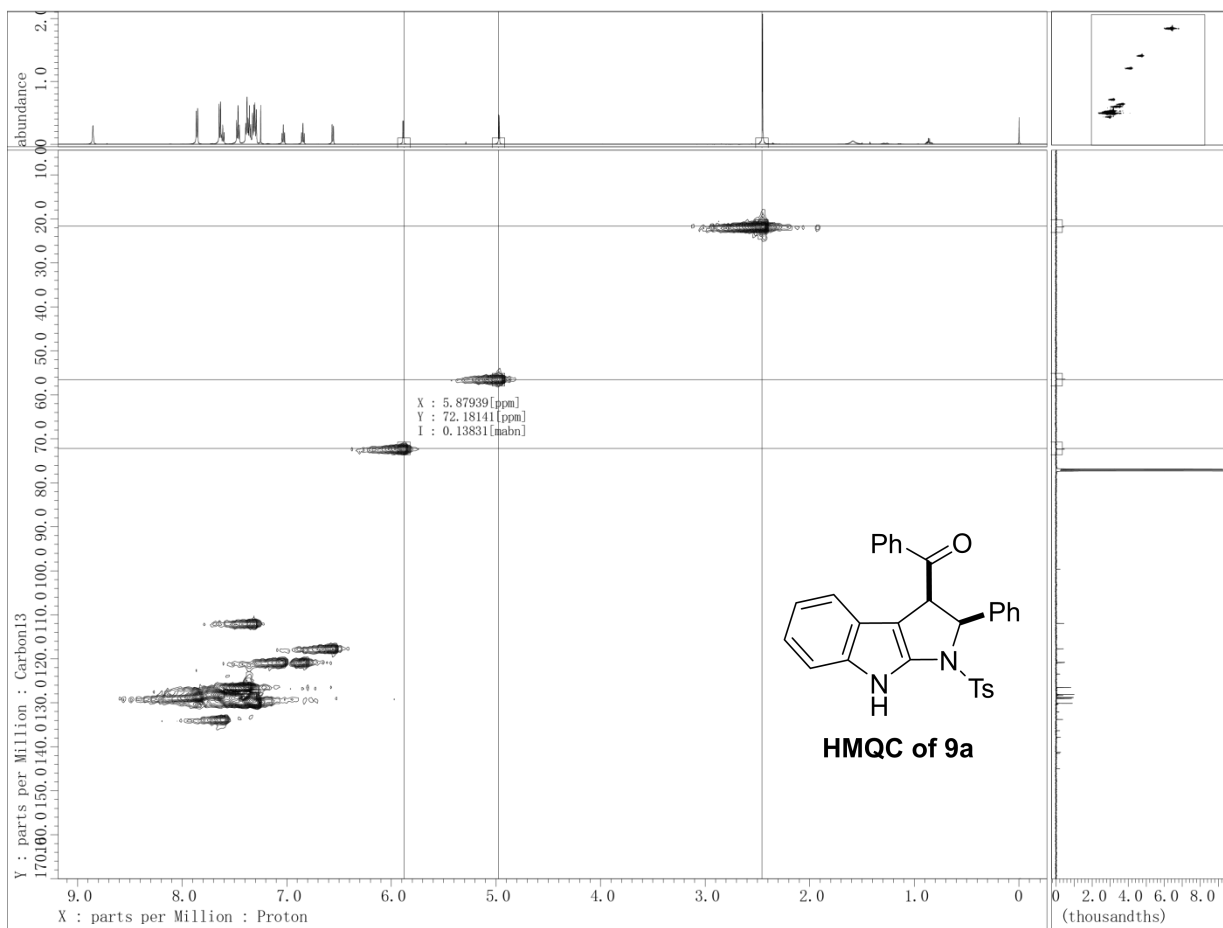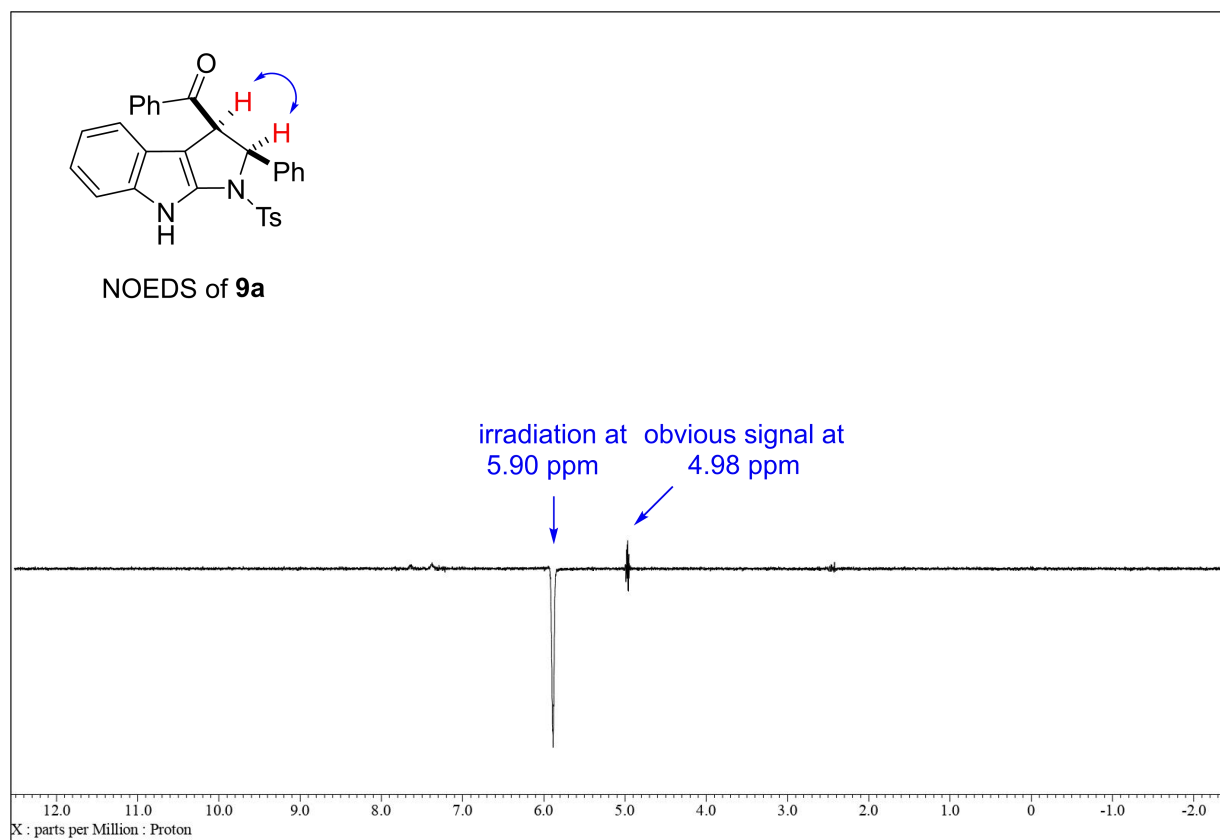



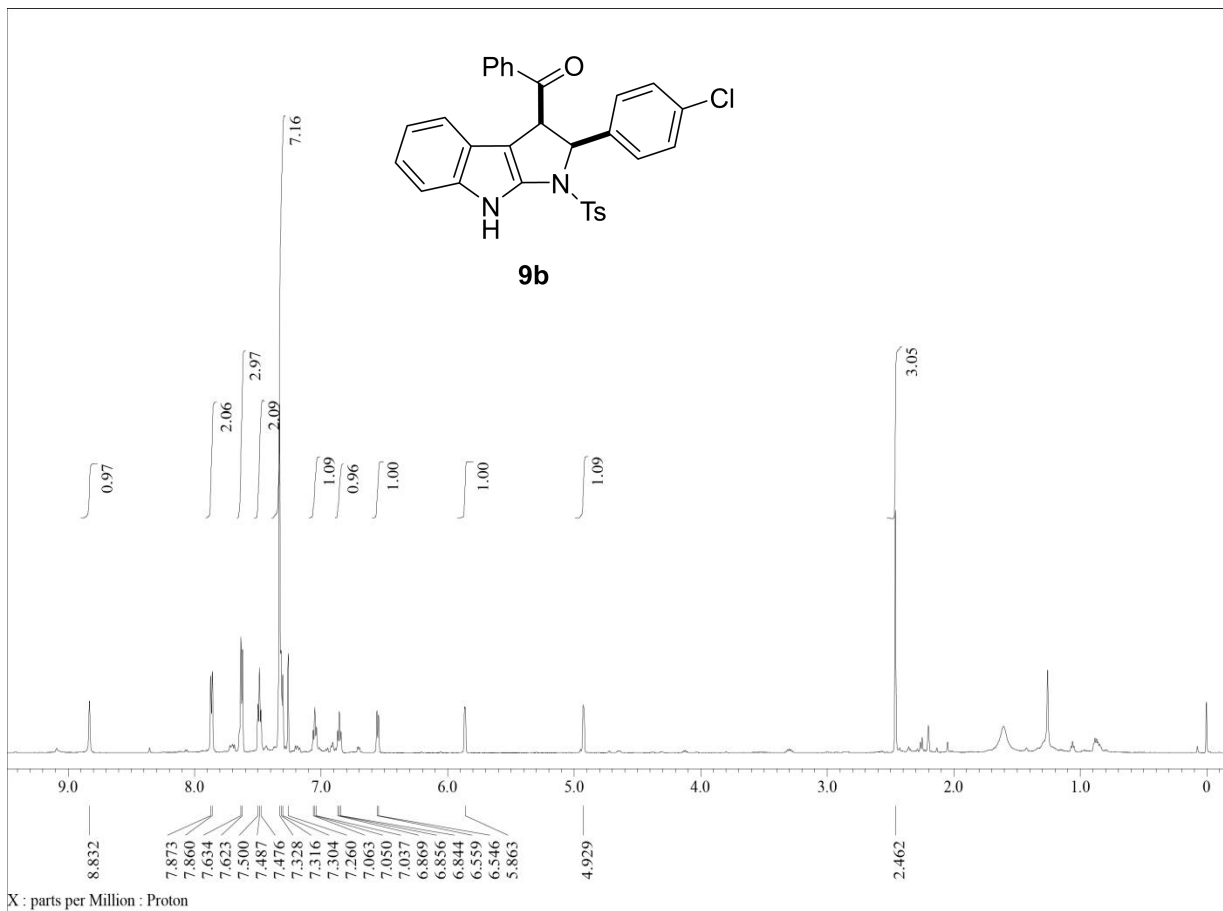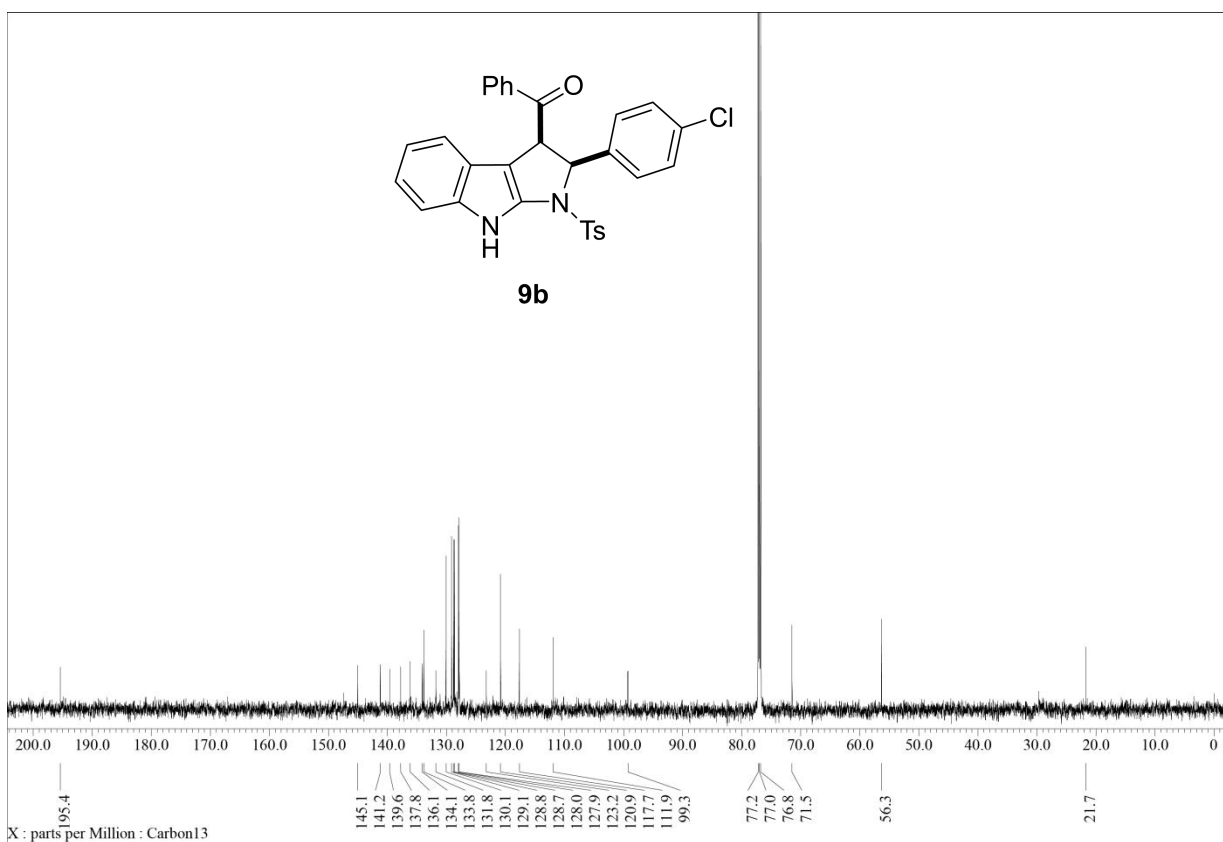

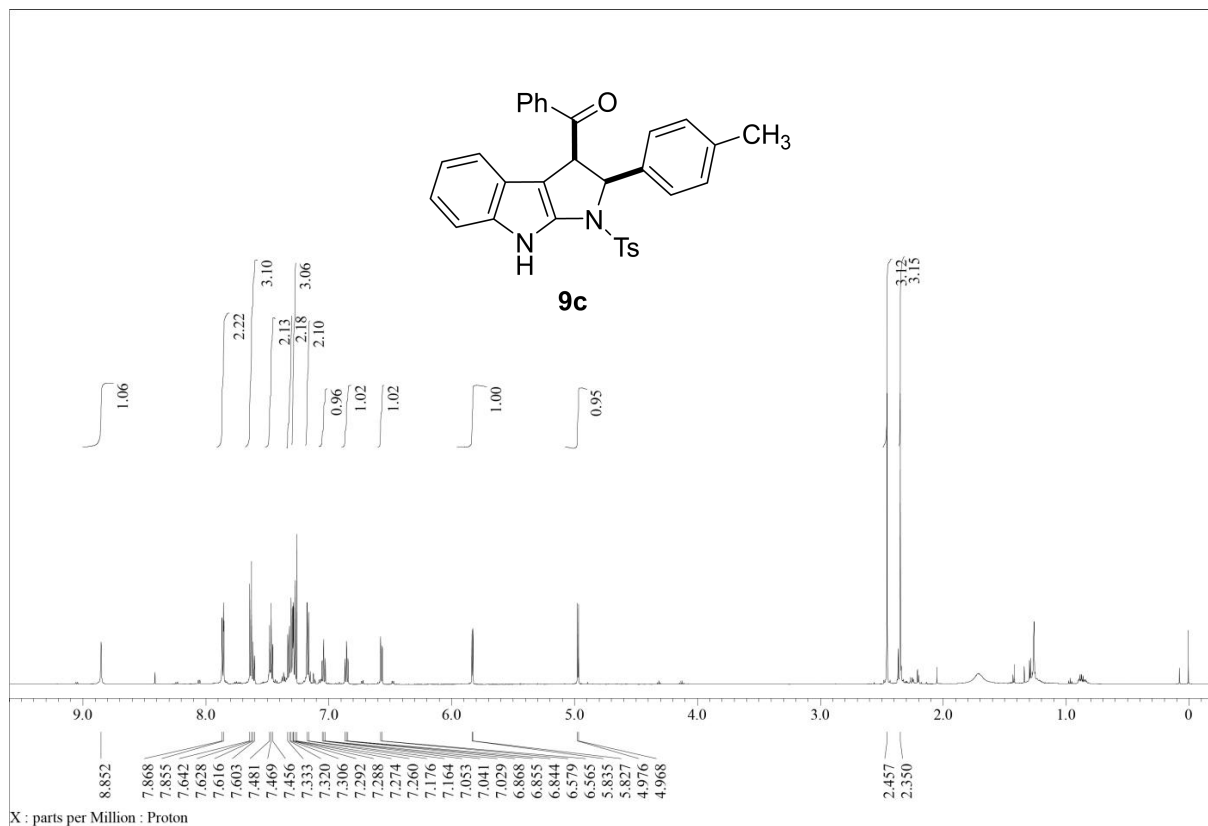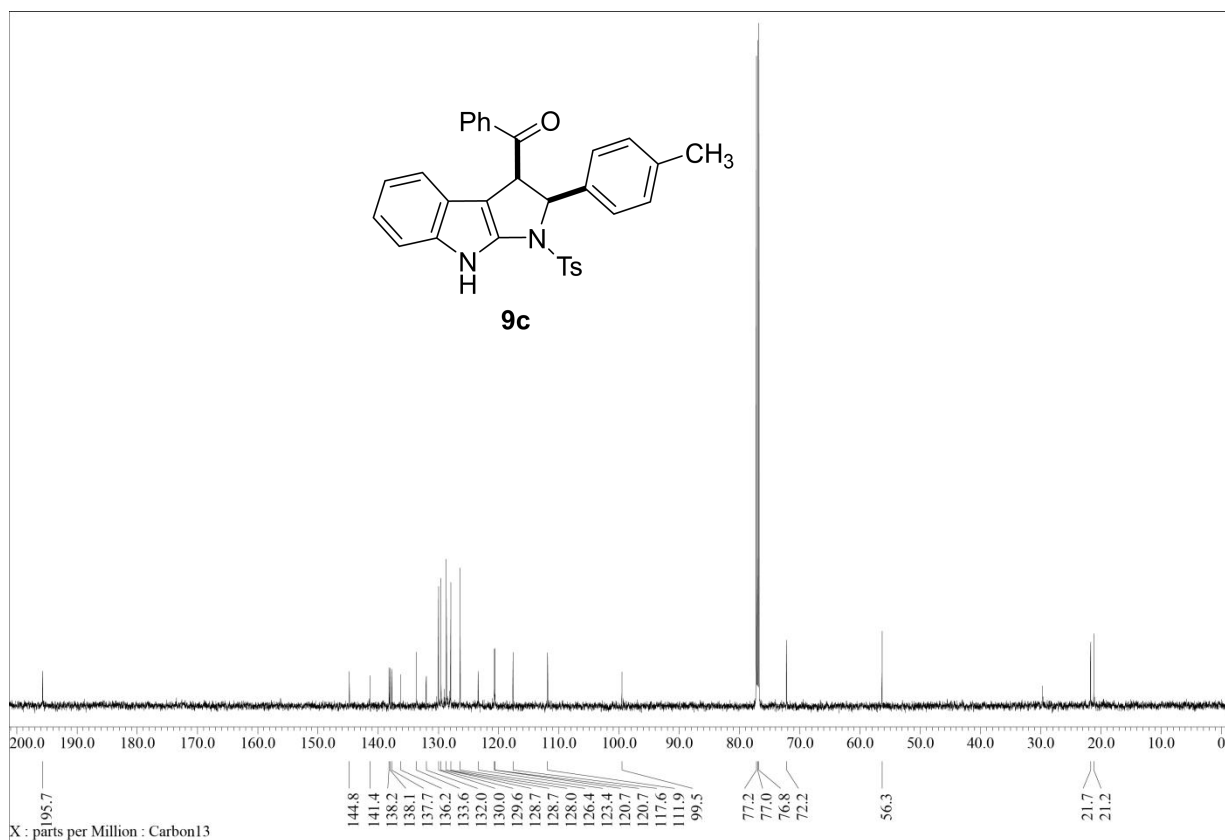

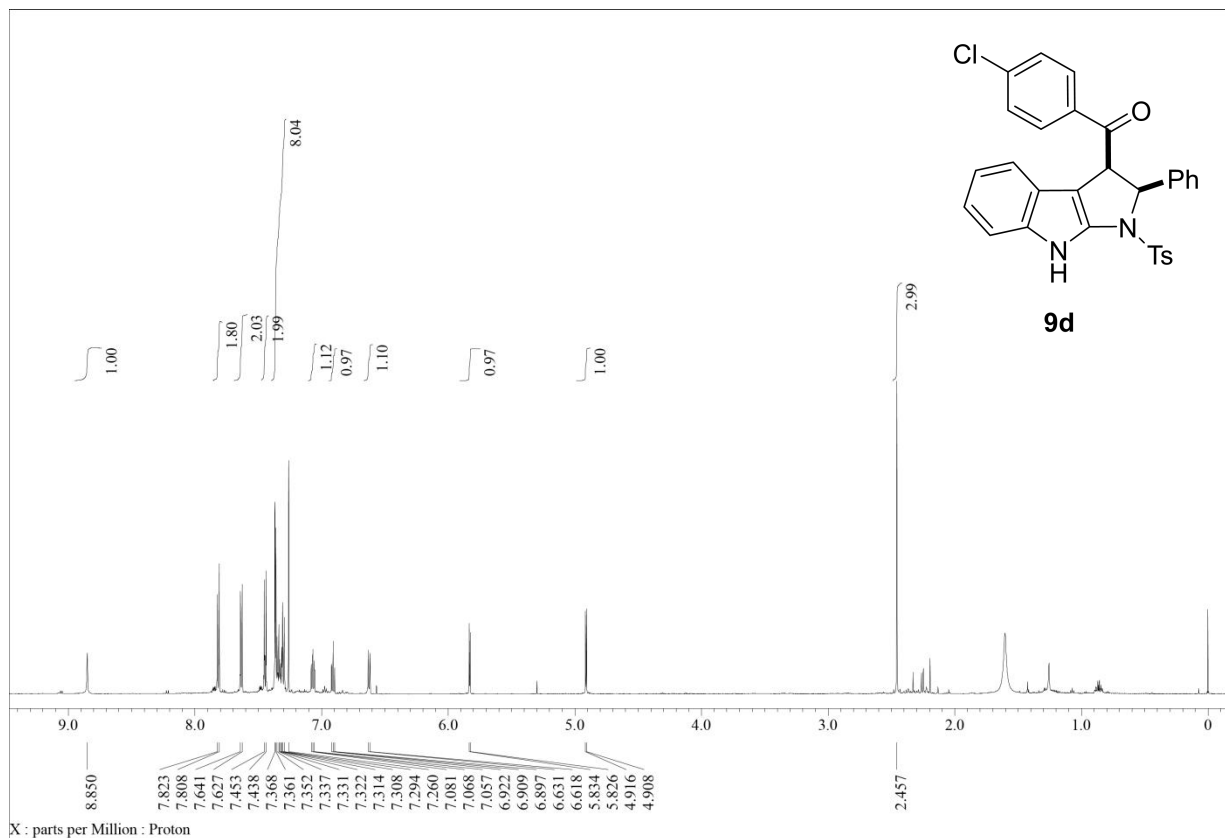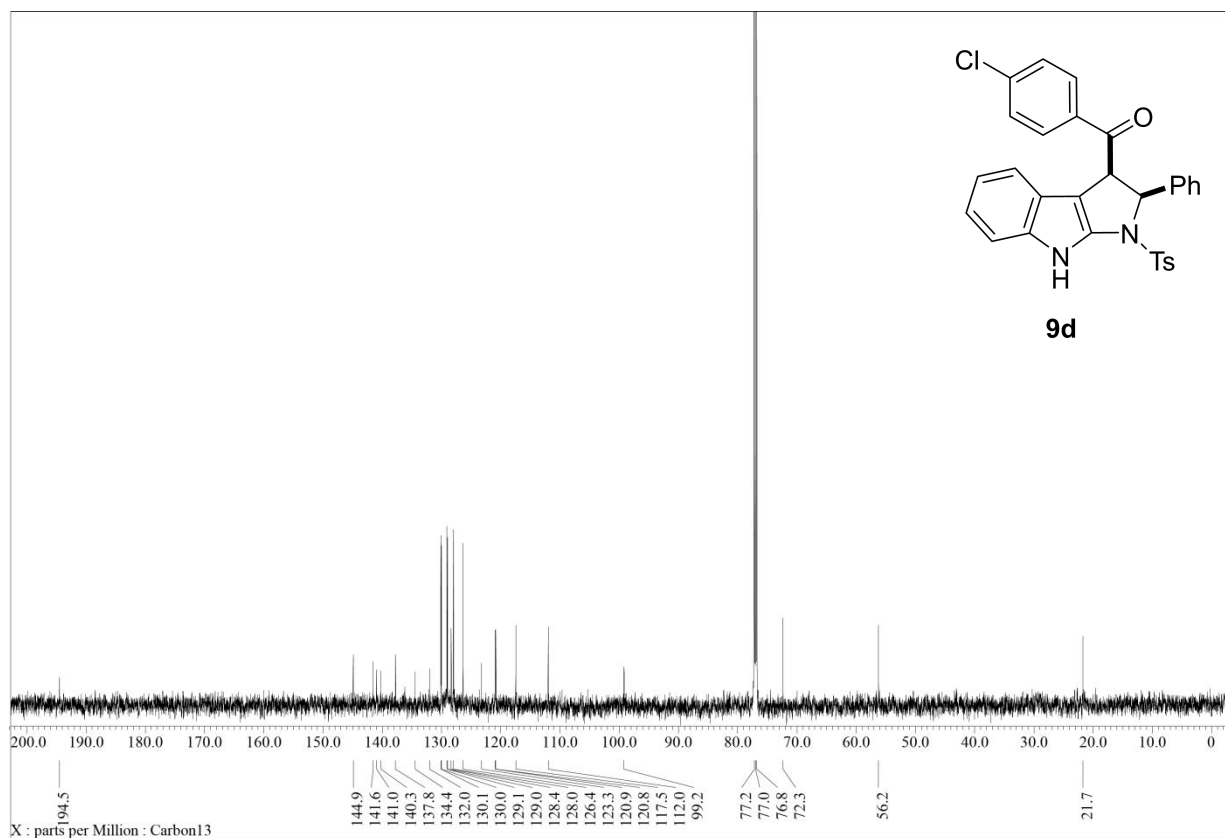

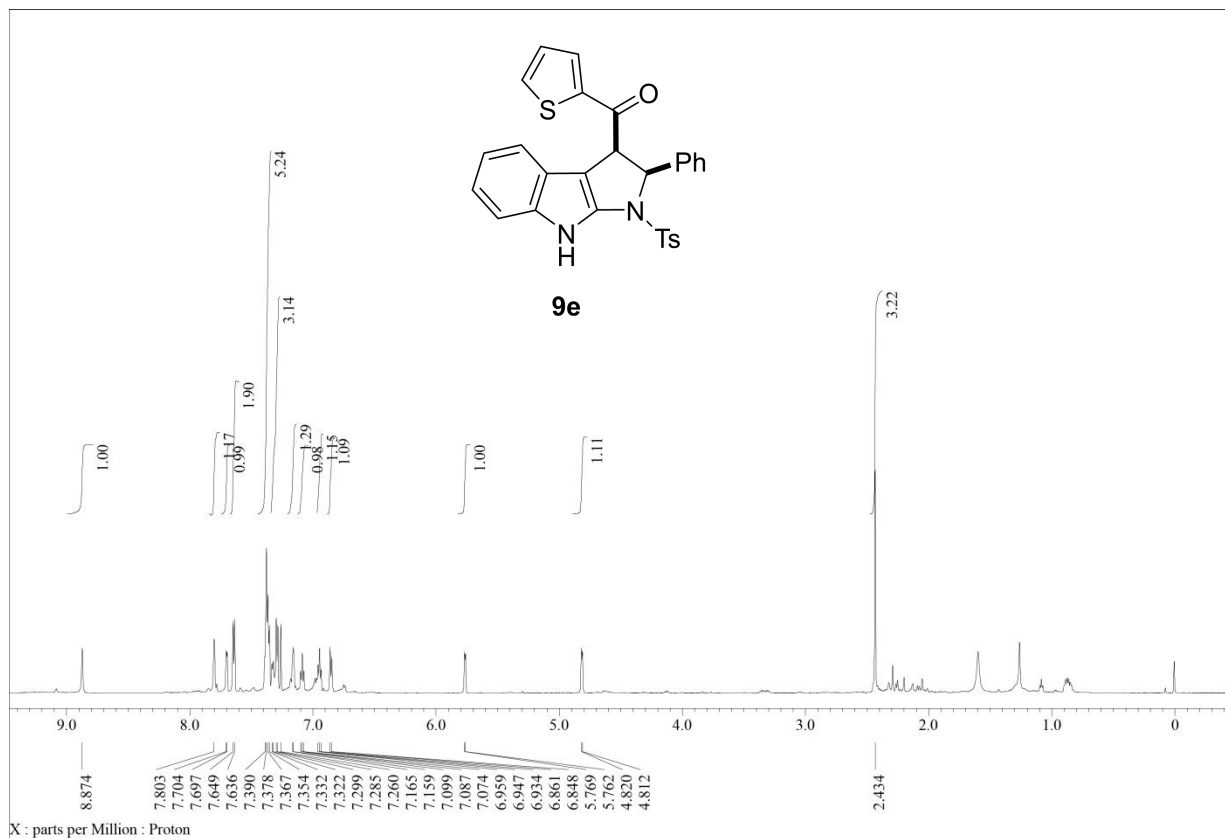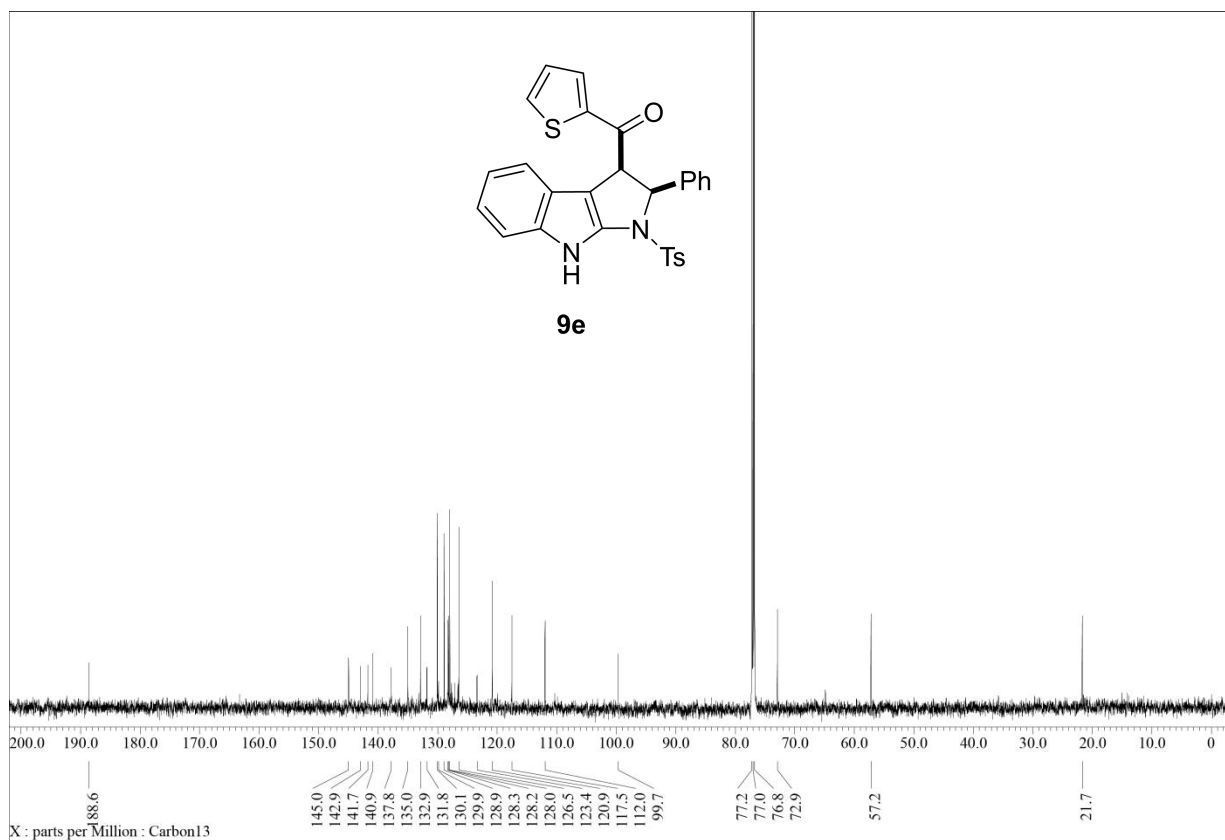

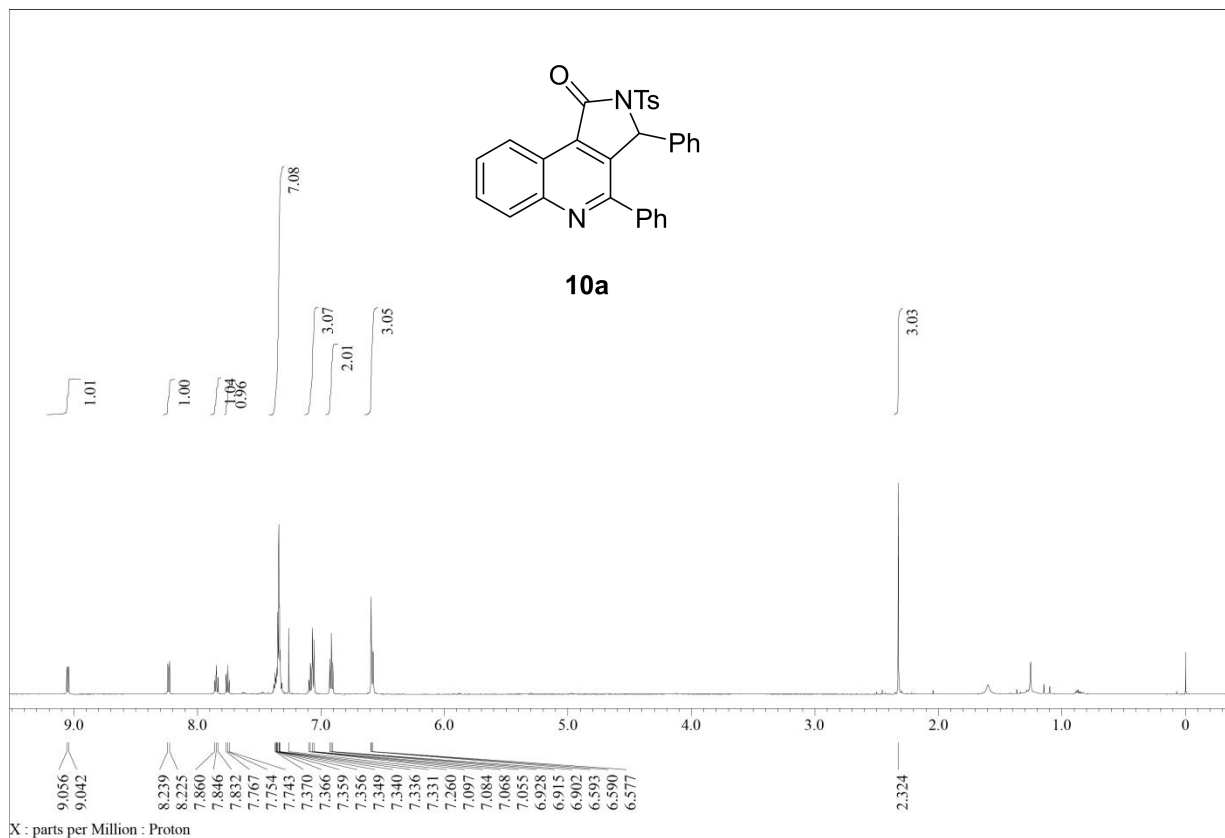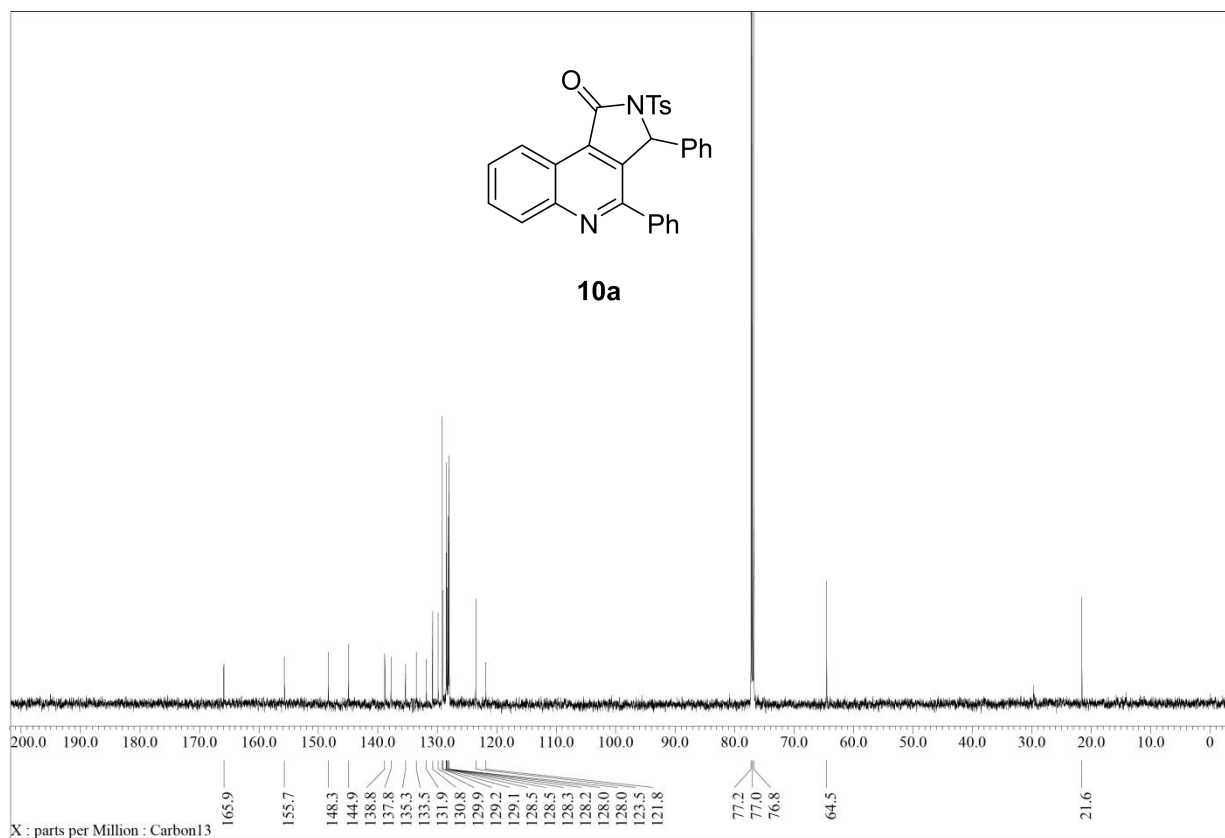

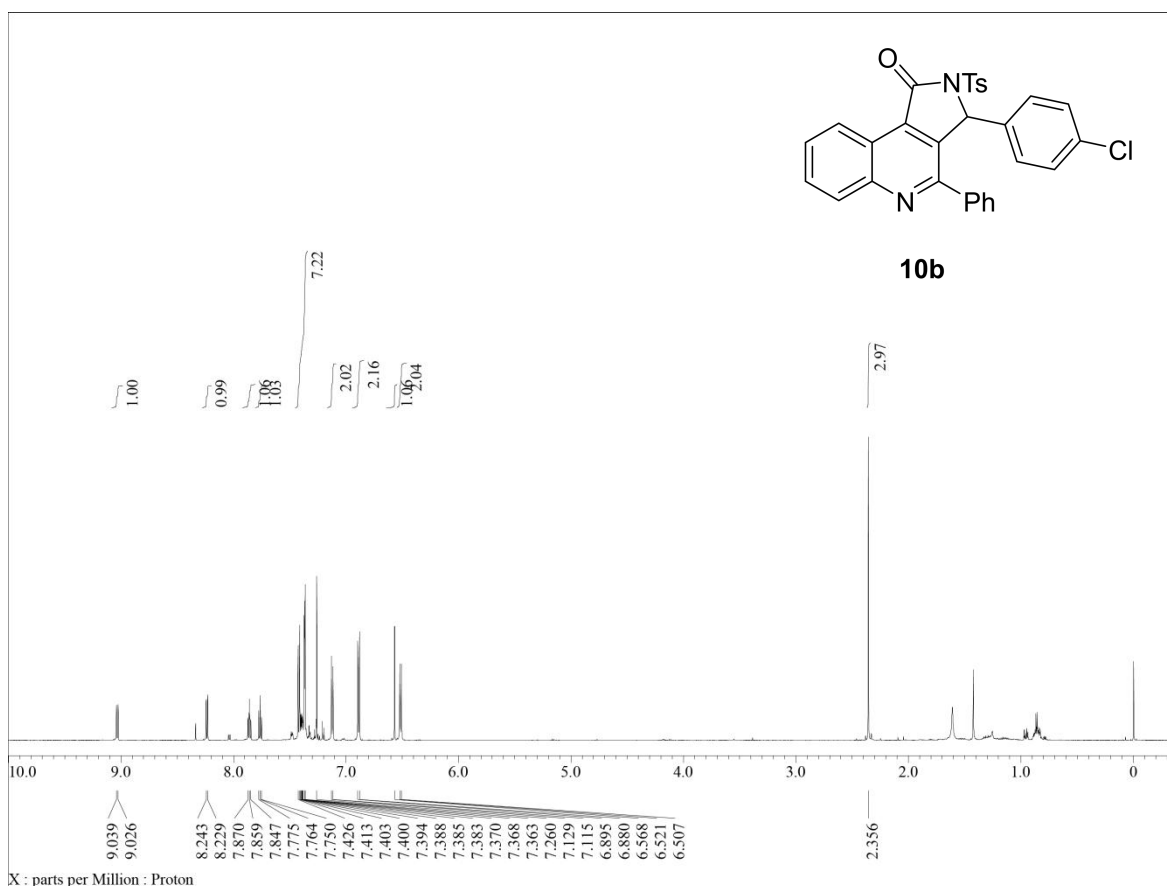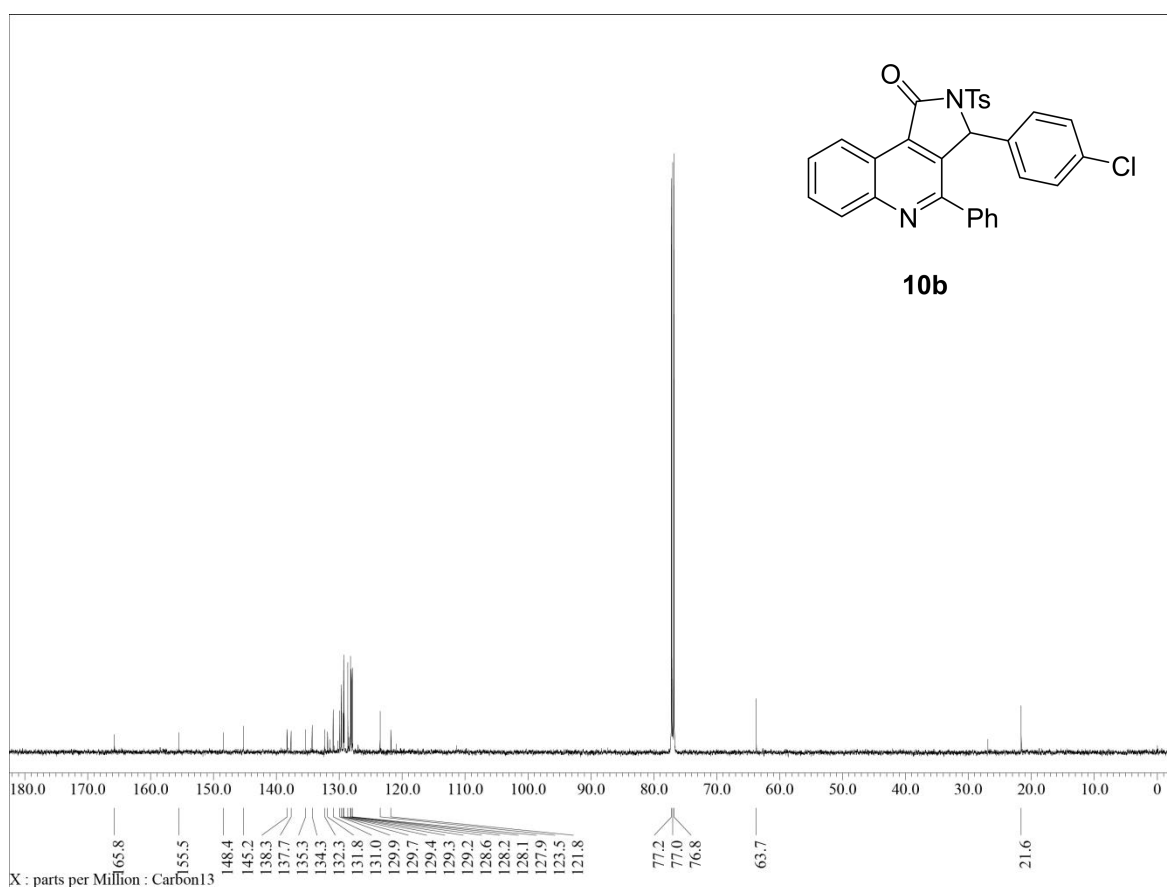

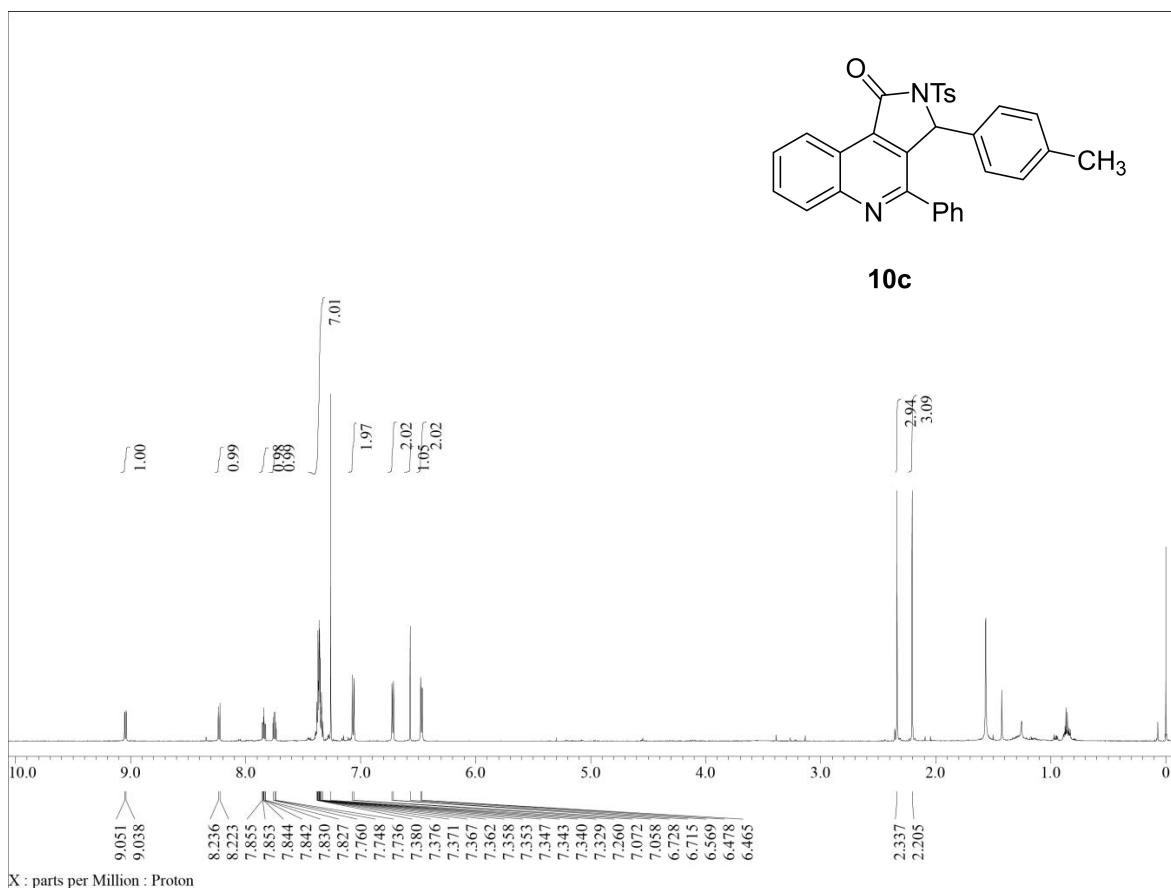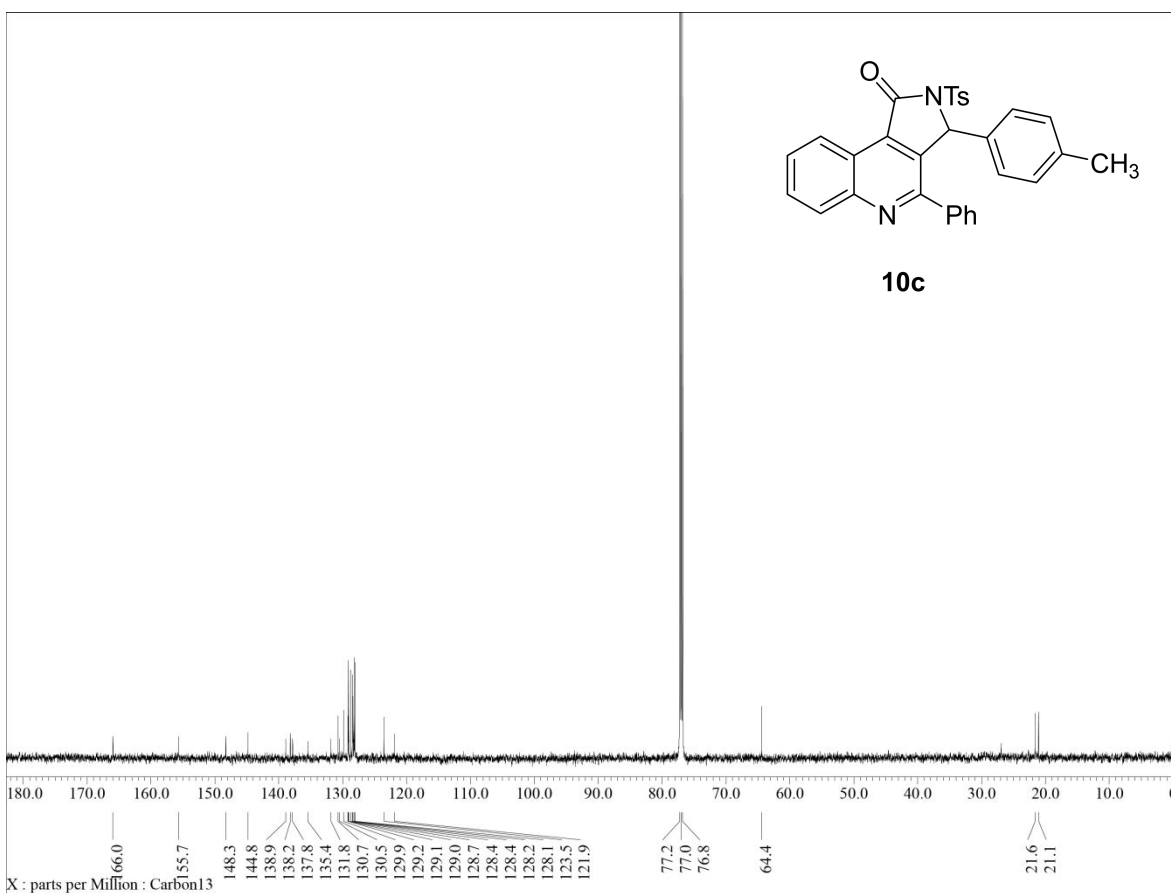

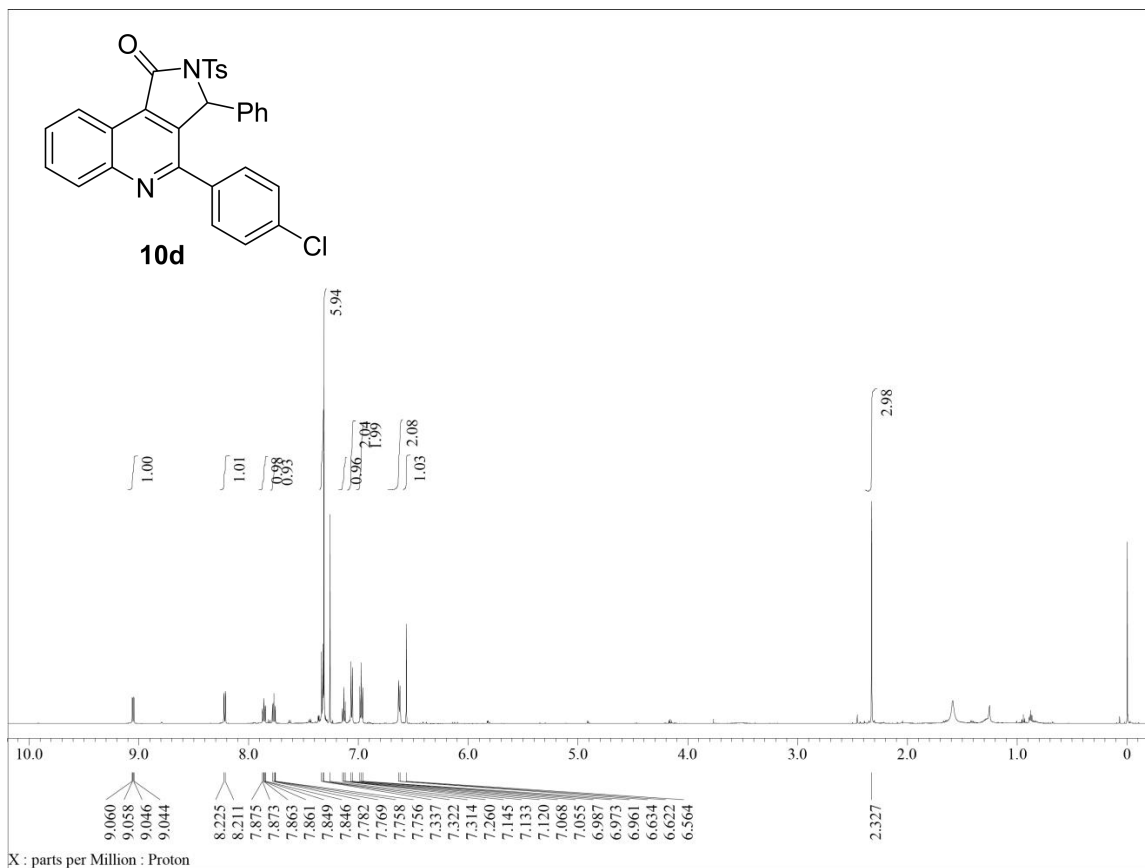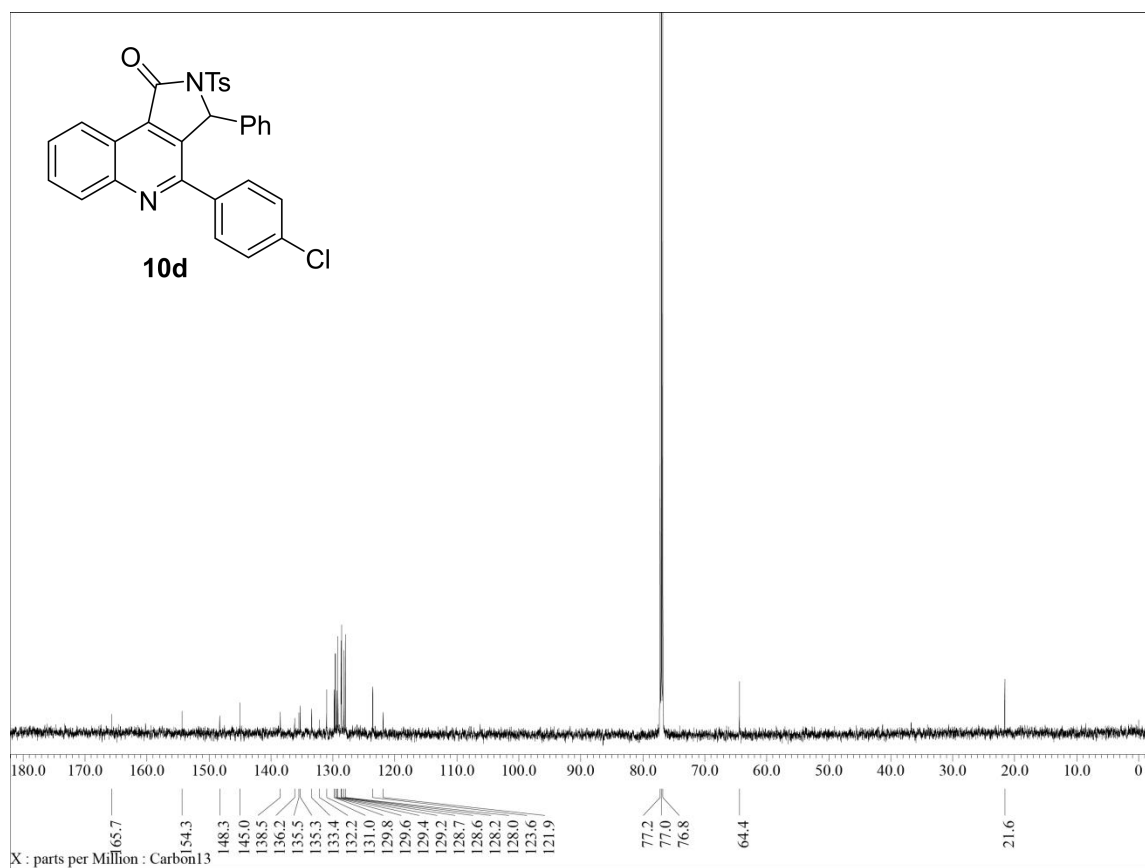



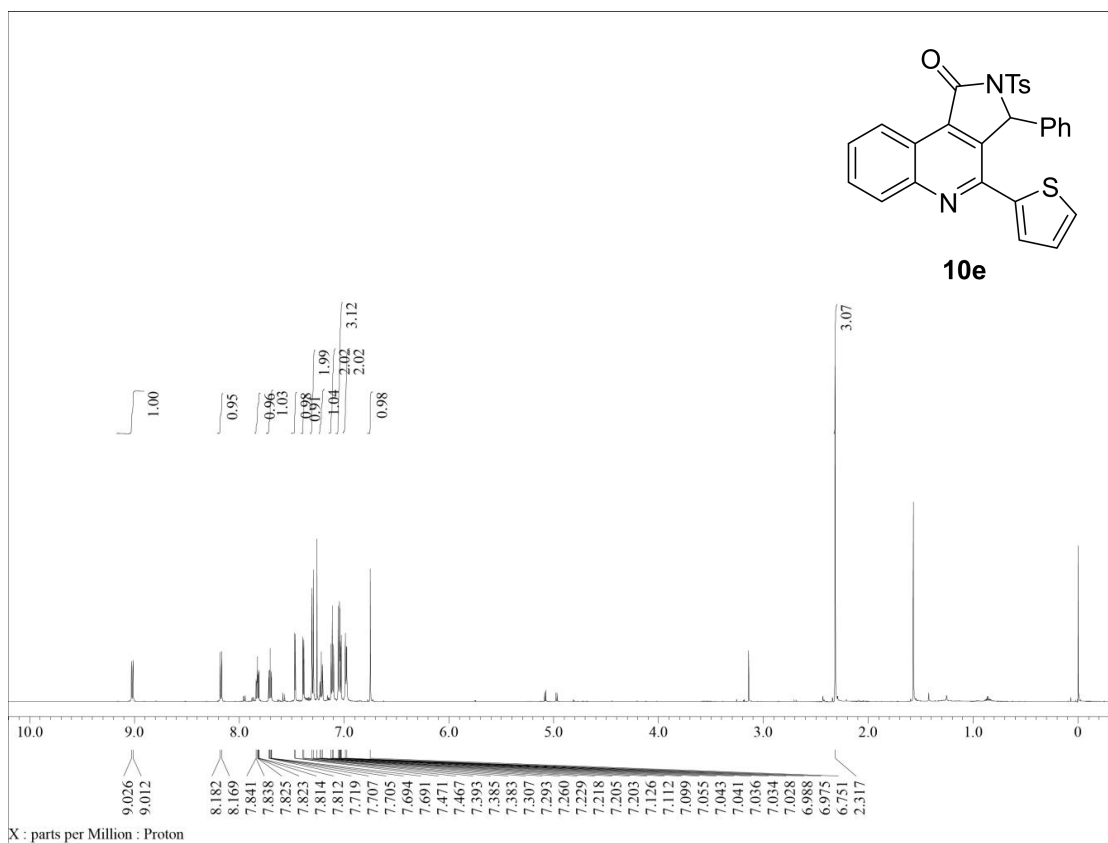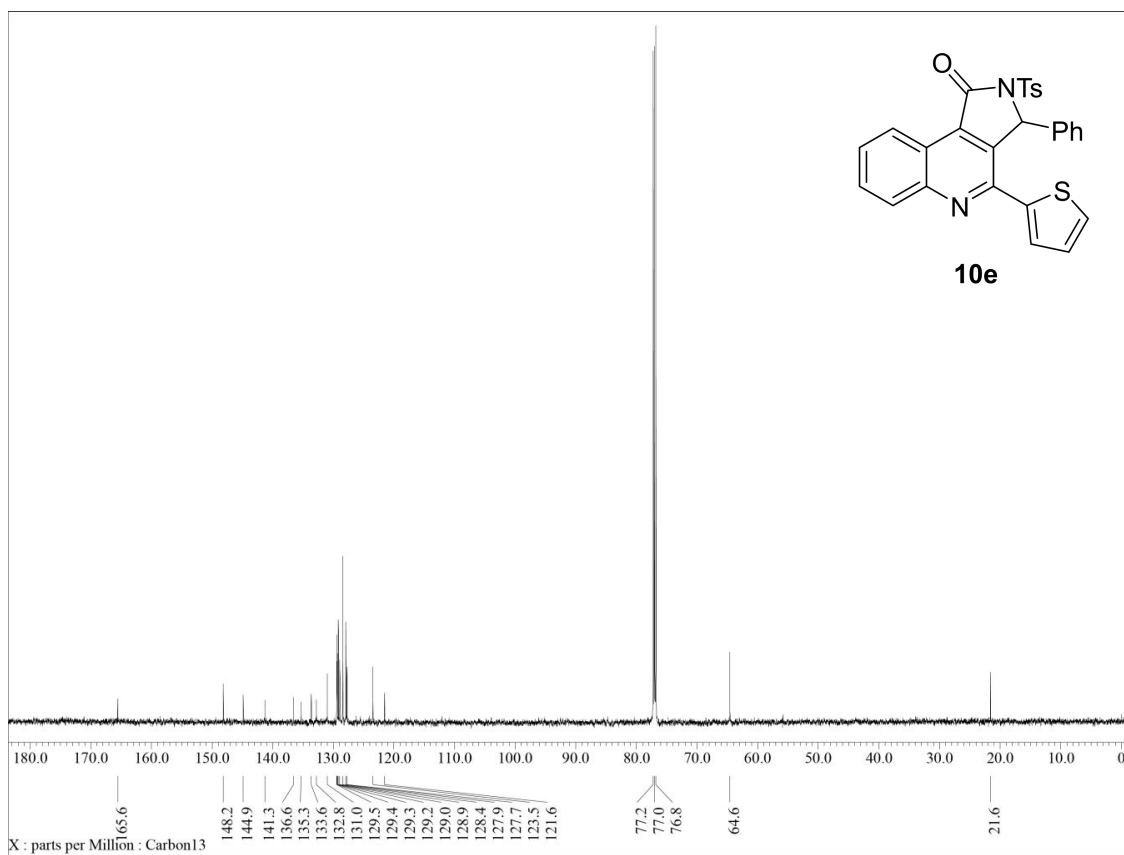

Supplement: d2ob00466f1.pdf [file d2ob00466f1.pdf]
